# Supplementary material
Source: PubMed Central journal article supplement (PMC2627407)

# Facile *N*-Arylation of Amines and Sulfonamides and *O*-Arylation of Phenols and Arenecarboxylic Acids

Zhijian Liu and Richard C. Larock \*

*Department of Chemistry, Iowa State University, Ames, Iowa 50011*

larock@iastate.edu

|                                                                   | <b>Page(s)</b> |
|-------------------------------------------------------------------|----------------|
| General                                                           | 2S             |
| <sup>1</sup> H and <sup>13</sup> C NMR Data for all new compounds | 3S-12S         |
| References                                                        | 13S-15S        |
| Copies of <sup>1</sup> H and <sup>13</sup> C NMR Spectra          | 16S-62S        |

## Supporting Information

**General.** The  $^1\text{H}$  and  $^{13}\text{C}$  NMR spectra were recorded at 300 and 75.5 MHz or 400 and 100 MHz respectively. All melting points are uncorrected. High resolution mass spectra were recorded on a Kratos MS50TC double focusing magnetic sector mass spectrometer using EI at 70 eV. All reagents were used directly as obtained commercially unless otherwise noted. All yields reported represent an average of at least two independent runs. The substituted silylaryl triflates (**1b**, **1c**, **1d**, and **1e**) were prepared according to a literature procedure.<sup>1</sup> The product characterization data, and  $^1\text{H}$  and  $^{13}\text{C}$  NMR spectra for compounds **1**, **2**, **9**, **14**, **21**, **22**, **32**, **35**, **36**, **37**, **38**, **44**, **46**, **48**, and **53** have been reported in our previous communication.<sup>2</sup> The product characterization data, and  $^1\text{H}$  and  $^{13}\text{C}$  NMR spectra for compounds **62**, **63**, **64**, **67**, **68**, **69**, **70**, **71**, **75**, **76**, **83**, **84**, **85**, **86**, **89**, and **91** have been reported in our previous communication.<sup>3</sup>

### **General Procedure for the Mono *N*-Arylation of Aromatic Amines (Table 1).**

For this experimental procedure, see the text.

### **General Procedure for the Mono *N*-Arylation of Alkylamines (Table 2).**

For this experimental procedure, see the text.

### **General Procedure for the Diarylation of Amines and Sulfonamides (Tables 2 and 3).**

For this experimental procedure, see the text.

### **General Procedure for the *O*-Arylation of Phenols (Table 4).**

For this experimental procedure, see the text.

### **General Procedure for the *O*-Arylation of Carboxylic Acids (Table 5).**

For this experimental procedure, see the text.

### Characterization Data:

***N*-(4-Nitrophenyl)aniline (3).** The indicated compound was obtained in an 85% yield as a light yellow solid: mp 135-136 °C (lit.<sup>4</sup> 134-135 °C); the <sup>1</sup>H and <sup>13</sup>C NMR spectra match the literature data.<sup>5</sup>

**4-(Phenylamino)benzotrile (4).** The indicated compound was obtained in a 90% yield as a white solid: mp 99-100 °C (lit.<sup>6</sup> 101-102 °C); the <sup>1</sup>H and <sup>13</sup>C NMR spectra match the literature data.<sup>5</sup>

**Ethyl 4-(phenylamino)benzoate (5).** The indicated compound was obtained in a 92% yield as light yellow oil. The <sup>1</sup>H and <sup>13</sup>C NMR spectra match the literature data.<sup>7</sup>

***N*-(4-Acetylphenyl)aniline (6).** The indicated compound was obtained in a 94% yield as a light yellow solid: mp 105-106 °C (lit.<sup>8</sup> 104-105 °C); the <sup>1</sup>H and <sup>13</sup>C NMR spectra match the literature data.<sup>9</sup>

***N*-[3-(Phenylamino)phenyl]acetamide (7).** The indicated compound was obtained in a 95% yield as a light yellow oil: <sup>1</sup>H NMR (300 MHz, CDCl<sub>3</sub>) δ 2.04 (s, 3H), 5.79 (s, 1H), 6.77 (dd, *J* = 8.1, 1.5 Hz, 1H), 6.88 (t, *J* = 7.2 Hz, 1H), 6.94-7.01 (m, 3H), 7.09 (t, *J* = 7.8 Hz, 1H), 7.19 (t, *J* = 7.8 Hz, 2H), 7.29 (t, *J* = 1.8 Hz, 1H), 8.15 (s, 1H); <sup>13</sup>C NMR (75 MHz, CDCl<sub>3</sub>) δ 24.7, 109.4, 112.6, 113.2, 118.6, 121.5, 129.6, 129.9, 139.4, 142.9, 144.3, 169.5; HRMS *m/z* 226.1109 (calcd C<sub>14</sub>H<sub>14</sub>N<sub>2</sub>O, 226.1106).

***N*-(4-Methoxyphenyl)aniline (8).** The indicated compound was obtained in an 89% yield as a white solid: mp 101-102 °C (lit.<sup>10</sup> 102-103 °C); the <sup>1</sup>H and <sup>13</sup>C NMR spectra match the literature data.<sup>9</sup>

***N*-Phenyl-4-iodoaniline (10).** The indicated compound was obtained in a 92% yield as a light yellow solid: mp 100-102 °C (lit.<sup>11</sup> 102-104 °C); the <sup>1</sup>H and <sup>13</sup>C NMR spectra match the literature data.<sup>11</sup>

***N*-Phenyl-4-bromoaniline (11).** The indicated compound was obtained in a 91% yield as a light yellow solid: mp 87-89 °C (lit.<sup>8</sup> 87-89 °C); the <sup>1</sup>H and <sup>13</sup>C NMR spectra match the literature data.<sup>12</sup>

***N*-Phenyl-2-*tert*-butylaniline (12).** The indicated compound was obtained in a 77% yield as a yellow solid: mp 64-65 °C; <sup>1</sup>H NMR (300 MHz, CDCl<sub>3</sub>) δ 1.46 (s, 9H), 5.42 (s, 1H), 6.82-6.86 (m, 3H), 7.09-7.47 (m, 6H); <sup>13</sup>C NMR (75 MHz, CDCl<sub>3</sub>) δ 30.8, 35.1, 116.2, 119.4, 124.2, 126.2, 127.1, 127.3, 129.5, 141.4, 143.6, 146.2; IR (CDCl<sub>3</sub>, cm<sup>-1</sup>) 3454, 3047, 2962, 2097, 2870, 1595, 1497; HRMS m/z 225.1520 (calcd C<sub>16</sub>H<sub>19</sub>N, 225.1517).

***N*-Phenyl-2,4,6-trimethylaniline (13).** The indicated compound was obtained in a 90% yield as a yellow solid: mp 54-56 °C (lit.<sup>13</sup> 56 °C); the <sup>1</sup>H and <sup>13</sup>C NMR spectra match the literature data.<sup>13</sup>

***N*-Methyl-*N*-phenyl-3,4-dimethylaniline (15).** The indicated compound was obtained in a 97% yield as a yellow oil; <sup>1</sup>H NMR (300 MHz, CDCl<sub>3</sub>) δ 2.75 (s, 3H), 2.28 (s, 3H), 3.33 (s, 3H), 6.87-6.98 (m, 5H), 7.12 (d, *J* = 8.1 Hz, 1H), 7.24-7.30 (m, 2H); <sup>13</sup>C NMR (75 MHz, CDCl<sub>3</sub>) δ 19.4, 20.3, 40.6, 118.1, 119.8, 120.6, 124.5, 129.2, 130.7, 131.3, 137.8, 147.2, 149.7; IR (CDCl<sub>3</sub>, cm<sup>-1</sup>) 3021, 2920, 2863, 1595, 1497; HRMS m/z 211.1364 (calcd C<sub>15</sub>H<sub>17</sub>N, 211.1361).

***N*-Methyl-*N*-phenyl-3-methoxyaniline (16).** The indicated compound was obtained in a 47% yield as a yellow oil; the <sup>1</sup>H and <sup>13</sup>C NMR spectra match the literature data.<sup>14</sup>

***N*-Methyl-*N*-phenyl-4-methoxyaniline (17).** The indicated compound was obtained in a 47% yield as a yellow oil; the <sup>1</sup>H and <sup>13</sup>C NMR spectra match the literature data.<sup>14</sup>

***N*-Methyl-*N*-phenyl-2-iodoaniline (18).** The indicated compound was obtained in a 97% yield as a white solid: mp 31-33 °C; <sup>1</sup>H NMR (300 MHz, CDCl<sub>3</sub>) δ 3.20 (s, 3H), 6.54 (d, *J* = 8.8 Hz, 2H), 6.75 (t, *J* = 7.2 Hz, 1H), 6.95-7.00 (m, 3H), 7.35 (t, *J* = 7.2 Hz, 1H), 7.94 (d, *J* = 8.8 Hz, 1H); <sup>13</sup>C NMR (75 MHz, CDCl<sub>3</sub>) δ 39.3, 101.4, 113.6, 117.9, 128.3,

129.1, 129.9, 130.2, 140.5, 148.7, 150.7; IR (CDCl<sub>3</sub>, cm<sup>-1</sup>) 3054, 3035, 2918, 2881, 2811, 1609, 1497; HRMS m/z 309.0019 (calcd C<sub>13</sub>H<sub>12</sub>IN, 309.0014).

***N*-Allyl-*N*-phenylaniline (19).** The indicated compound was obtained in a 97% yield as a yellow oil; the <sup>1</sup>H and <sup>13</sup>C NMR spectra match the literature data.<sup>15</sup>

**1-Phenylindoline (20).** The indicated compound was obtained in a 97% yield as a yellow oil; the <sup>1</sup>H and <sup>13</sup>C NMR spectra match the literature data.<sup>15</sup>

***N*-(3,4-Dimethylphenyl)-*N*-(4-methoxyphenyl)-3,4-dimethylaniline (23).** The indicated compound was obtained in a 93% yield as a white solid: mp 110-111 °C; <sup>1</sup>H NMR (300 MHz, CDCl<sub>3</sub>) δ 2.14 (s, 6H), 2.19 (s, 6H), 6.74-6.82 (m, 6H), 6.95-7.03 (m, 4H); <sup>13</sup>C NMR (75 MHz, CDCl<sub>3</sub>) δ 19.3, 20.2, 55.7, 114.8, 120.9, 124.7, 126.6, 130.2, 130.4, 137.4, 141.7, 146.5, 155.7; IR (CDCl<sub>3</sub>, cm<sup>-1</sup>) 3017, 2963, 2932, 2918, 2858, 1606, 1501; HRMS m/z 331.1942 (calcd C<sub>23</sub>H<sub>25</sub>NO, 331.1936).

***N,N*-Diphenyl-4-methoxyaniline (24).** The indicated compound was obtained in a 90% yield as a yellow solid: mp 98-100 °C (lit.<sup>16</sup> 98-100 °C); the <sup>1</sup>H and <sup>13</sup>C NMR spectra match the literature data.<sup>17</sup>

***N,N*-Diphenyl-4-nitroaniline (25).** The indicated compound was obtained in a 55% yield as a yellow solid: mp 139-141 °C (lit.<sup>18</sup> 138-139 °C); the <sup>1</sup>H and <sup>13</sup>C NMR spectra match the literature data.<sup>19</sup>

**1-Phenyl-1*H*-imidazole (26).** The indicated compound was obtained in a 76% yield as a yellow oil; the <sup>1</sup>H and <sup>13</sup>C NMR spectra match the literature data.<sup>20</sup>

***N,N*-Diphenylnaphthalen-1-amine (27).** The indicated compound was obtained in an 81% yield as a white solid: mp 135-137 °C (lit.<sup>16</sup> 136-137 °C); the <sup>1</sup>H and <sup>13</sup>C NMR spectra match the literature data.<sup>16</sup>

**2-Phenyl-2H-benzo[*d*][1,2,3]triazole (28).** The indicated compound was obtained in a 20% yield as a white solid: mp 109-110 °C (lit.<sup>21</sup> 108-110 °C); <sup>1</sup>H NMR (300 MHz, CDCl<sub>3</sub>) δ 7.40-7.49 (m, 3H), 7.54-7.60 (m, 2H), 7.92-7.96 (m, 2H), 8.36 (dd, *J* = 9.0, 1.2 Hz, 2H); <sup>13</sup>C NMR (75 MHz, CDCl<sub>3</sub>) δ 118.6, 120.8, 127.4, 129.2, 129.6, 140.6, 145.2.

**1-Phenyl-1H-benzo[*d*][1,2,3]triazole (29).** The indicated compound was obtained in a 72% yield as a white solid: mp 85-86 °C (lit.<sup>22</sup> 85-87 °C); the <sup>1</sup>H and <sup>13</sup>C NMR spectra match the literature data.<sup>23</sup>

***N*-Benzylaniline (30).** The indicated compound was obtained in a 70% yield as a yellow oil; the <sup>1</sup>H NMR spectrum matches the literature data.<sup>24</sup>

***N*-Benzyl-3-methoxyaniline (31).** The indicated compound was obtained in a 71% yield as a yellow oil; the <sup>1</sup>H and <sup>13</sup>C NMR spectra match the literature data.<sup>25</sup>

***N*-(2-Phenylethyl)aniline (33).** The indicated compound was obtained in a 66 % yield as a yellow oil; the <sup>1</sup>H and <sup>13</sup>C NMR spectra match the literature data.<sup>26</sup>

***N,N*-Diphenylaniline (34).** The indicated compound was obtained in a 97% yield as a yellow solid: mp 86-87 °C (lit.<sup>27</sup> 88-89 °C); the <sup>1</sup>H and <sup>13</sup>C NMR spectra match the literature data.<sup>27</sup>

**1-Phenylpyrrolidine (39).** The indicated compound was obtained in a 95% yield as a yellow oil; the <sup>1</sup>H and <sup>13</sup>C NMR spectra match the literature data.<sup>28</sup>

***N*-(3-Methoxyphenyl)pyrrolidine (40).** The indicated compound was obtained in a 97% yield as a yellow oil; the <sup>1</sup>H and <sup>13</sup>C NMR spectra match the literature data.<sup>29</sup>

**4-Phenylmorpholine (41).** The indicated compound was obtained in an 81% yield as a yellow oil; the <sup>1</sup>H and <sup>13</sup>C NMR spectra match the literature data.<sup>30</sup>

***N,N*-Dibenzylaniline (42).** The indicated compound was obtained in a 99% yield as a yellow oil; The  $^1\text{H}$  and  $^{13}\text{C}$  NMR spectra match the literature data.<sup>31</sup>

***N*-Phenylphenylalanine ethyl ester (43).** The indicated compound was obtained in a 65% yield as a colorless oil; The  $^1\text{H}$  and  $^{13}\text{C}$  NMR spectra match the literature data.<sup>32</sup>

***N,N*-Diphenyltrifluoromethanesulfonamide (45).** The indicated compound was obtained in a 78% yield as a white solid: mp 105-106 °C;  $^1\text{H}$  NMR ( $\text{CDCl}_3$ , 300 MHz)  $\delta$  7.33-7.49 (m, 10H);  $^{13}\text{C}$  NMR (75 MHz,  $\text{CDCl}_3$ )  $\delta$  120.6 (q,  $J = 322$  Hz), 128.6, 129.1, 130.0, 140.1; IR ( $\text{CDCl}_3$ ,  $\text{cm}^{-1}$ ) 3087, 3071, 3017, 1589, 1492; HRMS  $m/z$  301.0388 (calcd  $\text{C}_{13}\text{H}_{10}\text{F}_3\text{NO}_2\text{S}$ , 301.0384).

***N,N*-Diphenyl-4-methylbenzenesulfonamide (47).** The indicated compound was obtained in a 100% yield as a yellow solid: mp 138-139 °C;  $^1\text{H}$  NMR ( $\text{CDCl}_3$ , 300 MHz)  $\delta$  2.43 (s, 3H), 7.25-7.32 (m, 12H), 7.60 (d,  $J = 7.2$  Hz, 2H);  $^{13}\text{C}$  NMR (75 MHz,  $\text{CDCl}_3$ )  $\delta$  21.8, 127.6, 128.0, 128.6, 129.5, 129.8, 137.8, 141.8, 143.8; IR ( $\text{CDCl}_3$ ,  $\text{cm}^{-1}$ ) 3098, 3067, 2922, 1592, 1345; HRMS  $m/z$  323.0986 (calcd  $\text{C}_{19}\text{H}_{17}\text{NO}_2\text{S}$ , 323.0980).

***N,N*-Diphenyl-2-methylbenzenesulfonamide (49).** The indicated compound was obtained in a 99% yield as a yellow solid: mp 65-67 °C;  $^1\text{H}$  NMR ( $\text{CDCl}_3$ , 300 MHz)  $\delta$  2.51 (s, 3H), 7.20-7.33 (m, 12H), 7.44 (td,  $J = 7.2, 0.9$  Hz, 1H), 7.83 (d,  $J = 7.8$  Hz, 1H);  $^{13}\text{C}$  NMR (75 MHz,  $\text{CDCl}_3$ )  $\delta$  21.0, 126.3, 127.7, 128.8, 129.5, 130.9, 132.8, 133.3, 138.4, 138.5, 141.7; IR ( $\text{CDCl}_3$ ,  $\text{cm}^{-1}$ ) 3062, 3037, 2933, 1589, 1487; HRMS  $m/z$  323.0986 (calcd  $\text{C}_{19}\text{H}_{17}\text{NO}_2\text{S}$ , 323.0980).

***N,N*-Diphenyl-4-methoxybenzenesulfonamide (50).** The indicated compound was obtained in a 100% yield as a yellow solid: mp 122-123 °C;  $^1\text{H}$  NMR ( $\text{CDCl}_3$ , 300 MHz)  $\delta$  3.86 (s, 3H), 6.93 (dd,  $J = 6.9, 2.1$  Hz, 2H), 7.22-7.34 (m, 10H), 7.32 (dd,  $J = 6.9, 2.1$  Hz, 2H);  $^{13}\text{C}$  NMR (75 MHz,  $\text{CDCl}_3$ )  $\delta$  55.8, 114.3, 127.6, 128.6, 129.5, 130.1, 132.4, 141.8, 163.2; IR ( $\text{CDCl}_3$ ,  $\text{cm}^{-1}$ ) 3076, 3006, 2985, 2945, 2844, 1594, 1493; HRMS  $m/z$  339.0934 (calcd  $\text{C}_{19}\text{H}_{17}\text{NO}_3\text{S}$ , 339.0929).

***N,N*-Diphenyl-4-(trifluoromethyl)benzenesulfonamide (51).** The indicated compound was obtained in a 91% yield as a white solid: mp 128-129 °C; <sup>1</sup>H NMR (CDCl<sub>3</sub>, 300 MHz) δ 7.24-7.37 (m, 10H), 7.75 (d, *J* = 8.7 Hz, 2H), 7.82 (d, *J* = 8.7 Hz, 2H); <sup>13</sup>C NMR (75 MHz, CDCl<sub>3</sub>) δ 123.5 (q, *J* = 271.4 Hz), 126.3 (q, *J* = 3.7 Hz), 128.2, 128.4, 128.6, 129.7, 134.7 (q, *J* = 32.9 Hz), 141.2, 144.2 (q, *J* = 1.3 Hz); IR (CDCl<sub>3</sub>, cm<sup>-1</sup>) 3063, 2919, 1587, 1490; HRMS *m/z* 337.0700 (calcd C<sub>19</sub>H<sub>14</sub>F<sub>3</sub>NO<sub>2</sub>S, 337.0697).

***N,N*-Diphenyl-4-(phenylamino)benzenesulfonamide (52).** The indicated compound was obtained in a 75% yield as a pale yellow solid: mp 206-208 °C; <sup>1</sup>H NMR (acetone-d<sub>6</sub>, 300 MHz) δ 7.03-7.17 (m, 3H), 7.25-7.39 (m, 14H), 7.54 (dt, *J* = 9.0, 2.7 Hz, 2H), 8.11 (s, 1H); <sup>13</sup>C NMR (75 MHz, acetone-d<sub>6</sub>) δ 114.2, 120.6, 123.0, 127.3, 128.6, 129.3, 129.5, 129.6, 129.9, 141.3, 142.3, 149.0; IR (CDCl<sub>3</sub>, cm<sup>-1</sup>) 3367, 3055, 3034, 1743, 1591, 1145; HRMS *m/z* 400.1252 (calcd C<sub>24</sub>H<sub>20</sub>N<sub>2</sub>O<sub>2</sub>S, 400.1245).

***N*-(3-Methoxyphenyl)-*N*-methyl-4-methylbenzenesulfonamide (54).** The indicated compound was obtained in a 91% yield as a colorless oil; <sup>1</sup>H NMR (CDCl<sub>3</sub>, 300 MHz) δ 2.41 (s, 3H), 3.14 (s, 3H), 3.76 (s, 3H), 6.61-6.64 (m, 1H), 6.71 (t, *J* = 2.4 Hz, 1H), 6.79-6.82 (m, 1H), 7.18 (t, *J* = 8.4 Hz, 1H), 7.24 (d, *J* = 8.1 Hz, 2H), 7.46 (d, *J* = 8.4 Hz, 2H); <sup>13</sup>C NMR (75 MHz, CDCl<sub>3</sub>) δ 21.8, 38.4, 55.6, 112.9, 113.3, 118.6, 128.1, 129.5, 133.7, 143.0, 143.8, 160.0; IR (CDCl<sub>3</sub>, cm<sup>-1</sup>) 3058, 3027, 2932, 1589, 1485; HRMS *m/z* 291.0932 (calcd C<sub>15</sub>H<sub>16</sub>NO<sub>3</sub>S, 291.0929).

***N*-Benzyl-*N*-phenyl-4-methylbenzenesulfonamide (55).** The indicated compound was obtained in a 94% yield as a yellow solid: mp 139-140 °C; <sup>1</sup>H NMR (CDCl<sub>3</sub>, 400 MHz) δ 2.44 (s, 3H), 4.74 (s, 2H), 6.98-7.01 (m, 2H), 7.18-7.29 (m, 10H), 7.55 (d, *J* = 8.0 Hz, 2H); <sup>13</sup>C NMR (100 MHz, CDCl<sub>3</sub>) δ 21.9, 54.9, 127.8, 127.9, 128.0, 128.6, 128.7, 129.1, 129.2, 129.7, 135.7, 136.2, 139.2, 143.8; IR (CDCl<sub>3</sub>, cm<sup>-1</sup>) 3062, 3027, 2918, 1595, 1491; HRMS *m/z* 337.1140 (calcd C<sub>20</sub>H<sub>19</sub>NO<sub>2</sub>S, 337.1136).

**Methyl 3-iodo-4-(*N*-phenylmethanesulfonylamino)benzoate (56).** The indicated compound was obtained in a 98% yield as a pale yellow solid: mp 135-137 °C; <sup>1</sup>H NMR



(CDCl<sub>3</sub>, 400 MHz)  $\delta$  3.27 (s, 3H), 3.92 (s, 3H), 7.25-7.27 (m, 1H), 7.36 (t,  $J = 7.2$  Hz, 2H), 7.46 (d,  $J = 7.6$  Hz, 2H), 7.69 (d,  $J = 8.0$  Hz, 1H), 8.10 (dd,  $J = 8.0, 1.2$  Hz, 1H), 8.58 (d,  $J = 2.0$  Hz, 1H); <sup>13</sup>C NMR (100 MHz, CDCl<sub>3</sub>)  $\delta$  41.7, 52.9, 101.7, 126.0, 127.1, 129.6, 130.7, 131.8, 132.0, 140.0, 146.5, 164.9; IR (CDCl<sub>3</sub>, cm<sup>-1</sup>) 3065, 3026, 2952, 2930, 2849, 2256, 1724, 1351; HRMS  $m/z$  430.9693 (calcd C<sub>15</sub>H<sub>14</sub>INO<sub>4</sub>S, 430.9688).

***N*-Phenylsaccharin (57).** The indicated compound was obtained in a 72% yield as a white solid: mp 187-189 °C (lit.<sup>33</sup> 189-191 °C); the <sup>1</sup>H and <sup>13</sup>C NMR spectra match the literature data.<sup>33</sup>

***N*-Phenylphthalimide (59).** The indicated compound was obtained in a 60% yield as a white solid: mp 207-209 °C (lit.<sup>34</sup> 207.9-209.9 °C); the <sup>1</sup>H and <sup>13</sup>C NMR spectra match the literature data.<sup>35</sup>

**Ethyl *N,N*-diphenylcarbamate (60).** The indicated compound was obtained in a 96% yield as a white solid: mp 69-70 °C (lit.<sup>36</sup> 69-70 °C); the <sup>1</sup>H NMR spectrum matches the literature data.<sup>36</sup>

**Ethyl *N*-(4-chloro-2-iodophenyl)-*N*-phenylcarbamate (61).** The indicated compound was obtained in a 93% yield as a colorless oil; <sup>1</sup>H NMR (CDCl<sub>3</sub>, 300 MHz)  $\delta$  1.25 (t,  $J = 7.2$  Hz, 3H), 4.21-4.26 (m, 2H), 7.13-7.19 (m, 2H), 7.25-7.35 (m, 5H), 7.90 (d,  $J = 2.4$  Hz, 1H); <sup>13</sup>C NMR (75 MHz, CDCl<sub>3</sub>)  $\delta$  14.8, 62.8, 100.9, 125.2, 125.8, 128.9, 129.8, 130.7, 133.9, 139.5, 141.5, 143.6, 153.9; IR (CDCl<sub>3</sub>, cm<sup>-1</sup>) 3065, 2980, 2932, 2906, 1721, 1493, 1308; HRMS  $m/z$  440.9684 (calcd C<sub>15</sub>H<sub>13</sub>ClINO<sub>2</sub>, 440.9679).

**(4-*tert*-Butylphenyl) phenyl ether (65).** The indicated compound was obtained in an 85% yield as a colorless oil; the <sup>1</sup>H and <sup>13</sup>C NMR spectra match the literature data.<sup>37</sup>

***N*-(4-Phenoxyphenyl)acetamide (66).** The indicated compound was obtained in a 91% yield as a white solid: mp 130-131 °C (lit.<sup>38</sup> 128-129 °C); the <sup>1</sup>H and <sup>13</sup>C NMR spectra match the literature data.<sup>39</sup>

**2,4-Dimethylphenyl 4-iodophenyl ether (72) and 3,5-dimethylphenyl 4-iodophenyl ether (73).** The indicated compounds were obtained as a 1:1.5 mixture in a 92% yield as a colorless oil;  $^1\text{H}$  NMR ( $\text{CDCl}_3$ , 300 MHz)  $\delta$  2.18 (s, 3H), 2.32 (s, 8H), 2.35 (s, 3H), 6.66-6.69 (m, 5H), 6.76-6.80 (m, 4H), 6.85 (d,  $J = 8.1$  Hz, 1H), 7.02 (d,  $J = 8.1$  Hz, 1H), 7.09 (s, 1H), 7.55-7.65 (m, 5H);  $^{13}\text{C}$  NMR (75 MHz,  $\text{CDCl}_3$ )  $\delta$  16.3, 21.1, 21.6, 84.6, 85.9, 117.1, 119.1, 120.6, 121.1, 125.8, 128.1, 130.2, 132.5, 134.5, 138.7, 138.8, 140.0, 151.5, 156.7, 157.9, 158.7.

**2-Iodophenyl phenyl ether (74).** The indicated compound was obtained in a 90% yield as a pale yellow solid: mp 52-54 °C (lit.<sup>40</sup> 53-54 °C); the  $^1\text{H}$  and  $^{13}\text{C}$  NMR spectra match the literature data.<sup>40</sup>

**2-Naphthyl phenyl ether (77).** The indicated compound was obtained in an 84% yield as a pale yellow solid: mp 46-47 °C (lit.<sup>41</sup> 45-46 °C);  $^1\text{H}$  NMR ( $\text{CDCl}_3$ , 300 MHz)  $\delta$  7.07 (d,  $J = 7.8$  Hz, 2H), 7.14 (t,  $J = 7.5$  Hz, 1H), 7.24-7.47 (m, 6H), 7.69 (d,  $J = 7.8$  Hz, 1H), 7.80-7.84 (m, 2H);  $^{13}\text{C}$  NMR (75 MHz,  $\text{CDCl}_3$ )  $\delta$  114.3, 119.4, 120.2, 123.7, 124.9, 126.7, 127.4, 127.9, 130.0, 130.1, 130.4, 134.5, 155.3, 157.4.

**Benzyl phenyl ether (78).** The indicated compound was obtained in a 25% yield as a colorless oil; the  $^1\text{H}$  and  $^{13}\text{C}$  NMR spectra match the literature data.<sup>42</sup>

**2-Bromobenzyl phenyl ether (79).** The indicated compound was obtained in a 36% yield as a pale yellow solid: mp 35-37 °C (lit.<sup>43</sup> 34-36 °C); the  $^1\text{H}$  and  $^{13}\text{C}$  NMR spectra match the literature data.<sup>44</sup>

**4-Phenoxybenzyl alcohol (80).** The indicated compound was obtained in a 36% yield as a white solid: mp 54-55 °C (lit.<sup>45</sup> 54.5 °C);  $^1\text{H}$  NMR ( $\text{CDCl}_3$ , 300 MHz)  $\delta$  1.93 (s, 1H), 4.64 (s, 2H), 7.00 (dd,  $J = 9.0, 2.1$  Hz, 4H), 7.09 (t,  $J = 7.2$  Hz, 1H), 7.30-7.35 (m, 4H);  $^{13}\text{C}$  NMR (75 MHz,  $\text{CDCl}_3$ )  $\delta$  65.1, 119.1, 119.2, 123.5, 128.9, 130.0, 135.9, 157.0,

157.4; IR (CDCl<sub>3</sub>, cm<sup>-1</sup>) 3385, 063, 3053, 2949, 2887, 1591, 1491; HRMS m/z 200.0840 (calcd C<sub>13</sub>H<sub>12</sub>O<sub>2</sub>, 200.0836).

**Diphenyl sulfide (81).** The indicated compound was obtained in a 70% yield as a colorless oil; the <sup>1</sup>H and <sup>13</sup>C NMR spectra match the literature data.<sup>46</sup>

**3-Methoxyphenyl phenyl sulfide (82).** The indicated compound was obtained in a 66% yield as a colorless oil; <sup>1</sup>H NMR (CDCl<sub>3</sub>, 300 MHz) δ 3.74 (s, 3H), 6.74-6.78 (m, 1H), 6.85-6.92 (m, 2H), 7.17-7.38 (m, 6H); <sup>13</sup>C NMR (75 MHz, CDCl<sub>3</sub>) δ 55.5, 113.0, 116.1, 123.2, 127.5, 129.5, 130.2, 131.7, 135.5, 137.5, 160.3; IR (CDCl<sub>3</sub>, cm<sup>-1</sup>) 3059, 3002, 2957, 2935, 2833, 1588, 1476; HRMS m/z 216.0611 (calcd C<sub>13</sub>H<sub>12</sub>OS, 216.0608).

**Phenyl 2-methoxybenzoate (87).** The indicated compound was obtained in an 84% yield as a pale yellow solid: mp 54-56 °C; <sup>1</sup>H NMR (CDCl<sub>3</sub>, 300 MHz) δ 3.92 (s, 3H), 7.01-7.06 (m, 2H), 7.20-7.27 (m, 3H), 7.38-7.56 (m, 3H), 8.00 (d, *J* = 7.2 Hz, 1H); <sup>13</sup>C NMR (75 MHz, CDCl<sub>3</sub>) δ 56.3, 112.5, 120.4, 122.1, 125.9, 129.6, 132.4, 134.5, 151.2, 160.1, 164.6; IR (CDCl<sub>3</sub>, cm<sup>-1</sup>) 3071, 2963, 2941, 2839, 1743, 1487; HRMS m/z 228.0789 (calcd C<sub>14</sub>H<sub>12</sub>O<sub>3</sub>, 228.0786).

**3,4-Dimethylphenyl 4-iodobenzoate (88).** The indicated compound was obtained in an 81% yield as a pale yellow solid: mp 79-80 °C; <sup>1</sup>H NMR (CDCl<sub>3</sub>, 300 MHz) δ 2.28 (s, 3H), 2.29 (s, 3H), 6.93 (dd, *J* = 6.1, 2.4 Hz, 1H), 6.99 (d, *J* = 2.4 Hz, 1H), 7.18 (d, *J* = 8.1 Hz, 1H), 7.85-7.93 (m, 4H); <sup>13</sup>C NMR (75 MHz, CDCl<sub>3</sub>) δ 19.5, 20.2, 101.7, 118.8, 122.7, 129.5, 130.7, 131.7, 134.6, 138.1, 138.3, 148.9, 165.3; IR (CDCl<sub>3</sub>, cm<sup>-1</sup>) 3085, 2970, 2935, 1728; HRMS m/z 351.9965 (calcd C<sub>15</sub>H<sub>13</sub>IO<sub>2</sub>, 351.9960).

**Phenyl 2-iodo-5-methylbenzoate (90).** The indicated compound was obtained in an 89% yield as a yellow oil; <sup>1</sup>H NMR (CDCl<sub>3</sub>, 300 MHz) δ 2.37 (s, 3H), 7.01-7.05 (m, 1H), 7.24-7.29 (m, 3H), 7.40-7.45 (m, 2H), 7.83 (d, *J* = 1.8 Hz, 1H), 7.91 (d, *J* = 8.1 Hz, 1H); <sup>13</sup>C NMR (75 MHz, CDCl<sub>3</sub>) δ 21.1, 90.7, 121.8, 126.3, 129.7, 132.5, 134.5, 138.5, 141.6,

151.0, 165.3; IR (CDCl<sub>3</sub>, cm<sup>-1</sup>) 3059, 3042, 2952, 2921, 2854, 1742, 1591; HRMS m/z 337.9808 (calcd C<sub>14</sub>H<sub>11</sub>IO<sub>2</sub>, 337.9803).

**Phenyl phenylacetate (92).** The indicated compound was obtained in a 45% yield as a white solid: mp 39-40 °C (lit.<sup>47</sup> 40-41.5 °C); the <sup>1</sup>H NMR spectrum matches the literature data.<sup>47</sup>

**Phenyl benzenesulfonate (93).** The indicated compound was obtained in a 33 % yield as a colorless oil: <sup>13</sup>C NMR (75 MHz, CDCl<sub>3</sub>) δ 120.7, 122.6, 127.4, 128.7, 129.3, 129.8, 134.4, 149.8. The <sup>1</sup>H NMR spectrum matches the literature data.<sup>48</sup>

## References

- (1) (a) Peña, D.; Pérez, D.; Guitián, E.; Castedo, L. *J. Am. Chem. Soc.* **1999**, *121*, 5827-5828. (b) Yoshida, H.; Sugiura, S.; Kunai, A. *Org. Lett.* **2002**, *4*, 2767-2769.
- (2) Liu, Z.; Larock, R. C. *Org. Lett.* **2003**, *5*, 4673-4675.
- (3) Liu, Z.; Larock, R. C. *Org. Lett.* **2004**, *6*, 99-102.
- (4) Rahman, M. T.; Roy, A. R.; Hossain, K. M. *J. Organomet. Chem.* **1977**, *127*, 105-110.
- (5) Kataoka, N.; Shelby, Q.; Stambuli, J. P.; Hartwig, J. F. *J. Org. Chem.* **2002**, *67*, 5553-5566.
- (6) Yoshida, K.; Fueno, T. *J. Org. Chem.* **1972**, *37*, 4145-4147.
- (7) Gajare, A. S.; Toyota, K.; Yoshifuji, M.; Ozawa, F. *J. Org. Chem.* **2004**, *69*, 6504-6506.
- (8) Anderson, K. W.; Mendez-Perez, M.; Priego, J.; Buchwald, S. L. *J. Org. Chem.* **2003**, *68*, 9563-9573.
- (9) Kuwano, R.; Utsunomiya, M.; Hartwig, J. F. *J. Org. Chem.* **2002**, *67*, 6479-6486.
- (10) Zhang, H.; Cai, Q.; Ma, D. *J. Org. Chem.* **2005**, *70*, 5164-5173.
- (11) Kosynkin, D. V.; Tour, J. M. *Org. Lett.* **2001**, *3*, 991-992.
- (12) Quach, T. D.; Batey, R. A. *Org. Lett.* **2003**, *5*, 4397-4400.
- (13) Desmarests, C.; Schneider, R.; Fort, Y. *J. Org. Chem.* **2002**, *67*, 3029-3036.
- (14) Urgaonkar, S.; Verkade, J. G. *J. Org. Chem.* **2004**, *69*, 9135-9142.
- (15) Moreno-Mañas, M.; Morral, L.; Pleixats, R. *J. Org. Chem.* **1998**, *63*, 6160-6166.
- (16) Chen, C.; Yang, L.-M. *Org. Lett.* **2005**, *7*, 2209-2211.
- (17) Kataoka, N.; Quinetta, S.; Stambuli, J. P.; Hartwig, J. F. *J. Org. Chem.* **2002**, *67*, 5553-5566.
- (18) Haga, K.; Iwaya, K.; Kaneko, R. *Bull. Chem. Soc. Jpn.* **1986**, *59*, 803-807.
- (19) Urgaonkar, S.; Xu, J.-H.; Verkade, J. G. *J. Org. Chem.* **2003**, *68*, 8416-8423.
- (20) Sezen, B.; Sames, D. *J. Am. Chem. Soc.* **2003**, *125*, 5274-5275.
- (21) Rosevear, J.; Wilshire, J. F. K. *Austral. J. Chem.* **1984**, *37*, 2489-2497.
- (22) Oae, S.; Iida, K.; Shinhama, K.; Takata, T. *Bull. Chem. Soc. Jpn.* **1981**, *54*, 2374-2378.

- (23) Begtrup, M.; Elguero, J.; Faure, R.; Camps, P. Estopa, C. *Magn. Reson. Chem.* **1988**, *26*, 134-151.
- (24) Ma, D.; Cai, Q.; Zhang, H. *Org. Lett.* **2003**, *5*, 2453-2455.
- (25) Ali, M. H.; Buchwald, S. L. *J. Org. Chem.* **2001**, *66*, 2560-2565.
- (26) Suwa, T.; Sugiyama, E.; Shibata, I.; Baba, A. *Synthesis* **2000**, 789-800.
- (27) Bordwell, F.; Hughes, D. L. *J. Am. Chem. Soc.* **1984**, *106*, 3234-3240.
- (28) Ju, Y.; Varma, R. *Org. Lett.* **2005**, *7*, 2409-2411.
- (29) Desmarets, C.; Schneider, R.; Fort, Y. *J. Org. Chem.* **2002**, *67*, 3029-3036.
- (30) Lee, D.-Y.; Hartwig, J. F. *Org. Lett.* **2005**, *7*, 1165-1172.
- (31) Beller, M.; Breindl, C.; Riermeier, T. H.; Tillack, A. *J. Org. Chem.* **2001**, *66*, 1403-1412.
- (32) Bachmann, S.; Fielenbach, D.; Jorgensen, K. A. *Org. Biomol. Chem.* **2004**, 3044-3049.
- (33) Togo, H.; Hoshina, Y.; Muraki, T.; Nakayama, H.; Yokoyama, M. *J. Org. Chem.* **1998**, *63*, 5193-5120.
- (34) Le, Z.-G.; Chen, Z.-C.; Hu, Y.; Zheng, Q.-G. *Synthesis* **2004**, 995-998.
- (35) Chiang, G. C. H.; Olsson, T. *Org. Lett.* **2004**, *6*, 3079-3082.
- (36) Yoshida, Y.; Ishii, S.; Akinori, K.; Yamashita, T.; Yano, M.; Inoue, S. *Bull. Chem. Soc. Jpn.* **1988**, *61*, 2913-2916.
- (37) He, H.; Wu, Y.-J. *Tetrahedron Lett.* **2003**, *44*, 3445-3446.
- (38) Szajnman, S. H.; Yan, W.; Bailey, B. N.; Docampo, R.; Elhalem, E.; Rodriguez, J. B. *J. Med. Chem.* **2000**, *43*, 1826-1840.
- (39) Dickerson, T. J.; Tremblay, M. R.; Hoffman, T. Z.; Ruiz, D. I.; Janda, K. D. *J. Am. Chem. Soc.* **2003**, *125*, 15395-15401.
- (40) Parisien, M.; Valette, D.; Fagnou, K.; *J. Org. Chem.* **2005**, *70*, 7578-7584.
- (41) Barton, D. H. R.; Finet, J. P.; Giannotti, C.; Halley, F. *J. Chem. Soc., Perkin I* **1987**, 241-249.
- (42) Shintou, T.; Mukaiyama, T. *J. Am. Chem. Soc.* **2004**, *126*, 7359-7367.
- (43) Huston, R. C.; Neeley, A.; Fayerweather, B. L.; D'Arcy, H. M.; Maxfield, F. H.; Ballard, M. M.; Lewis, W. C. *J. Am. Chem. Soc.* **1933**, *55*, 2146-2149.

- (44) Campeau, L.-C.; Parisien, M.; Leblanc, M.; Fagnou, K. *J. Am. Chem. Soc.* **2004**, *126*, 9186-9187.
- (45) Haydock, D. B.; Mulholland, T. P. C.; Telford, B.; Thorp, J. M.; Wain, J. S. *Eur. J. Med. Chem.* **1984**, *19*, 205-214.
- (46) Taniguchi, N. *J. Org. Chem.* **2004**, *69*, 6904-6906.
- (47) Bordwell, F. G.; Fried, H. E. *J. Org. Chem.* **1991**, *56*, 4218-4230.
- (48) Choi, J. H.; Lee, B. C.; Lee, H. W.; Lee, I. *J. Org. Chem.* **2002**, *67*, 1277-1281.

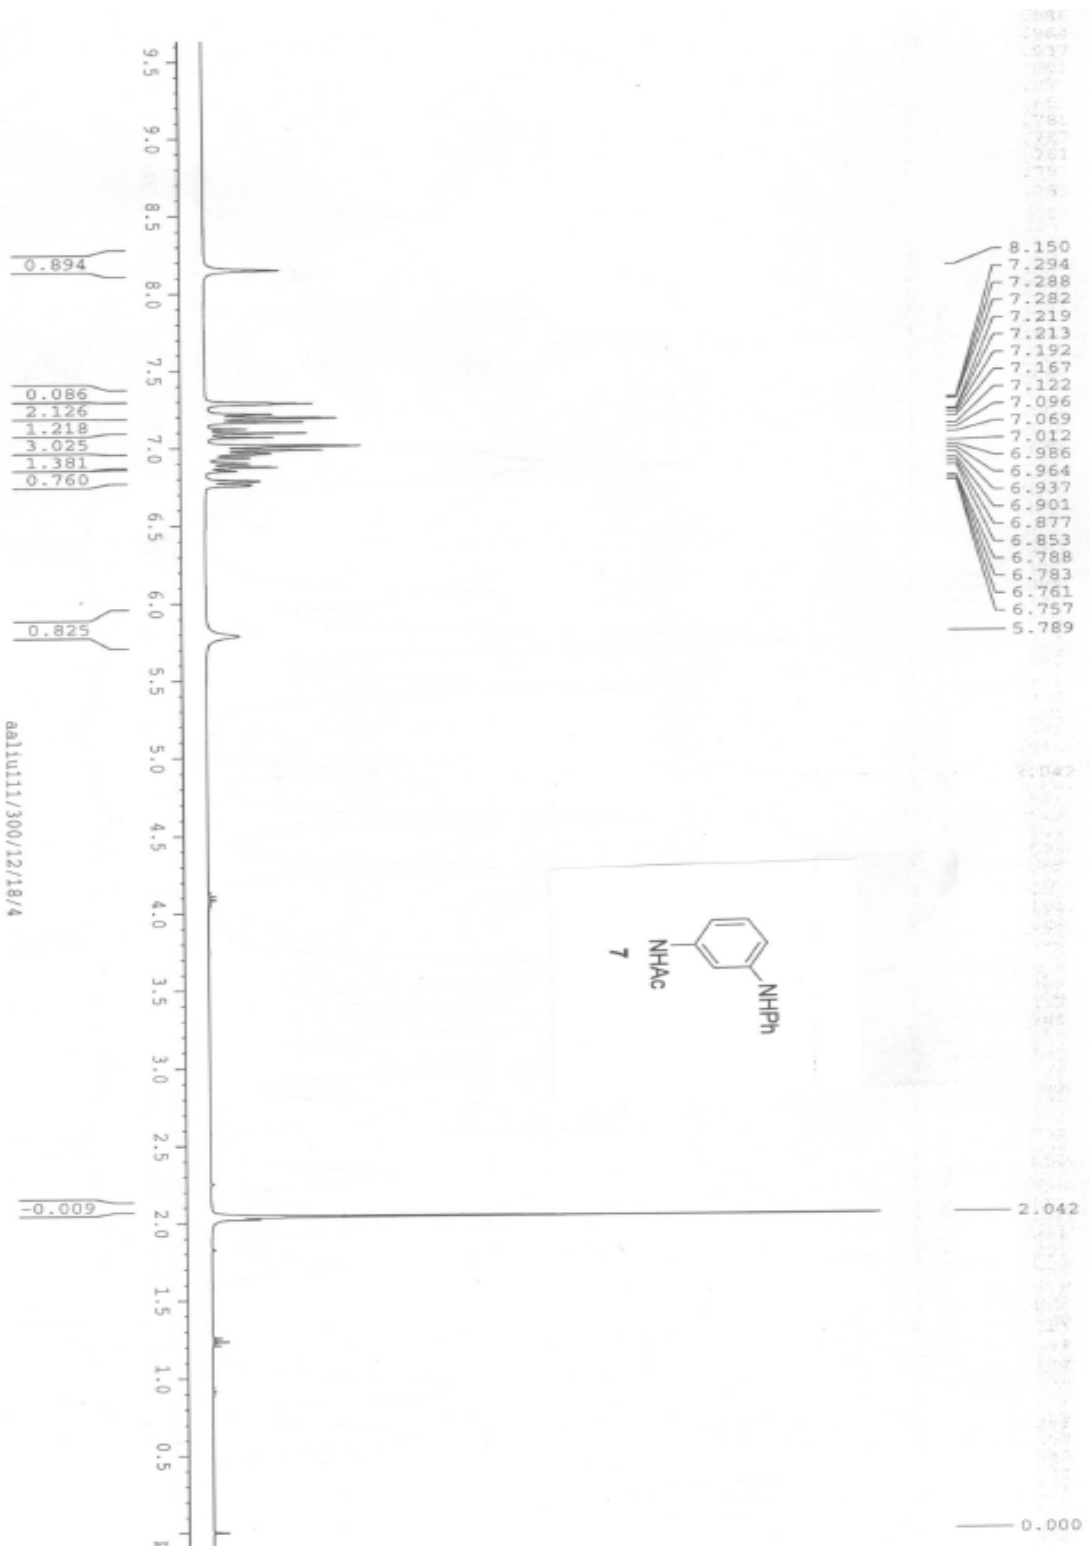



aal1u112/300/12/18/4

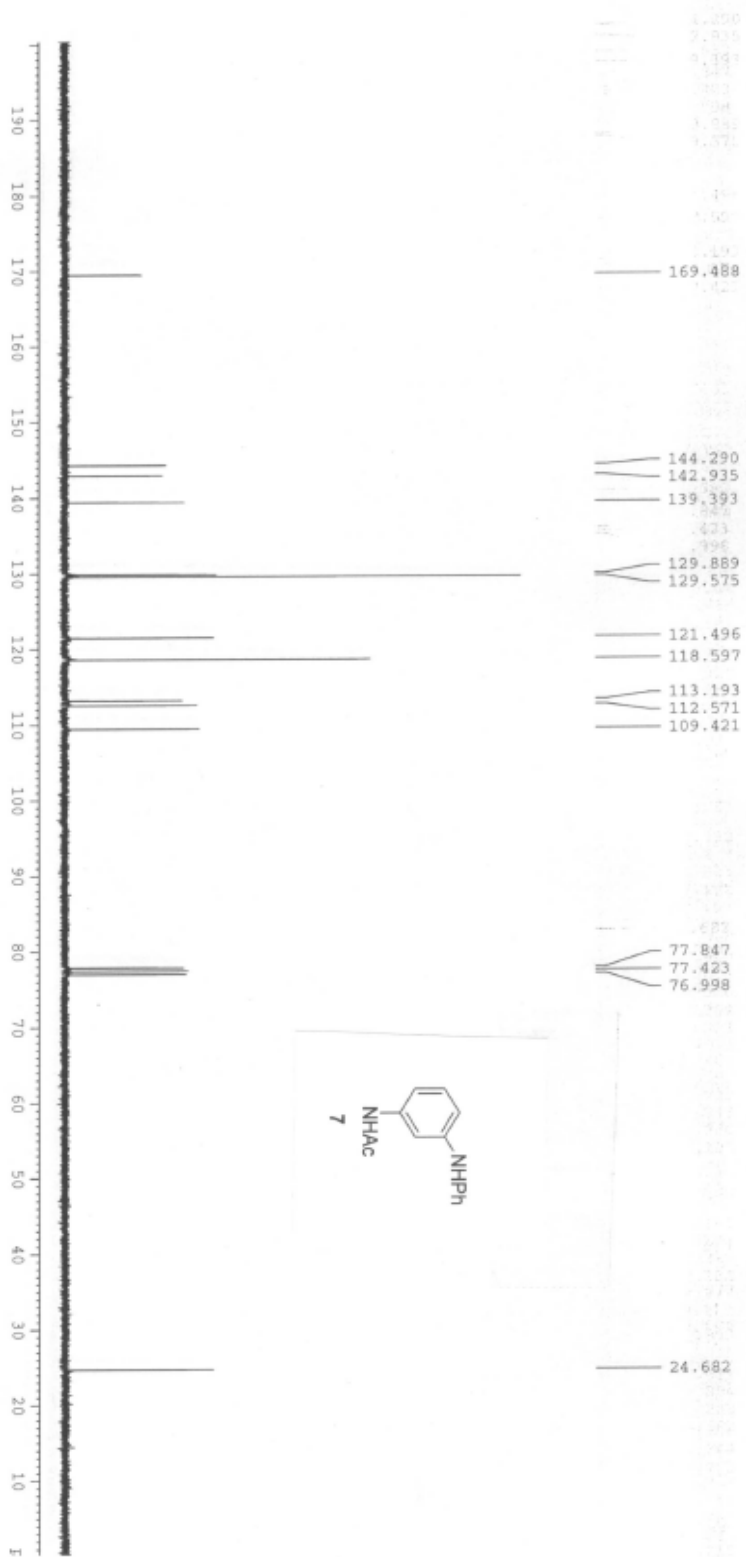

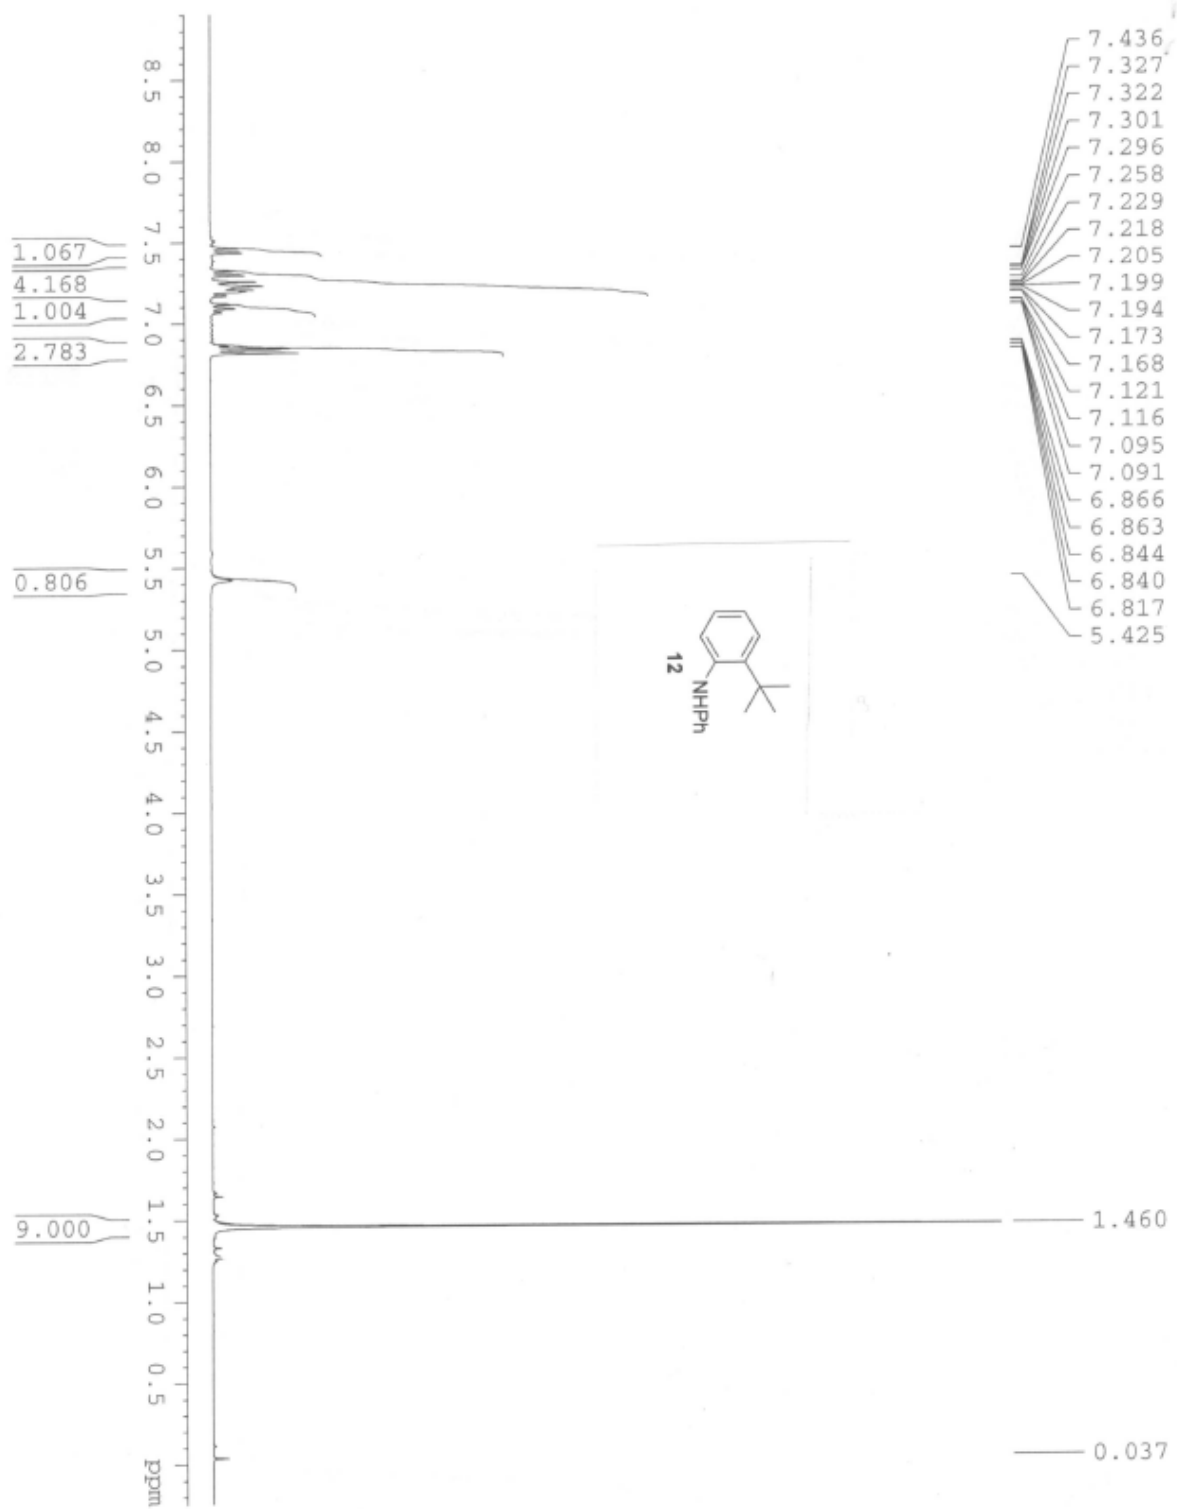

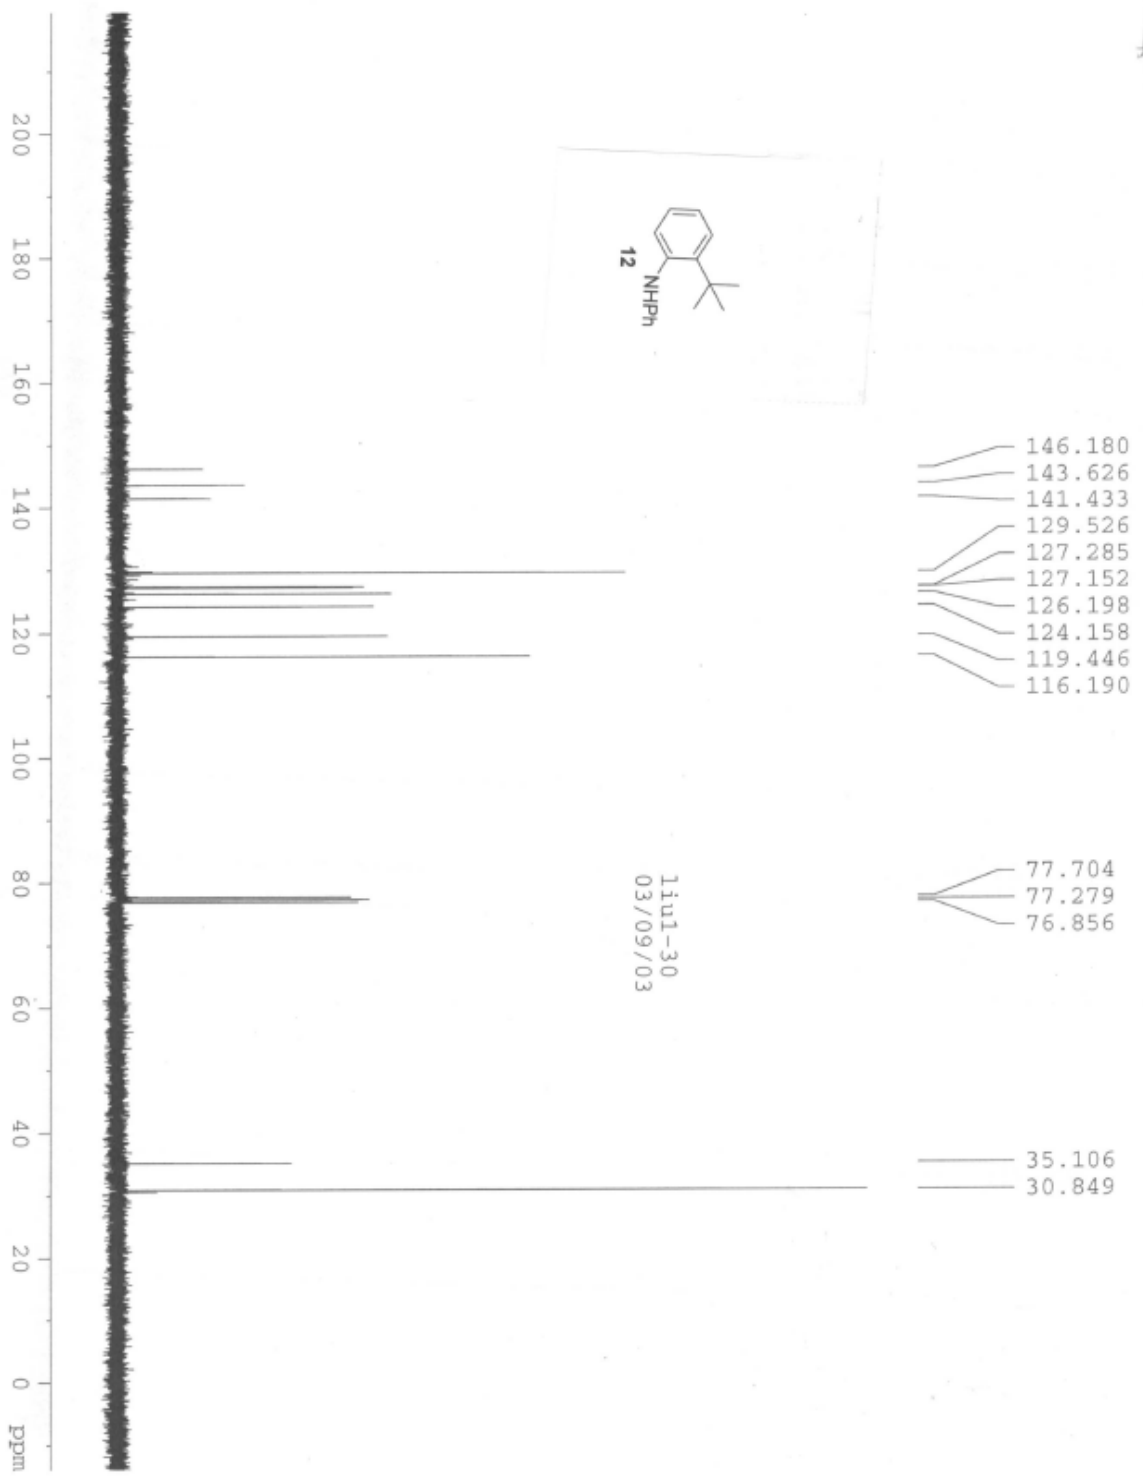

alliu186/300/12/07/05

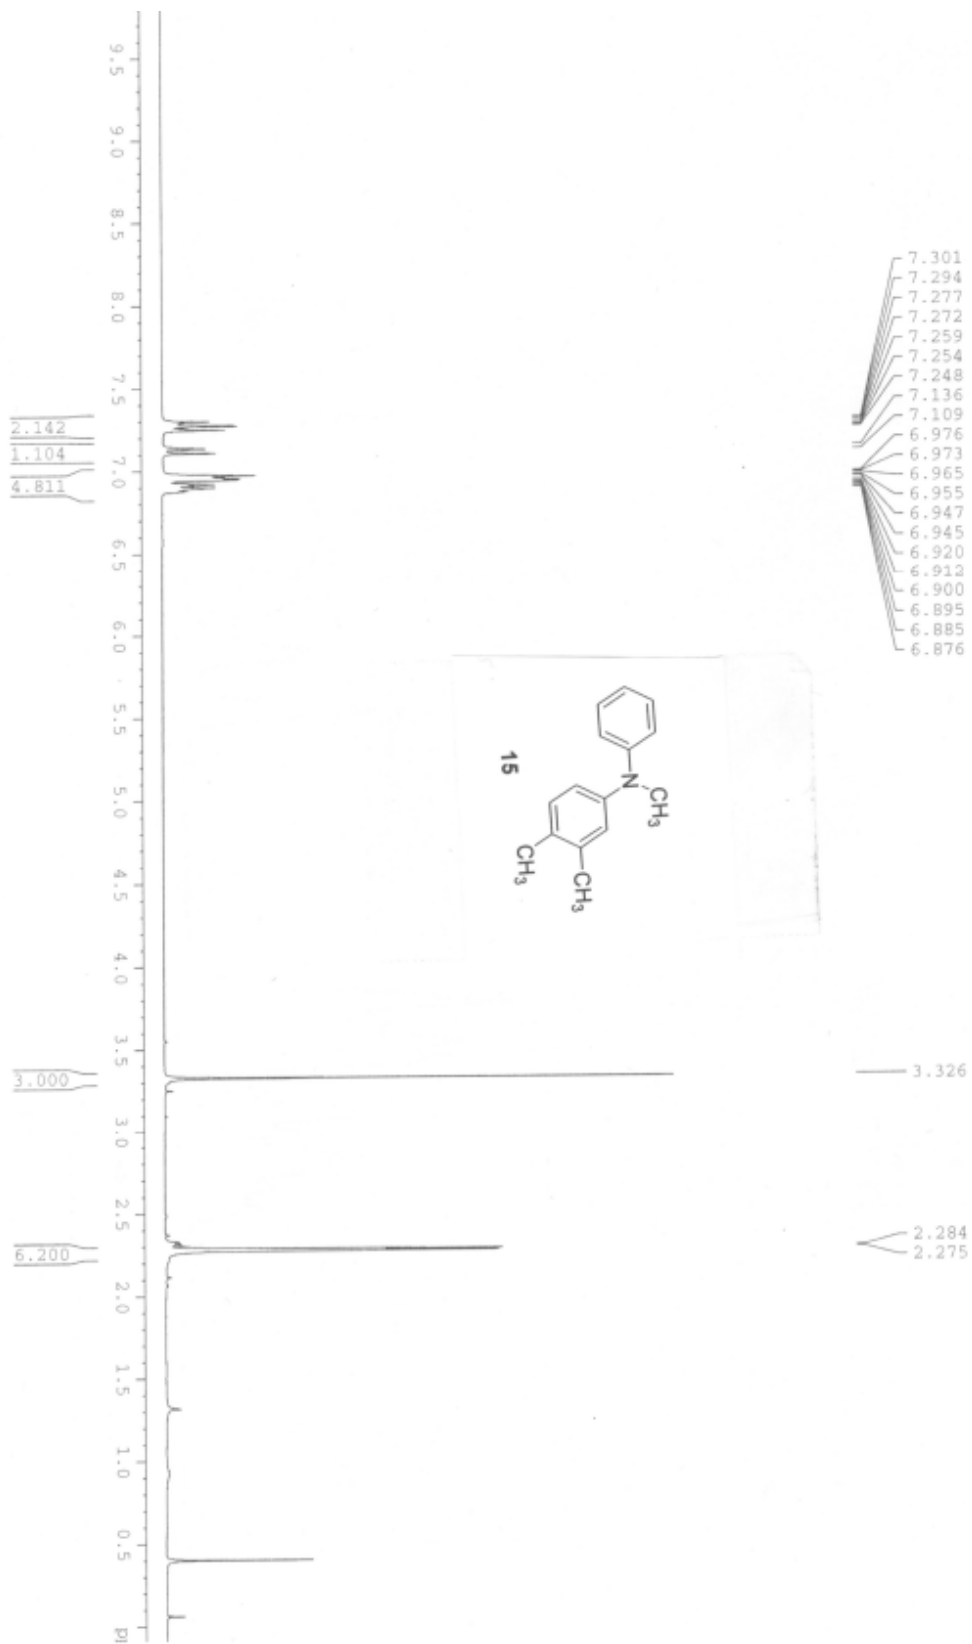

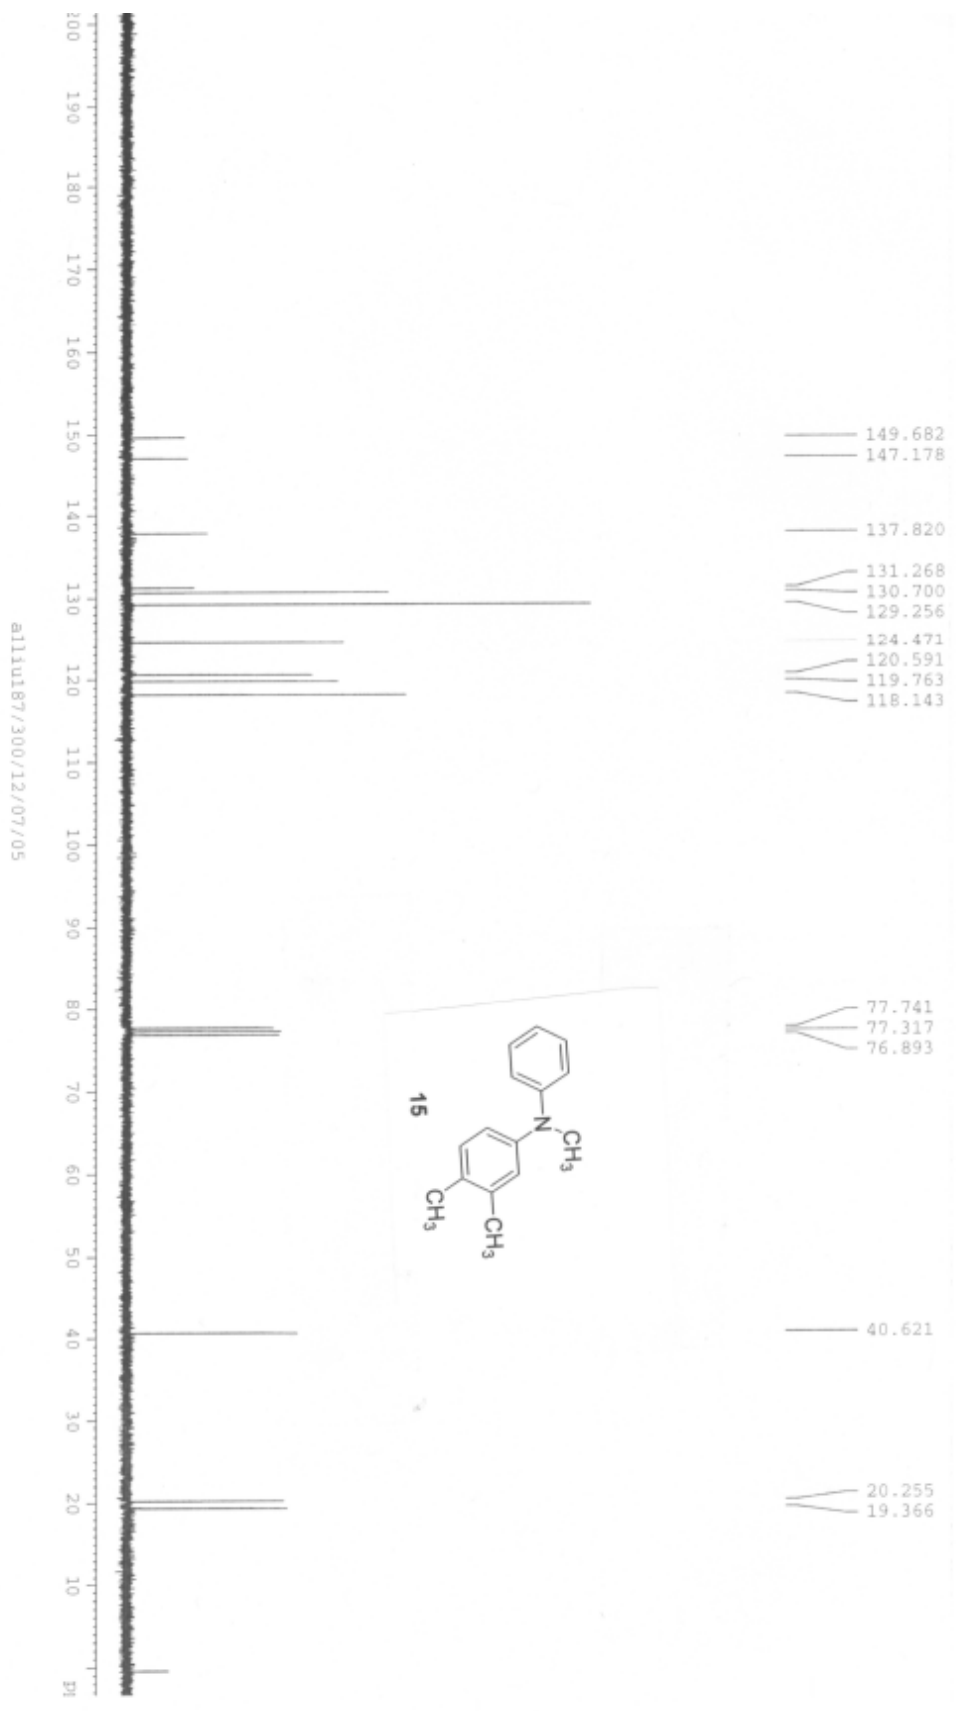

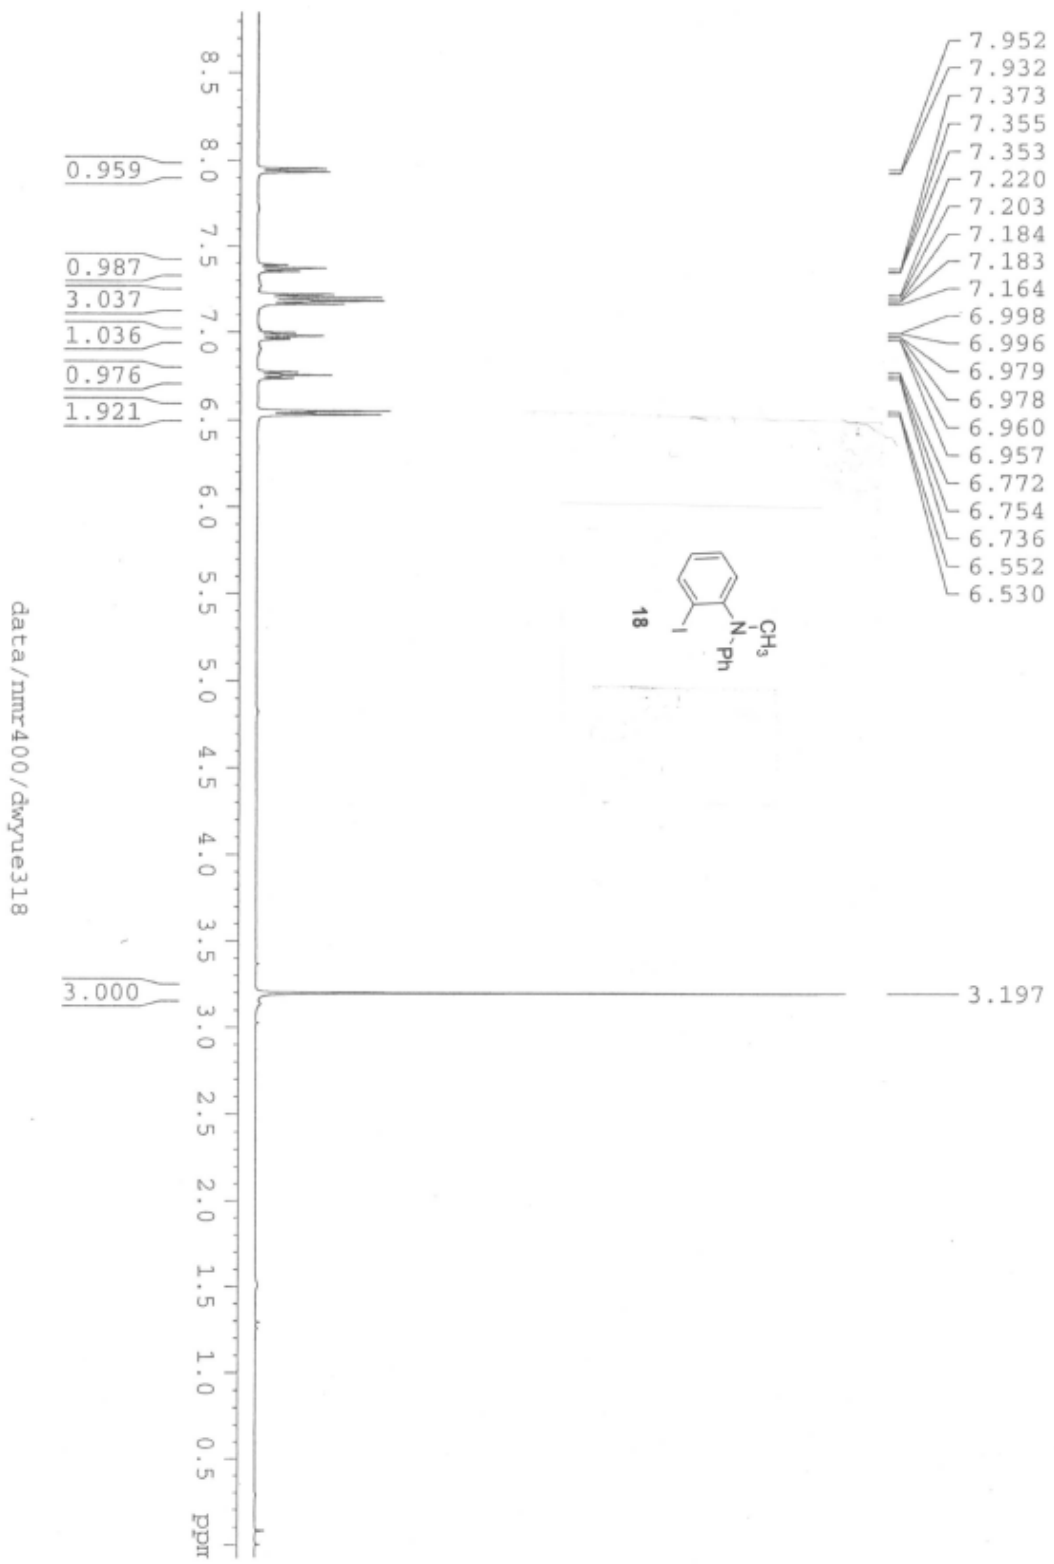

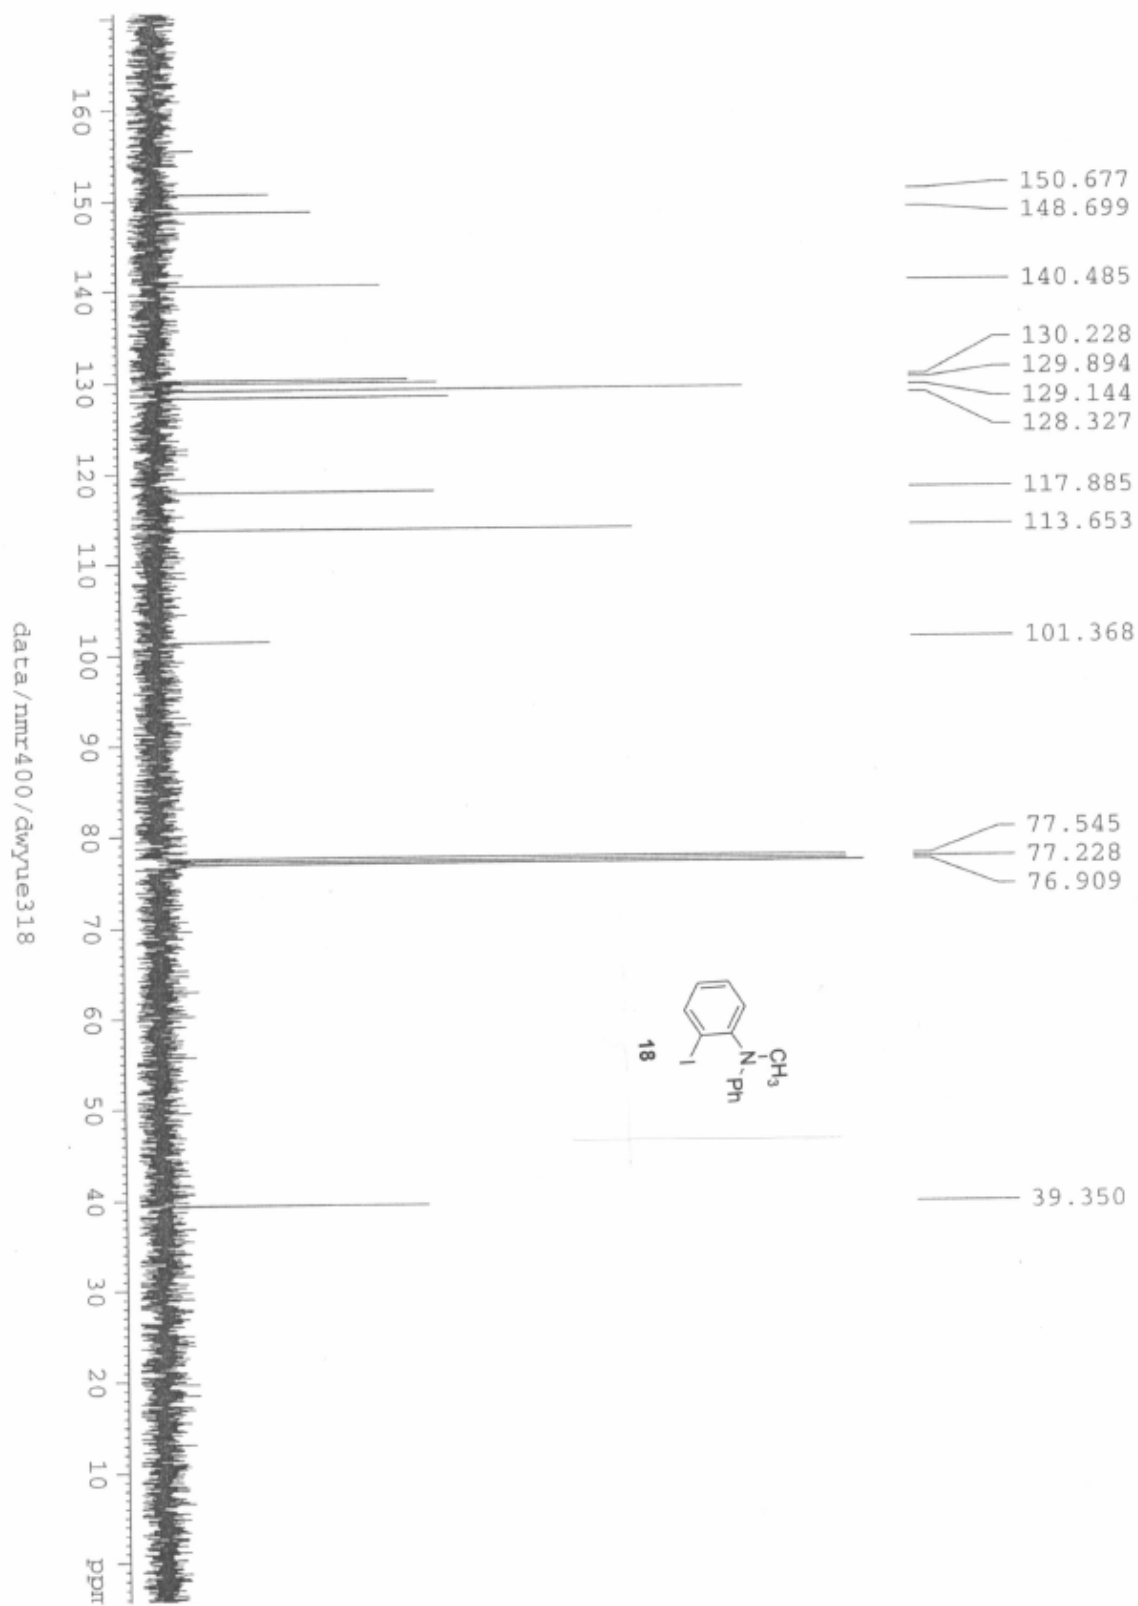

0111107/300/12/11/05

9.5 9.0 8.5 8.0 7.5 7.0 6.5 6.0 5.5 5.0 4.5 4.0 3.5 3.0 2.5 2.0 1.5 1.0 0.5 0.0 F

3.732  
5.973

2.928

12.141

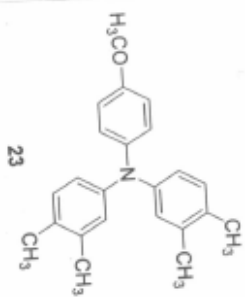

7.224  
7.030  
7.001  
6.975  
6.948  
6.821  
6.808  
6.801  
6.785  
6.778  
6.767  
6.741

3.779

2.194  
2.145

0.000



a1111u8/300/12/11/05

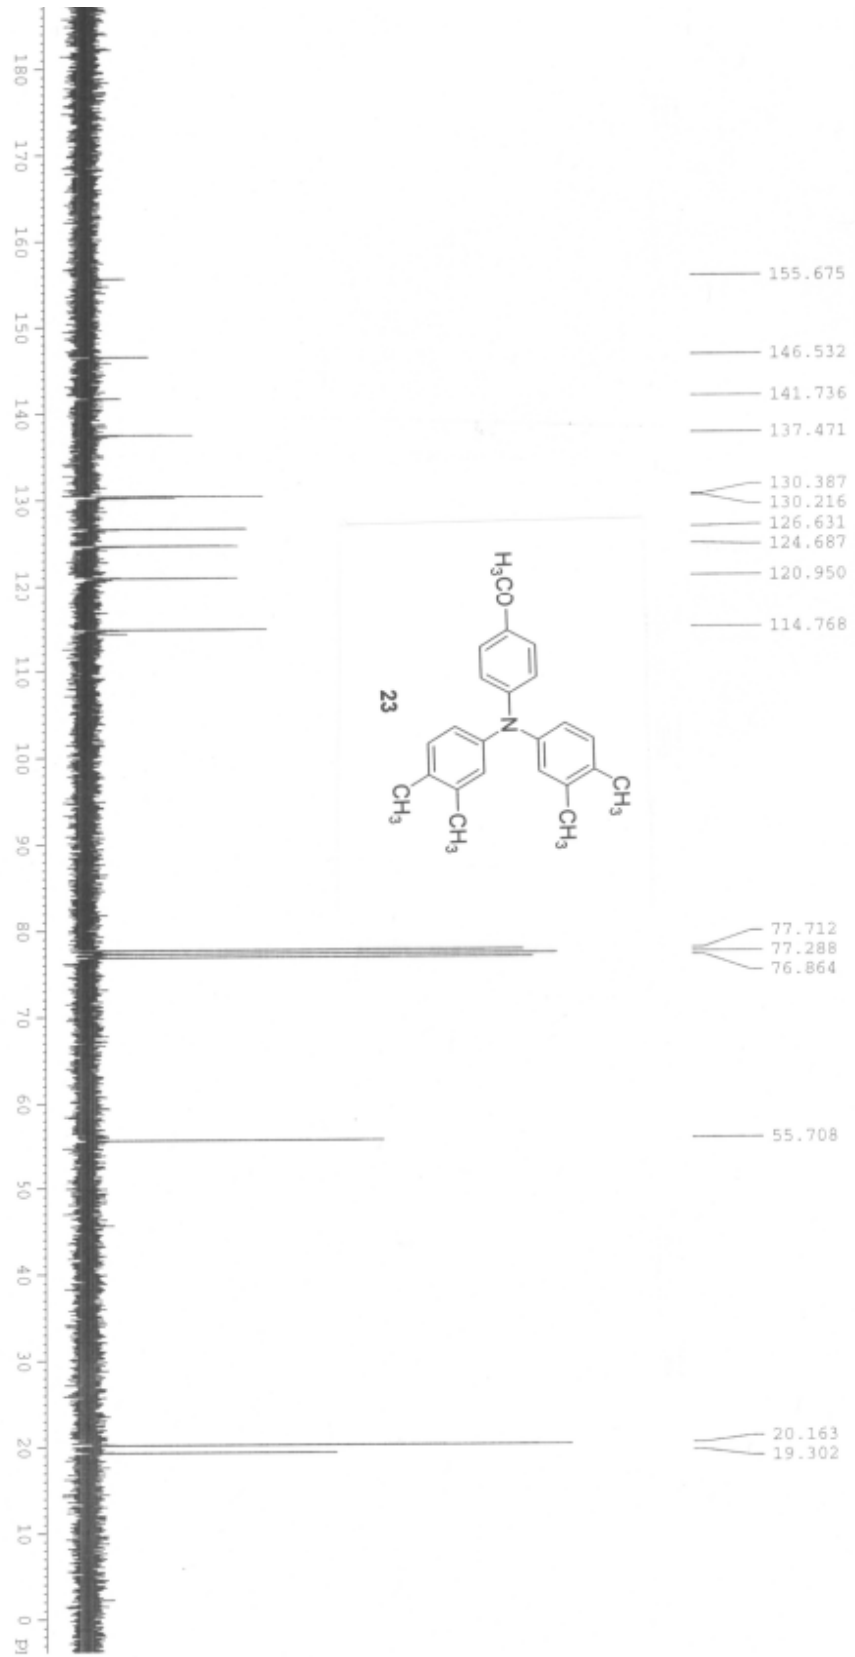

2011101/300/12/08/05

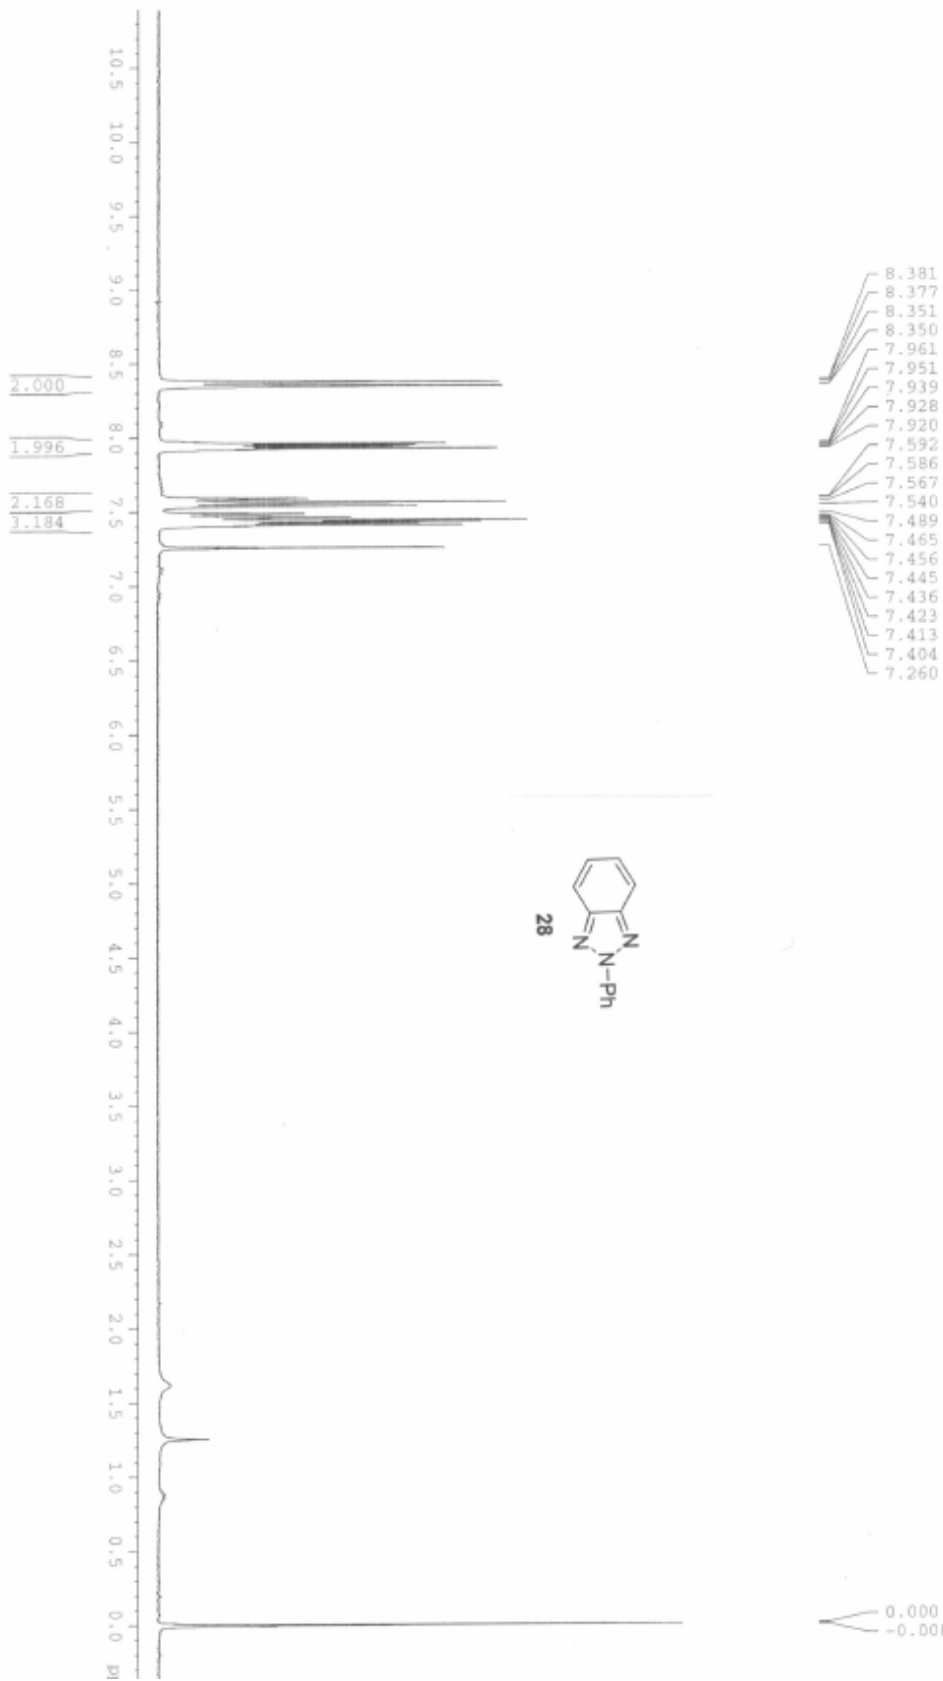

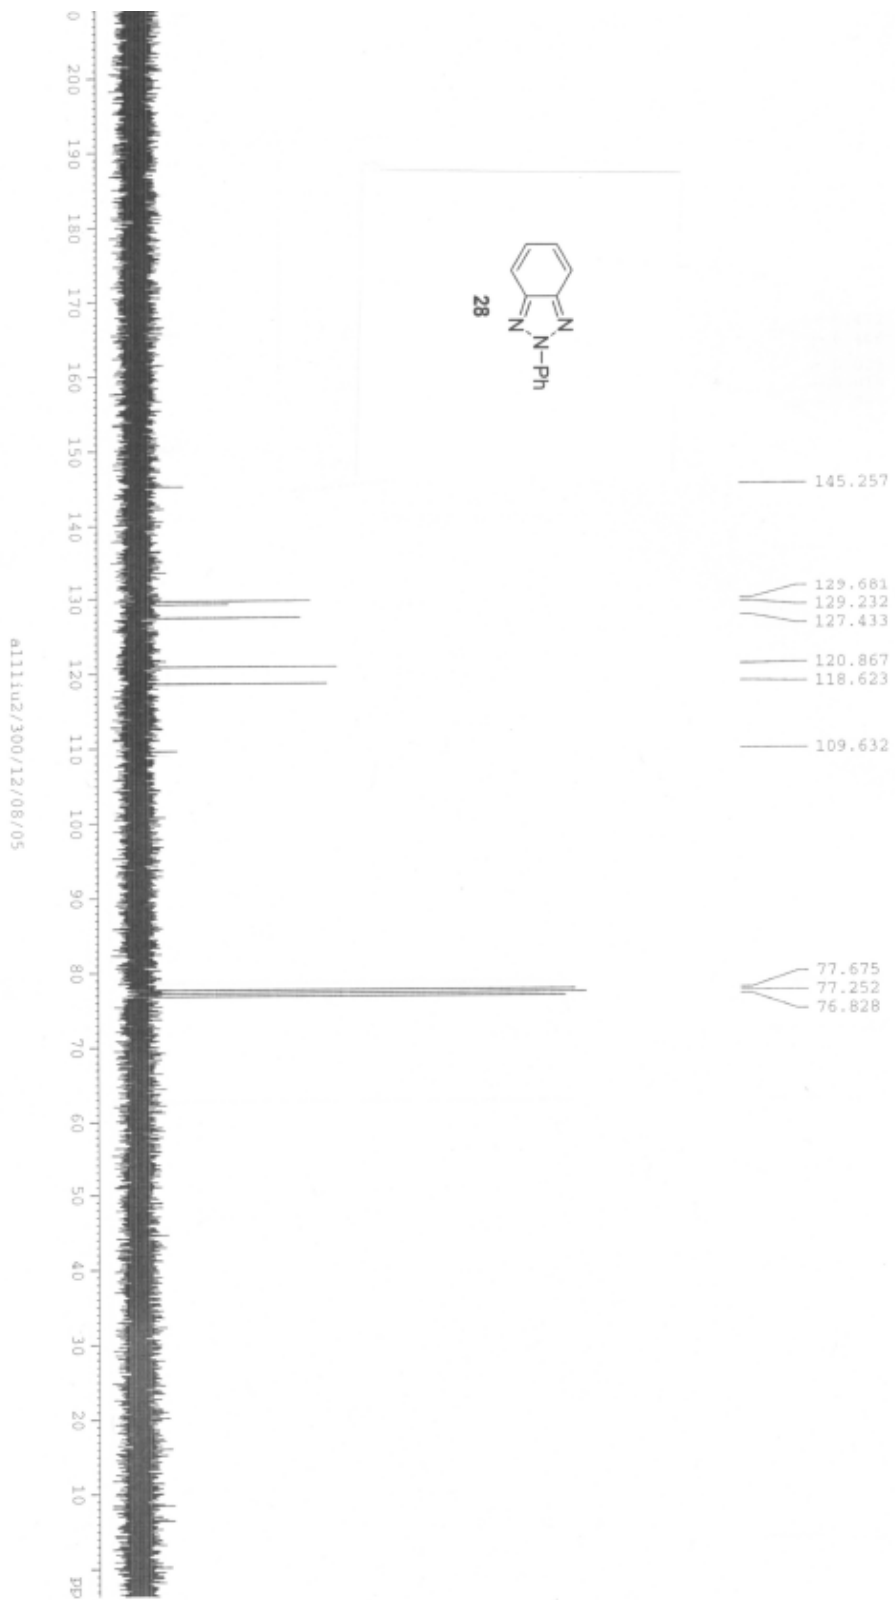

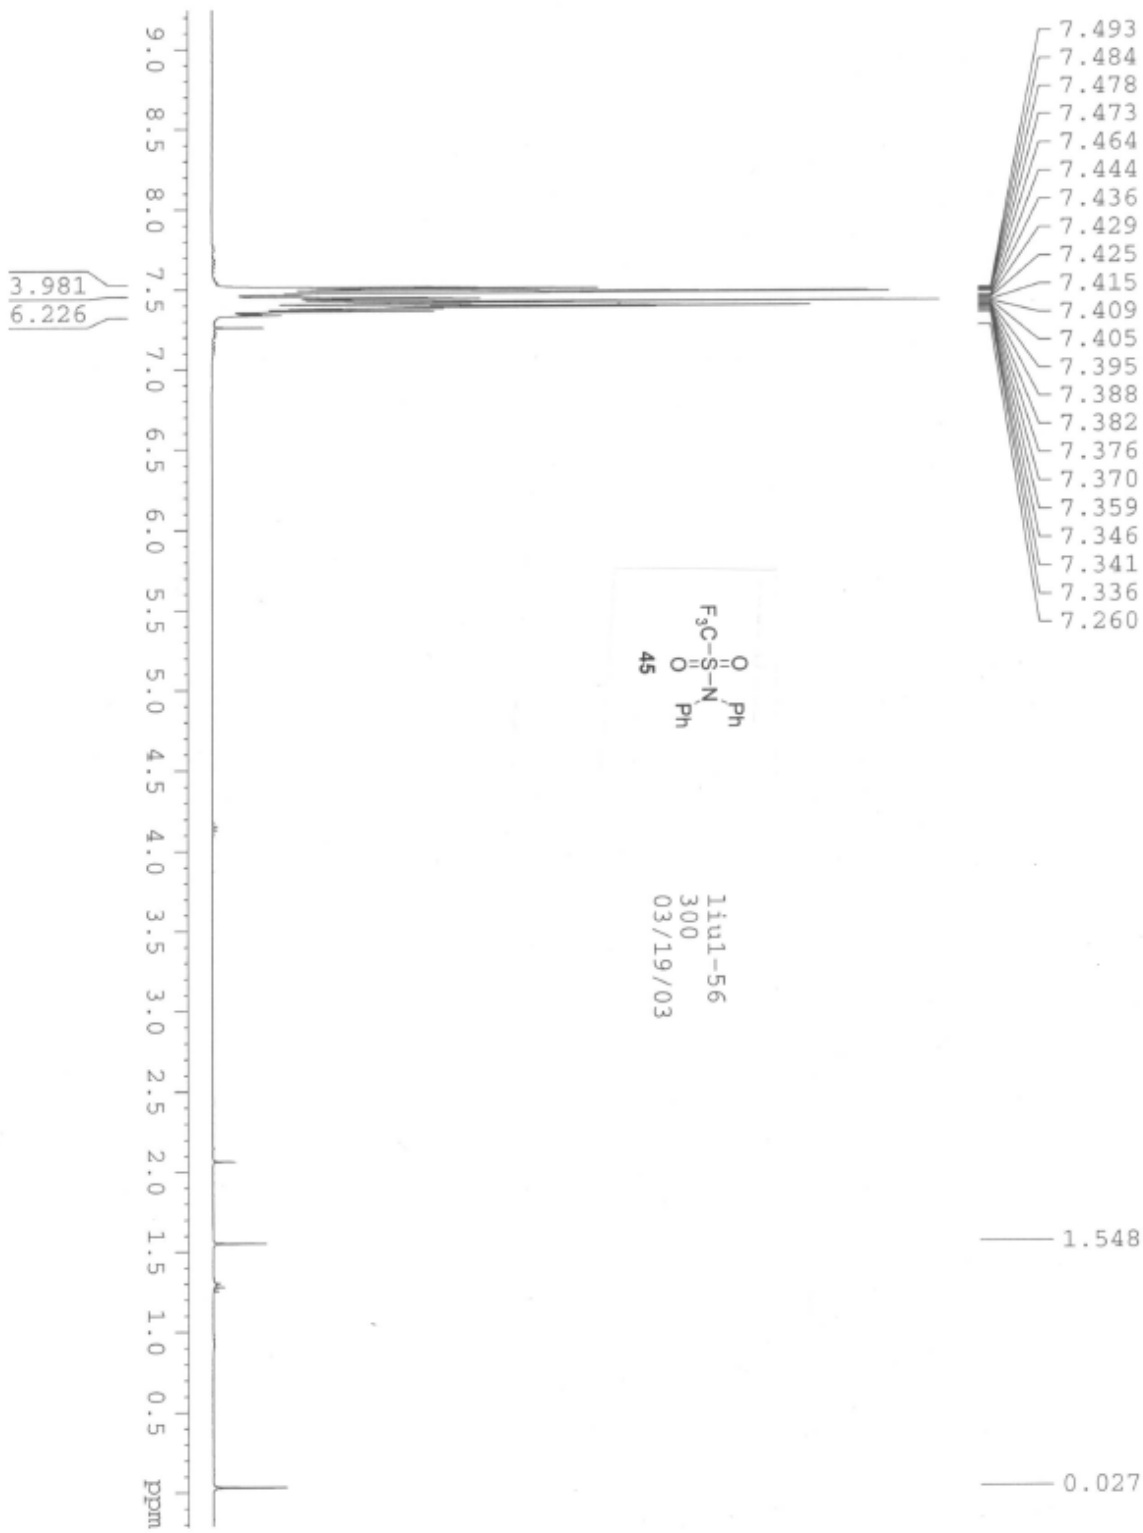

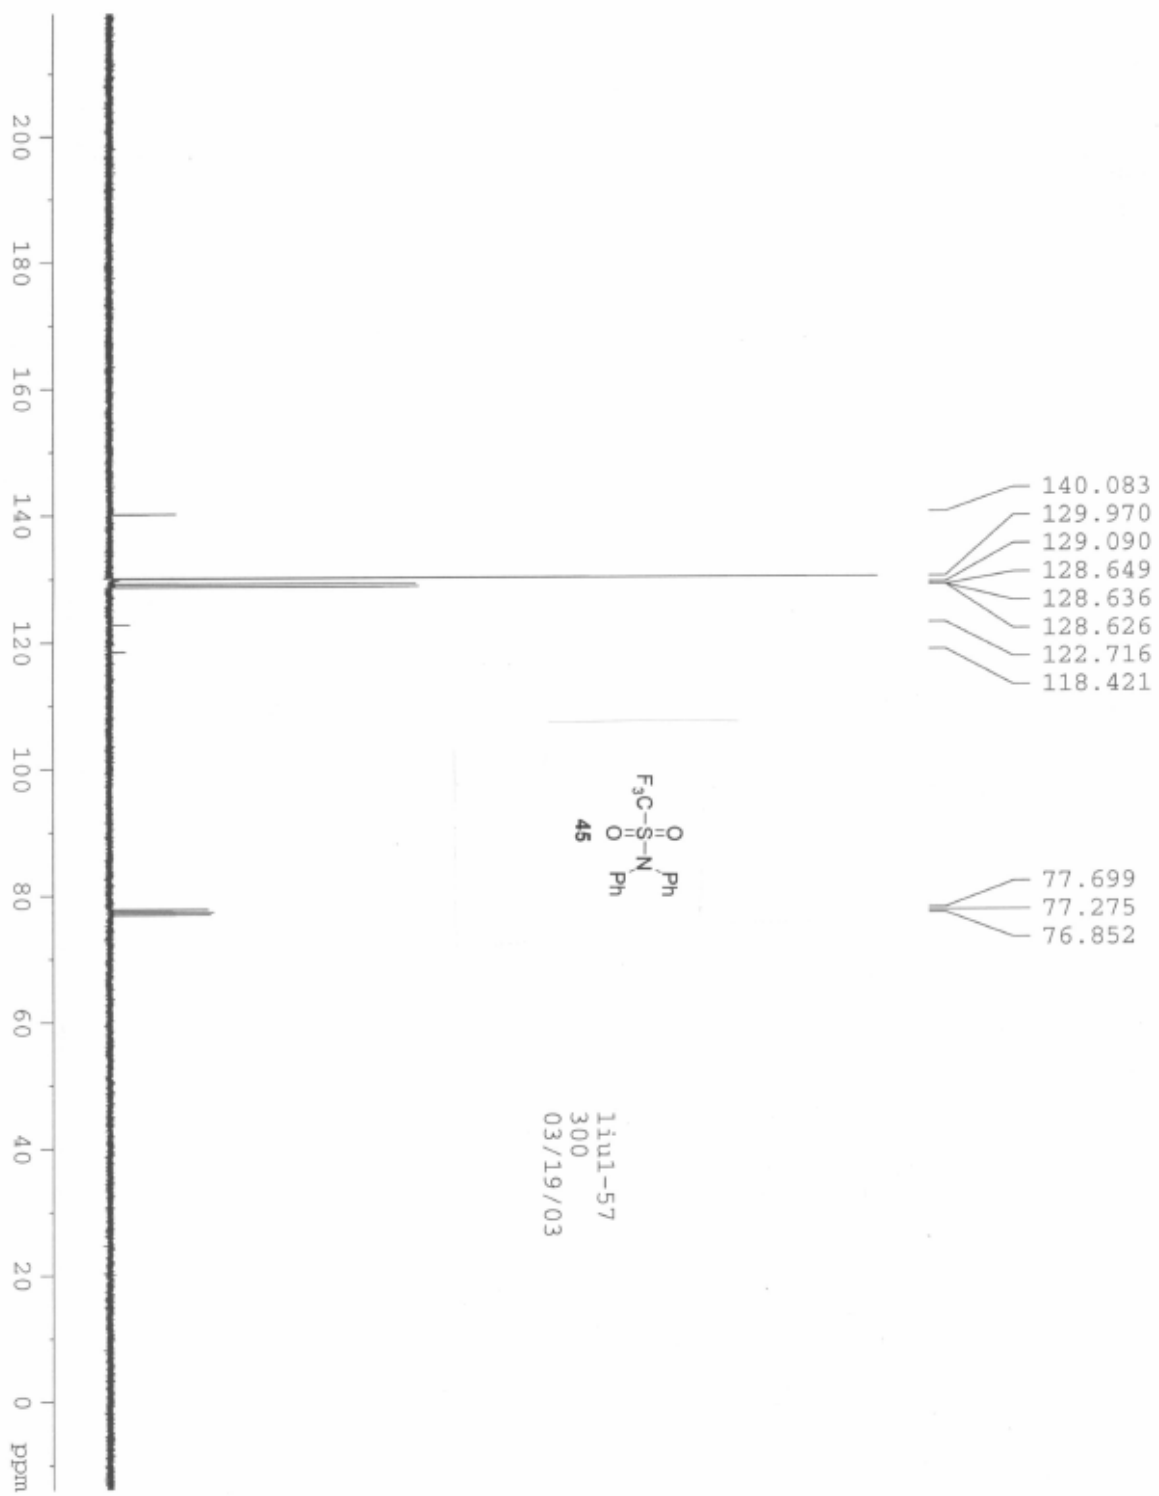

f1iuzhjl-064/300/08/19/03

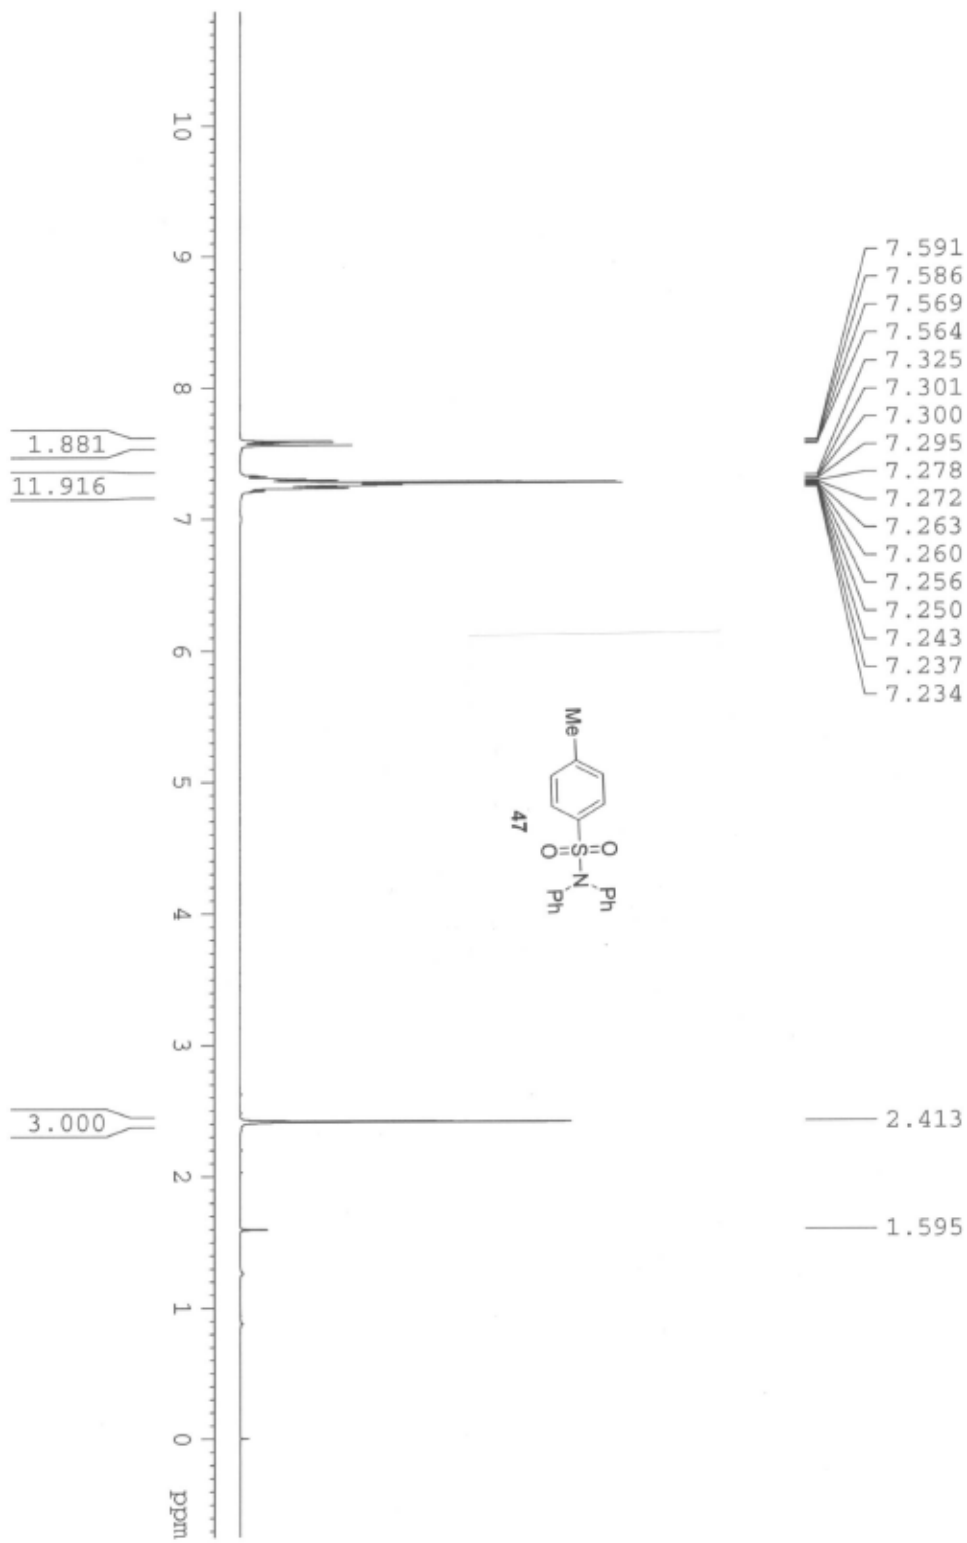

Fluorhjl-065/300/08/19/03

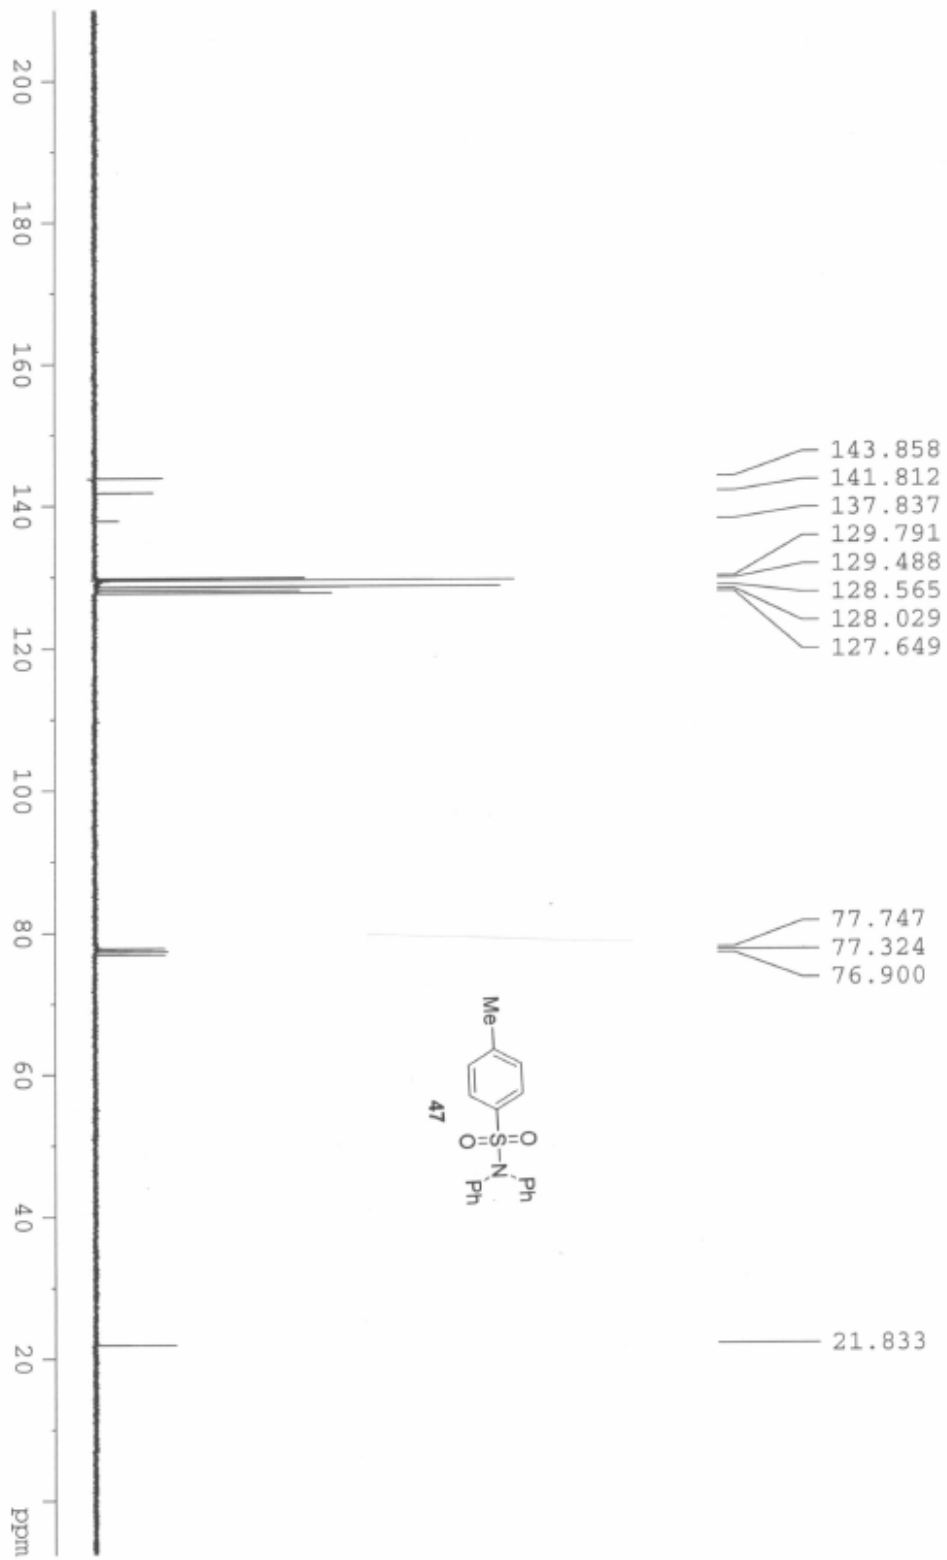

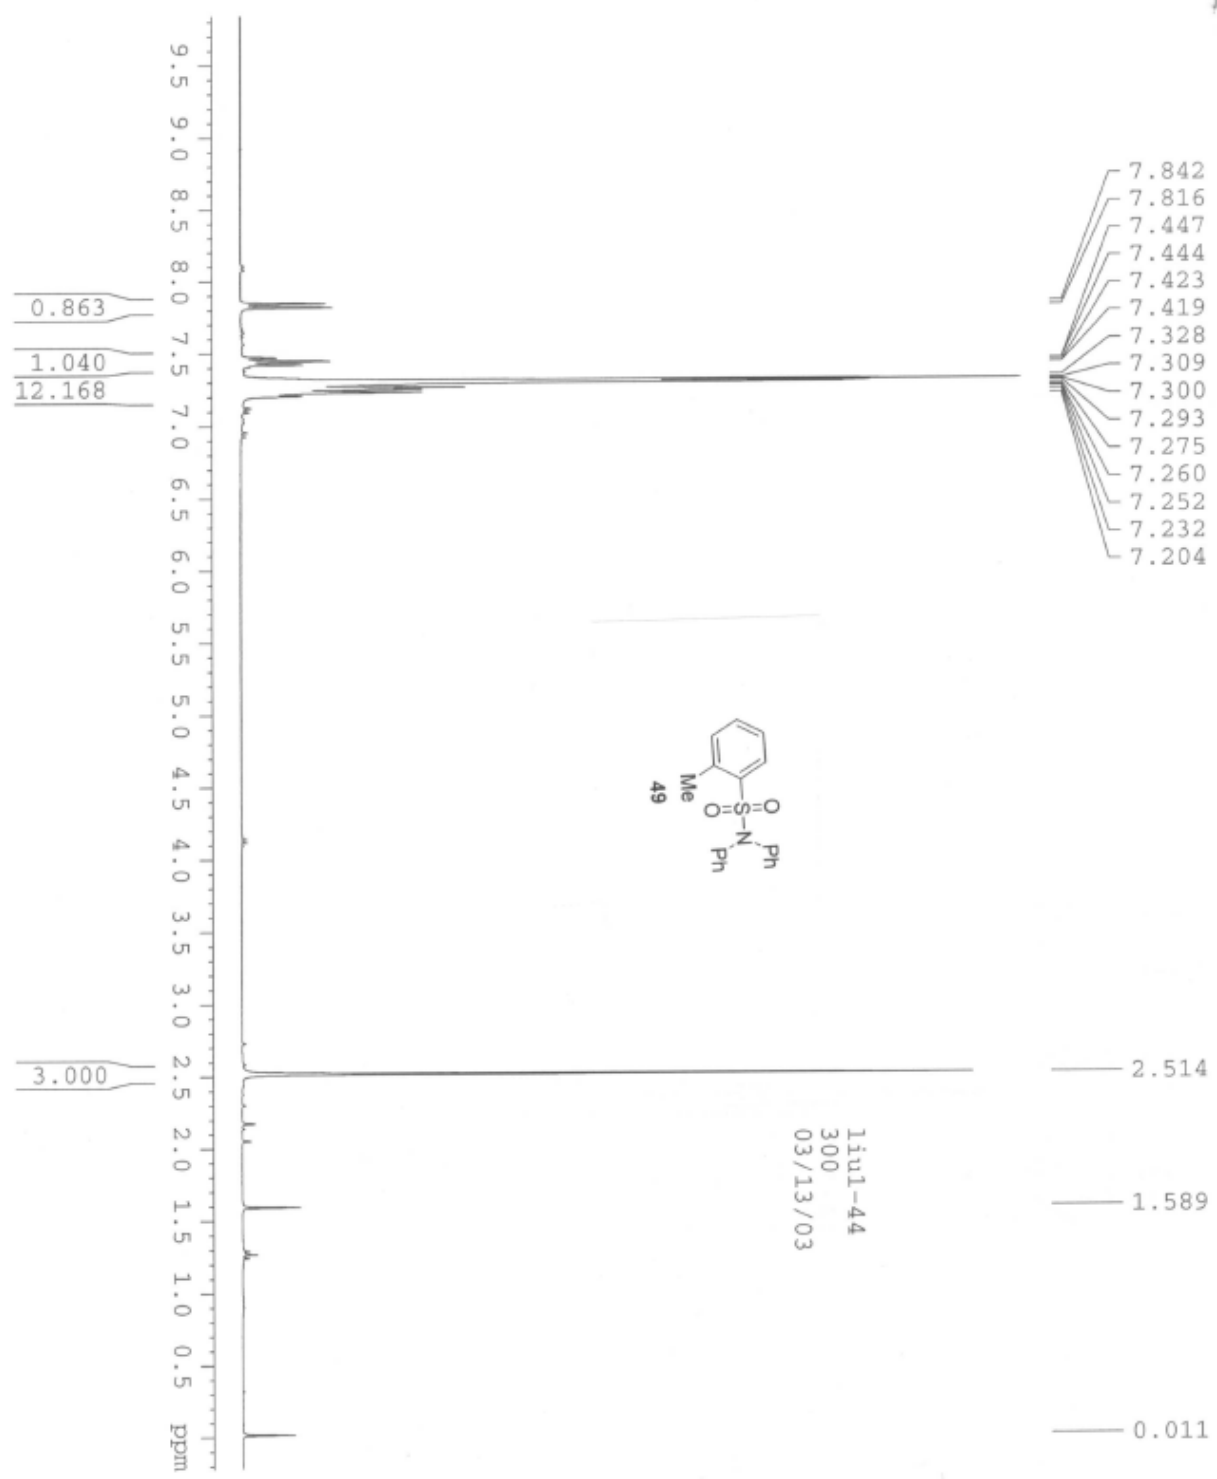



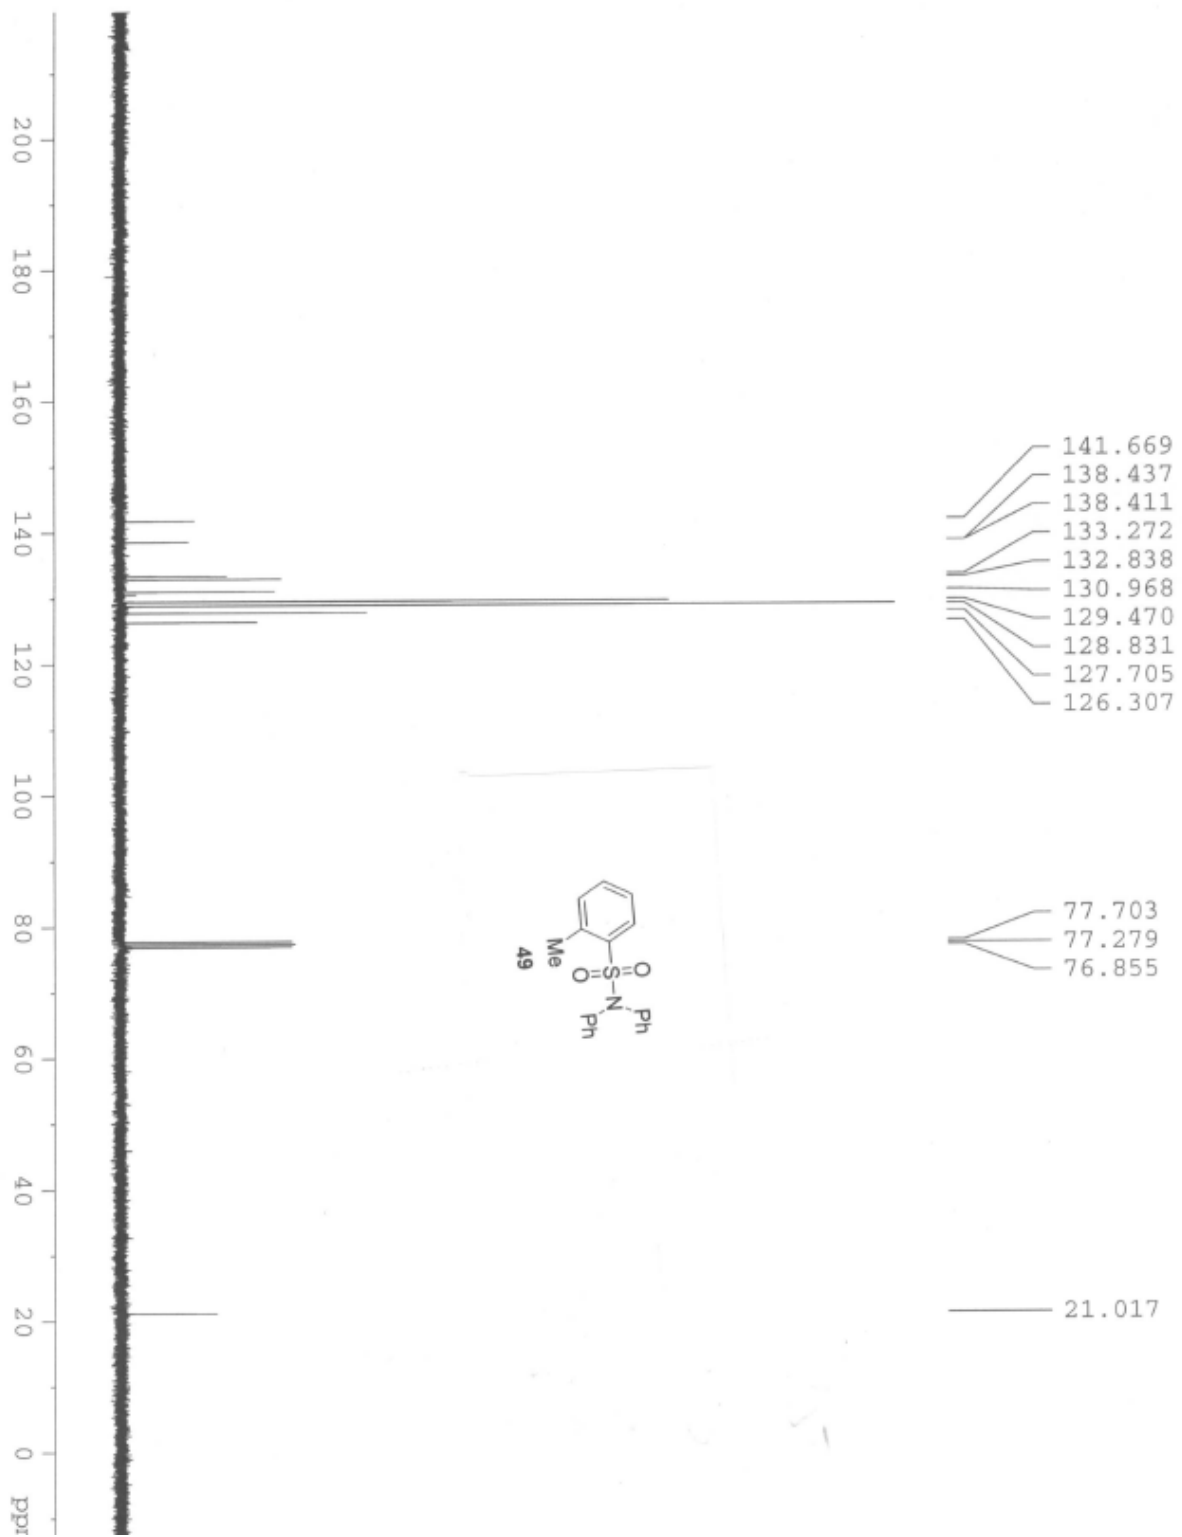

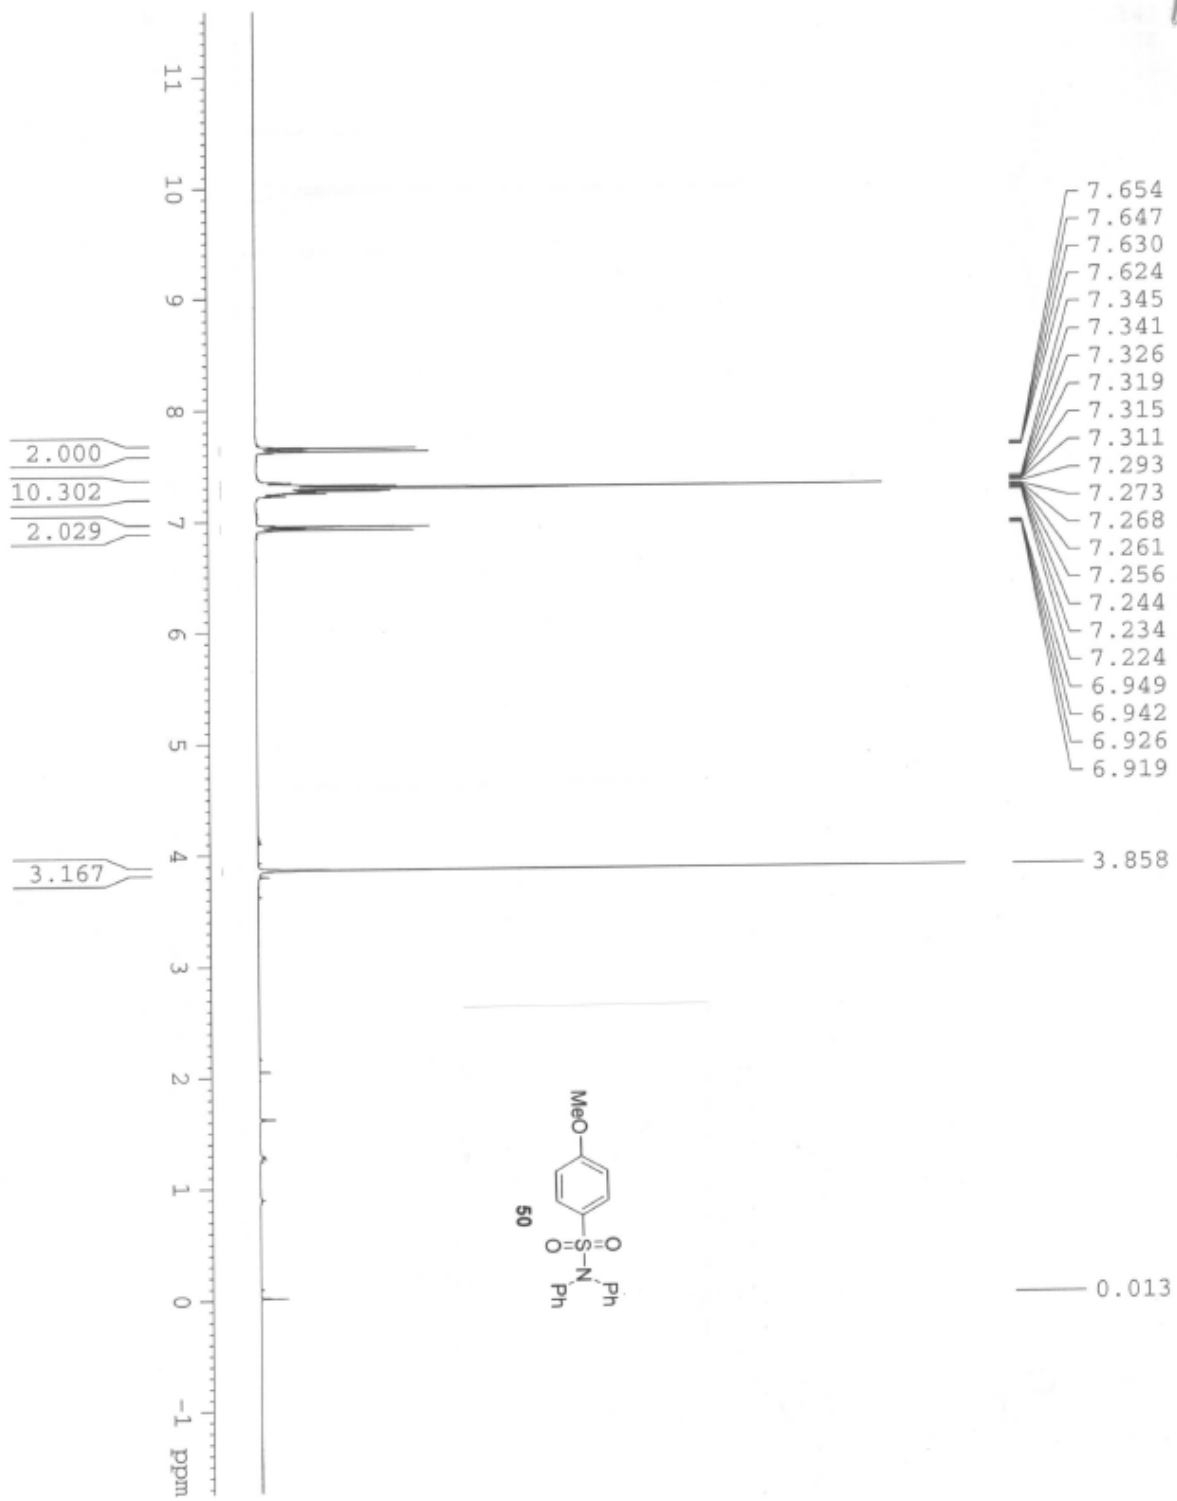

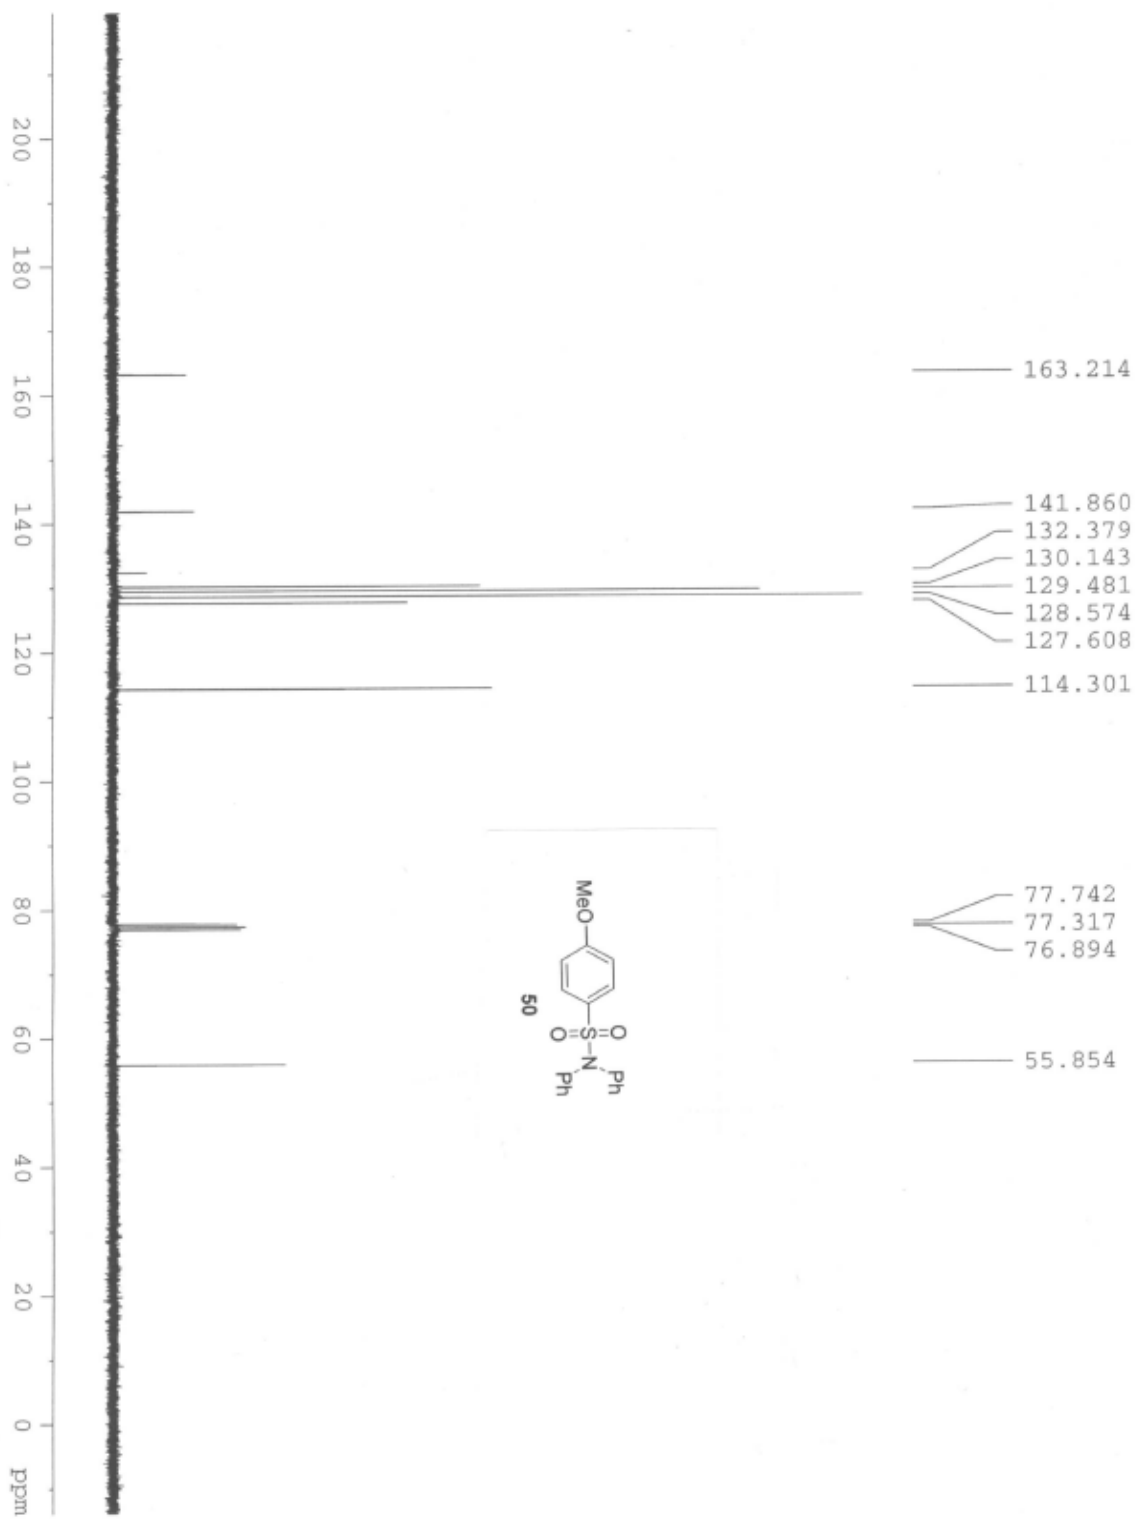

all1109/300/12/12/05

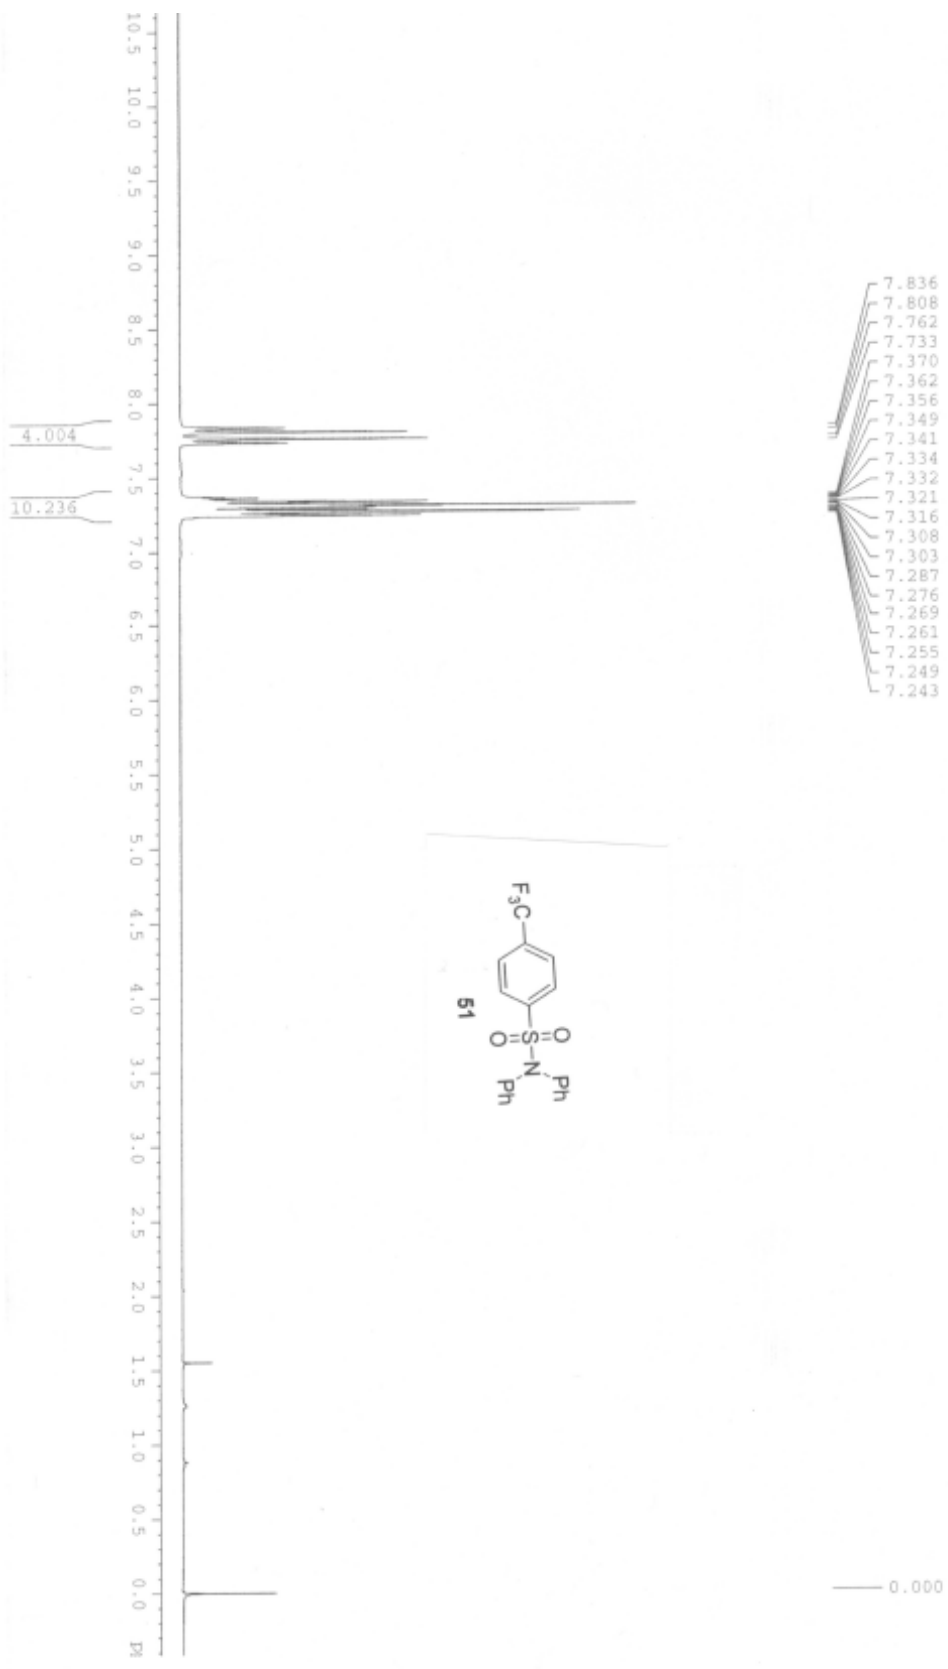

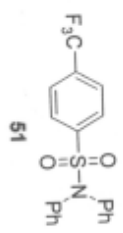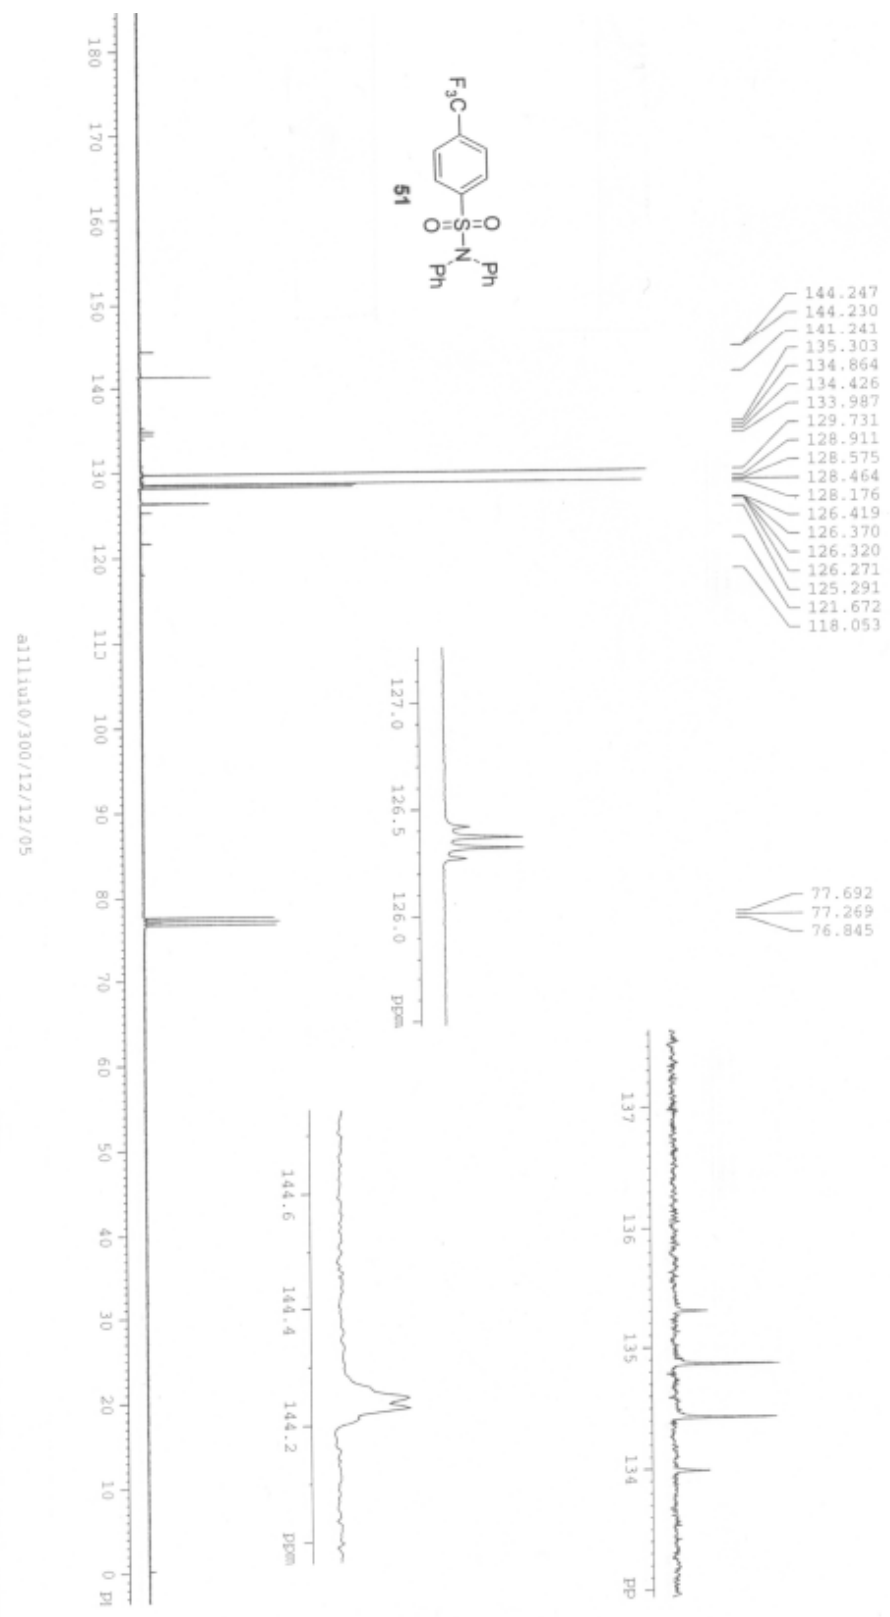

01110188/300/12/07/05

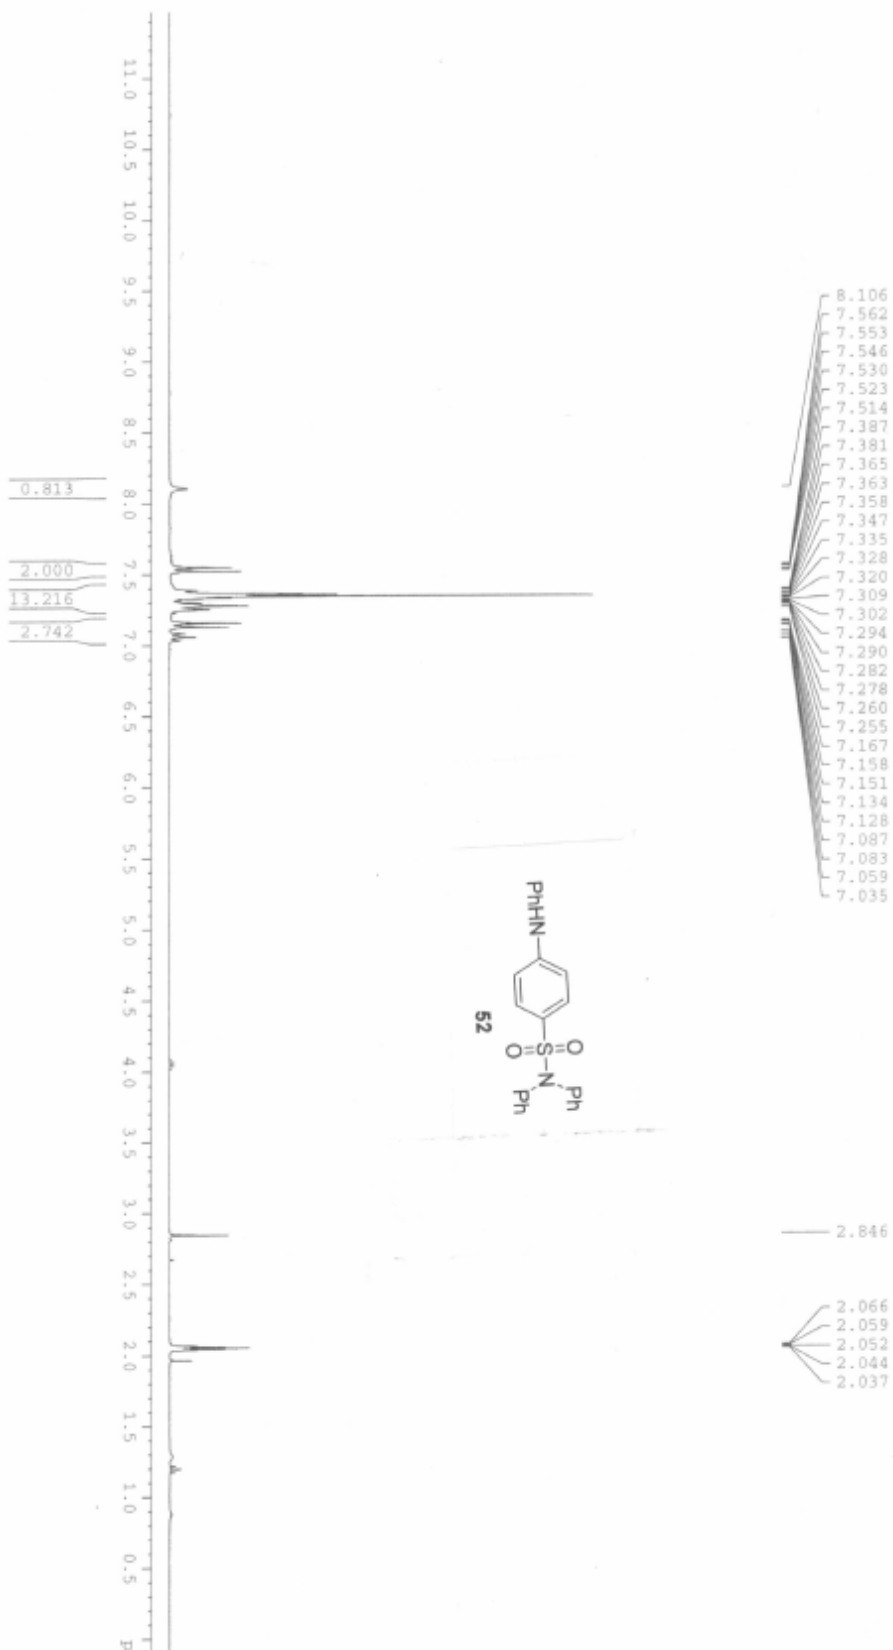

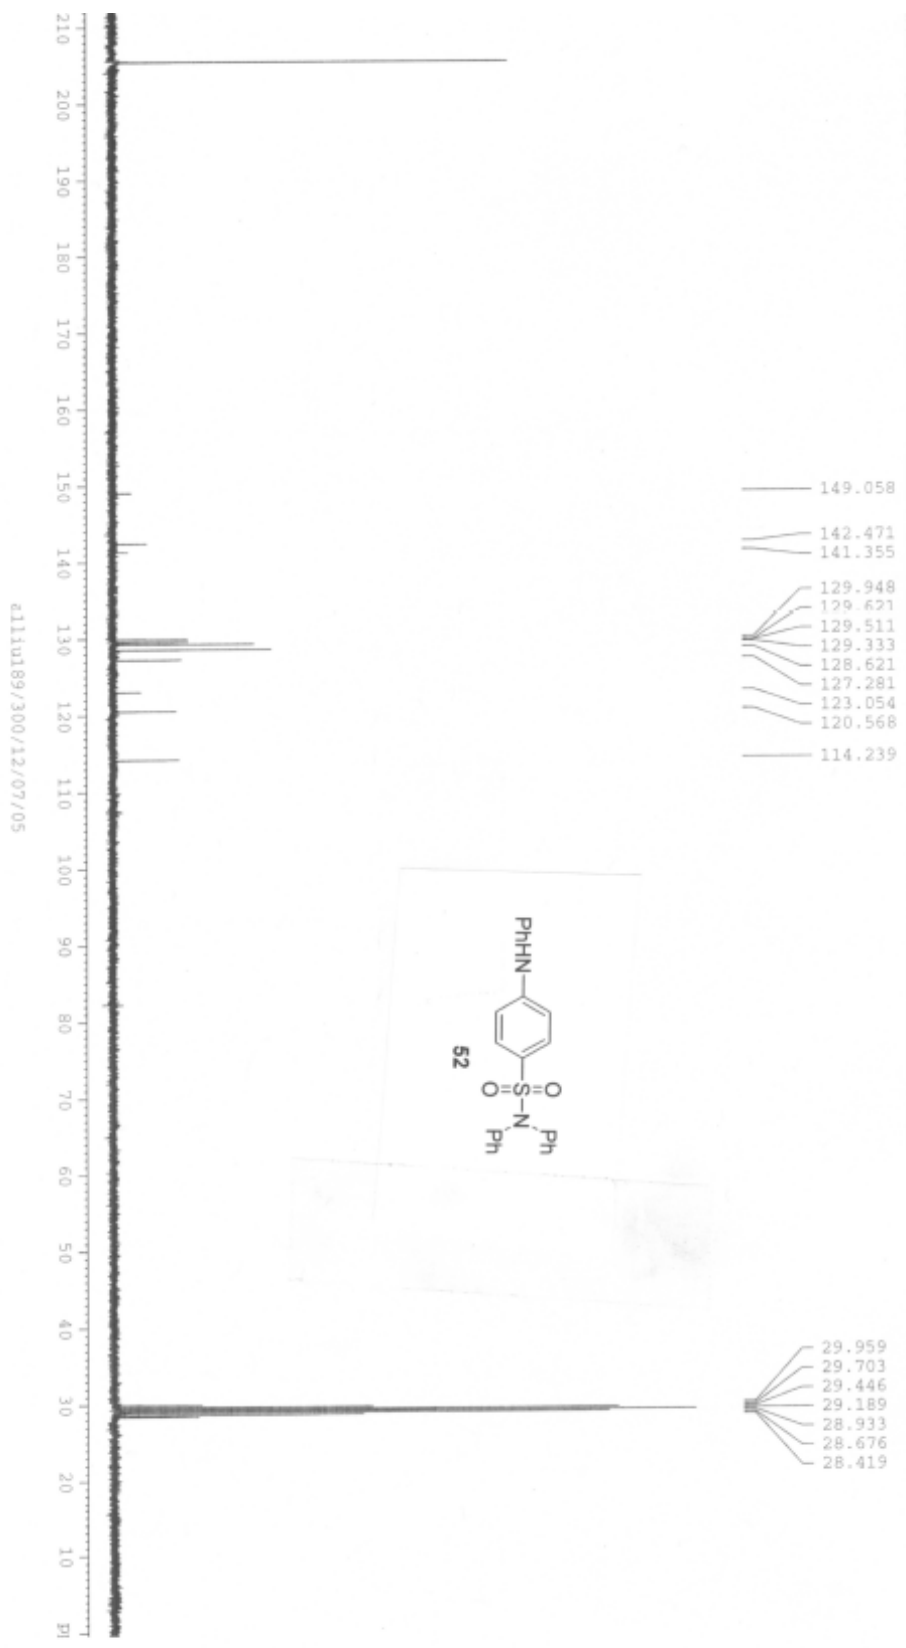

0111105/300/17/10/05

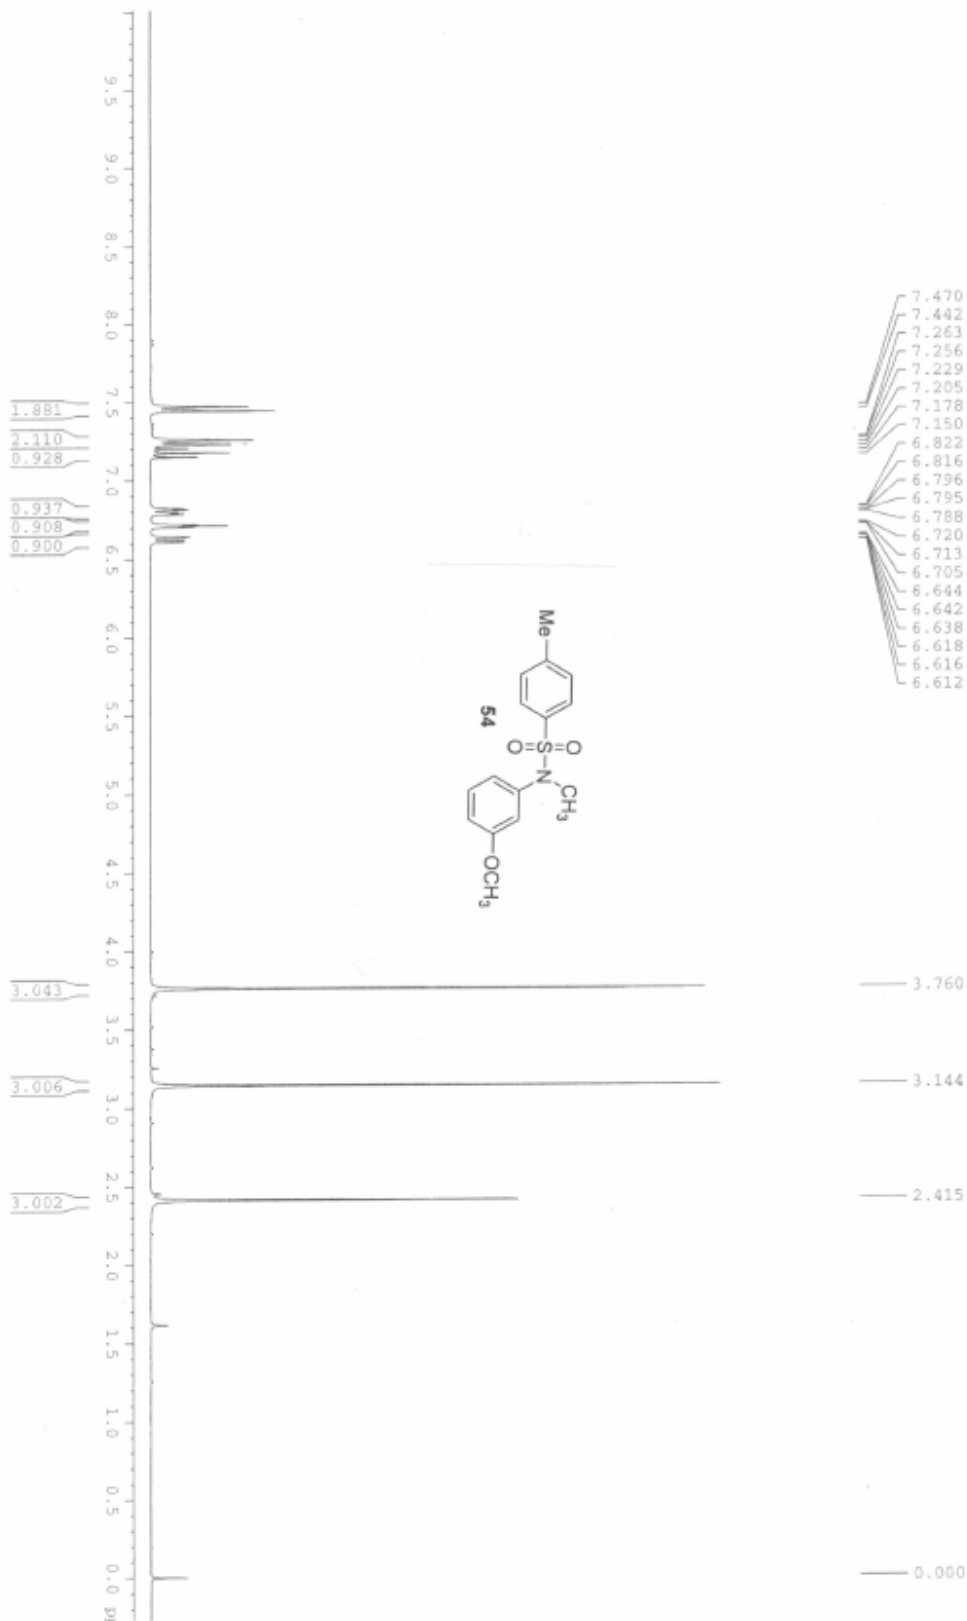



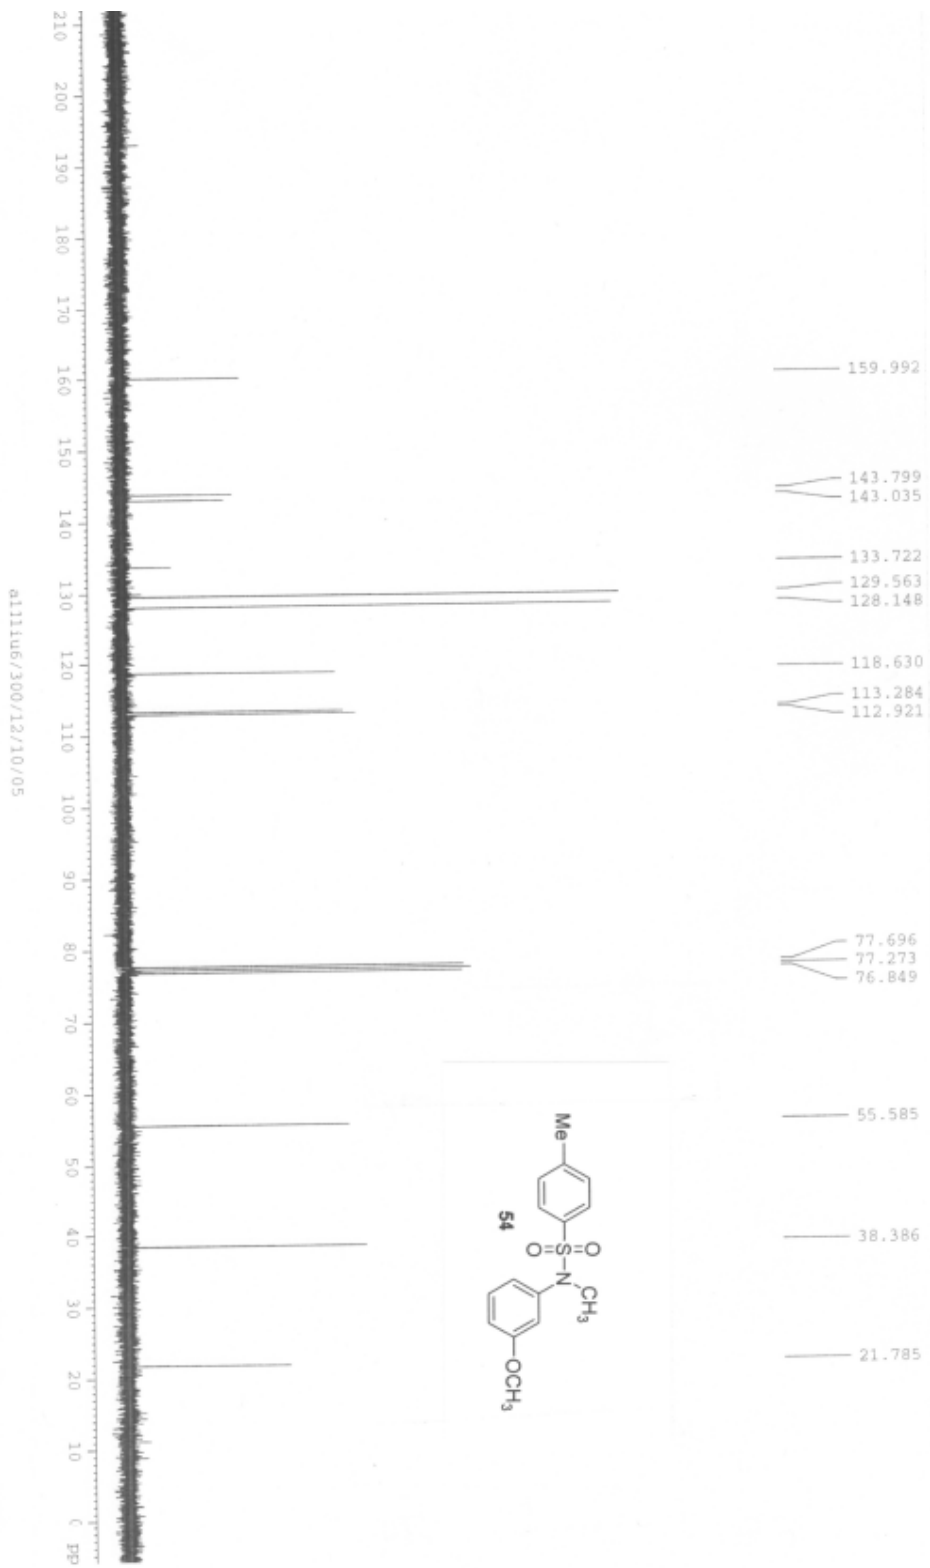

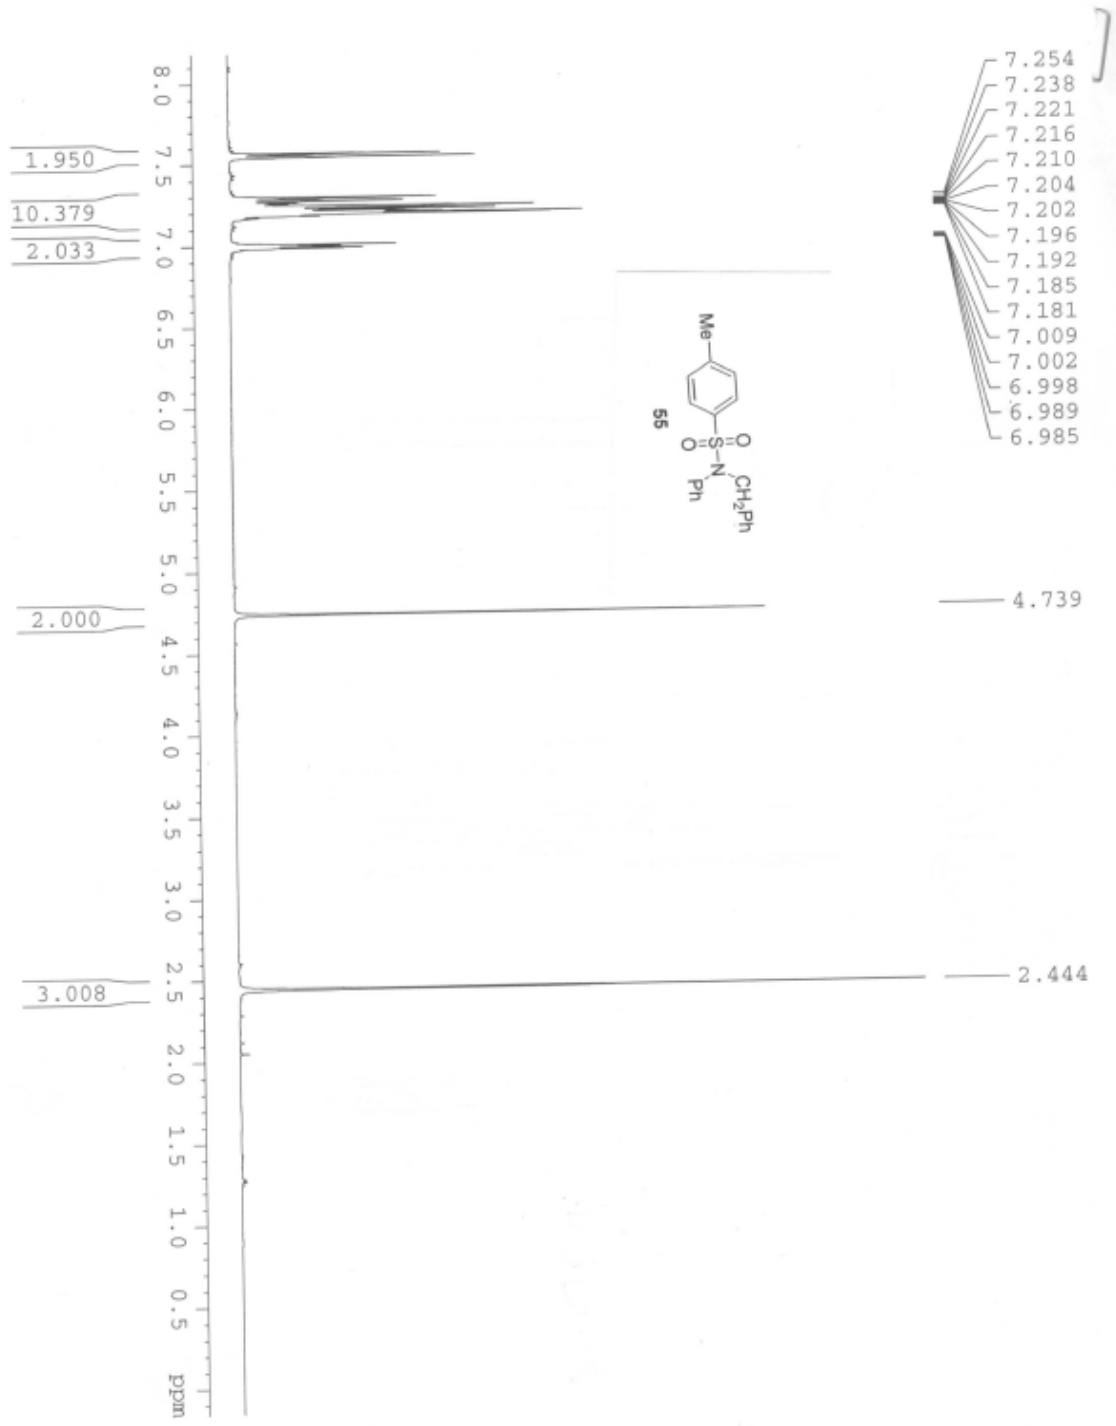

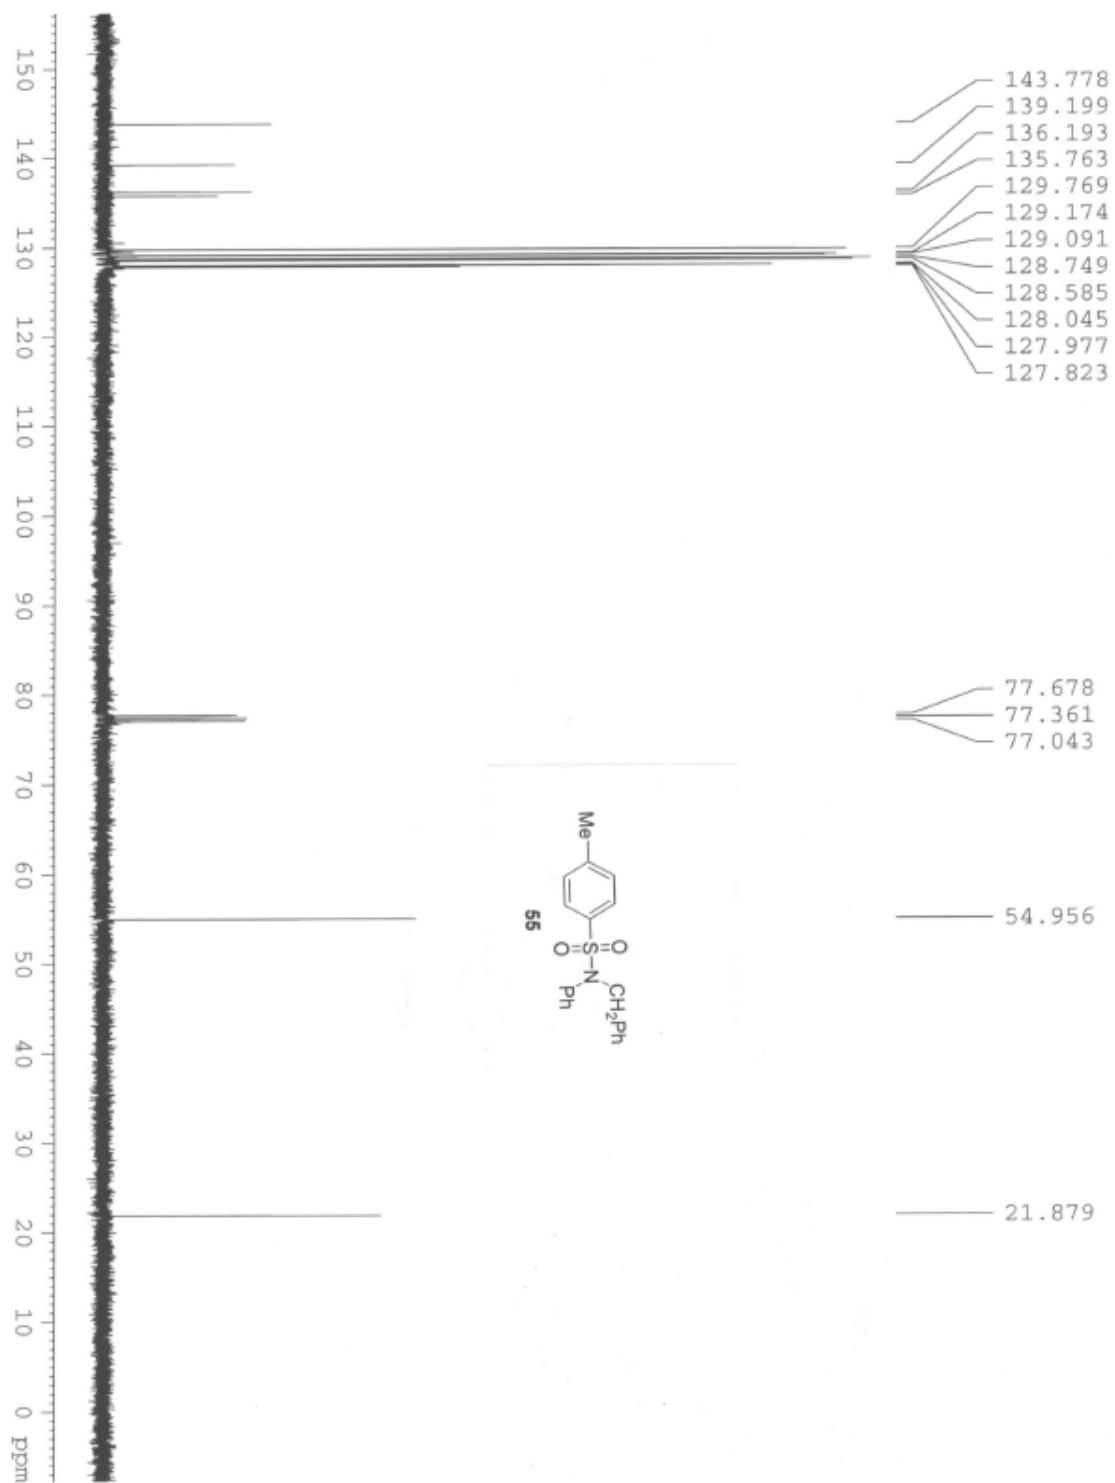

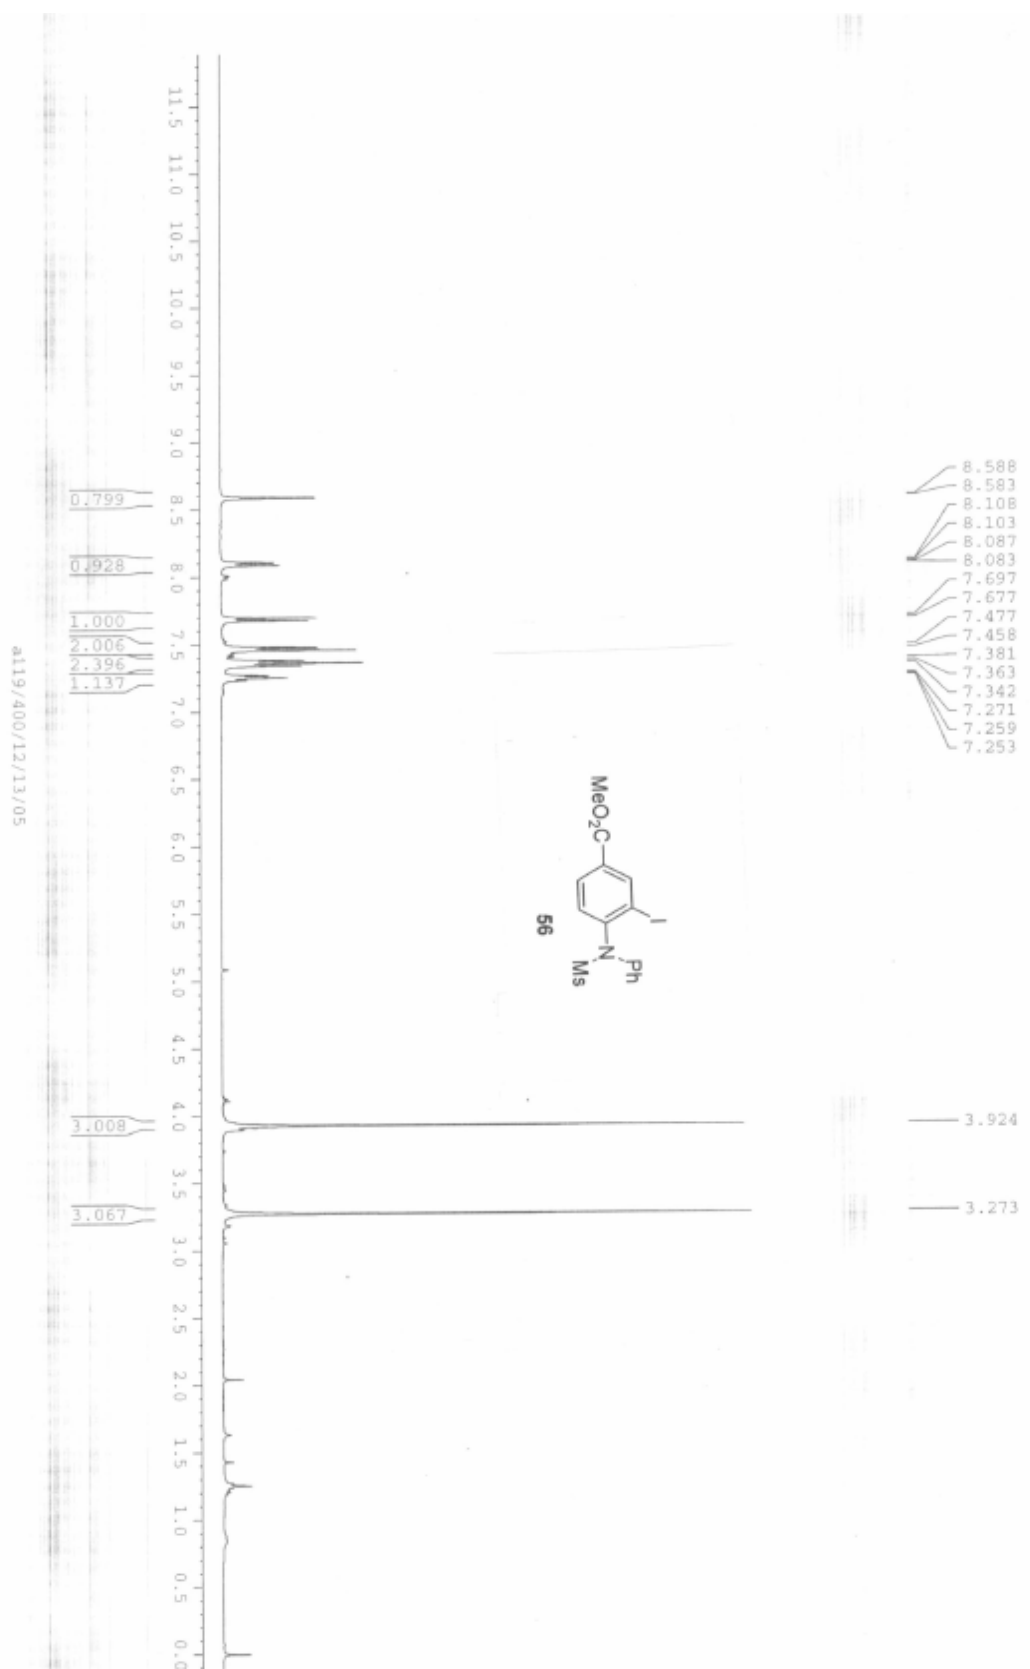

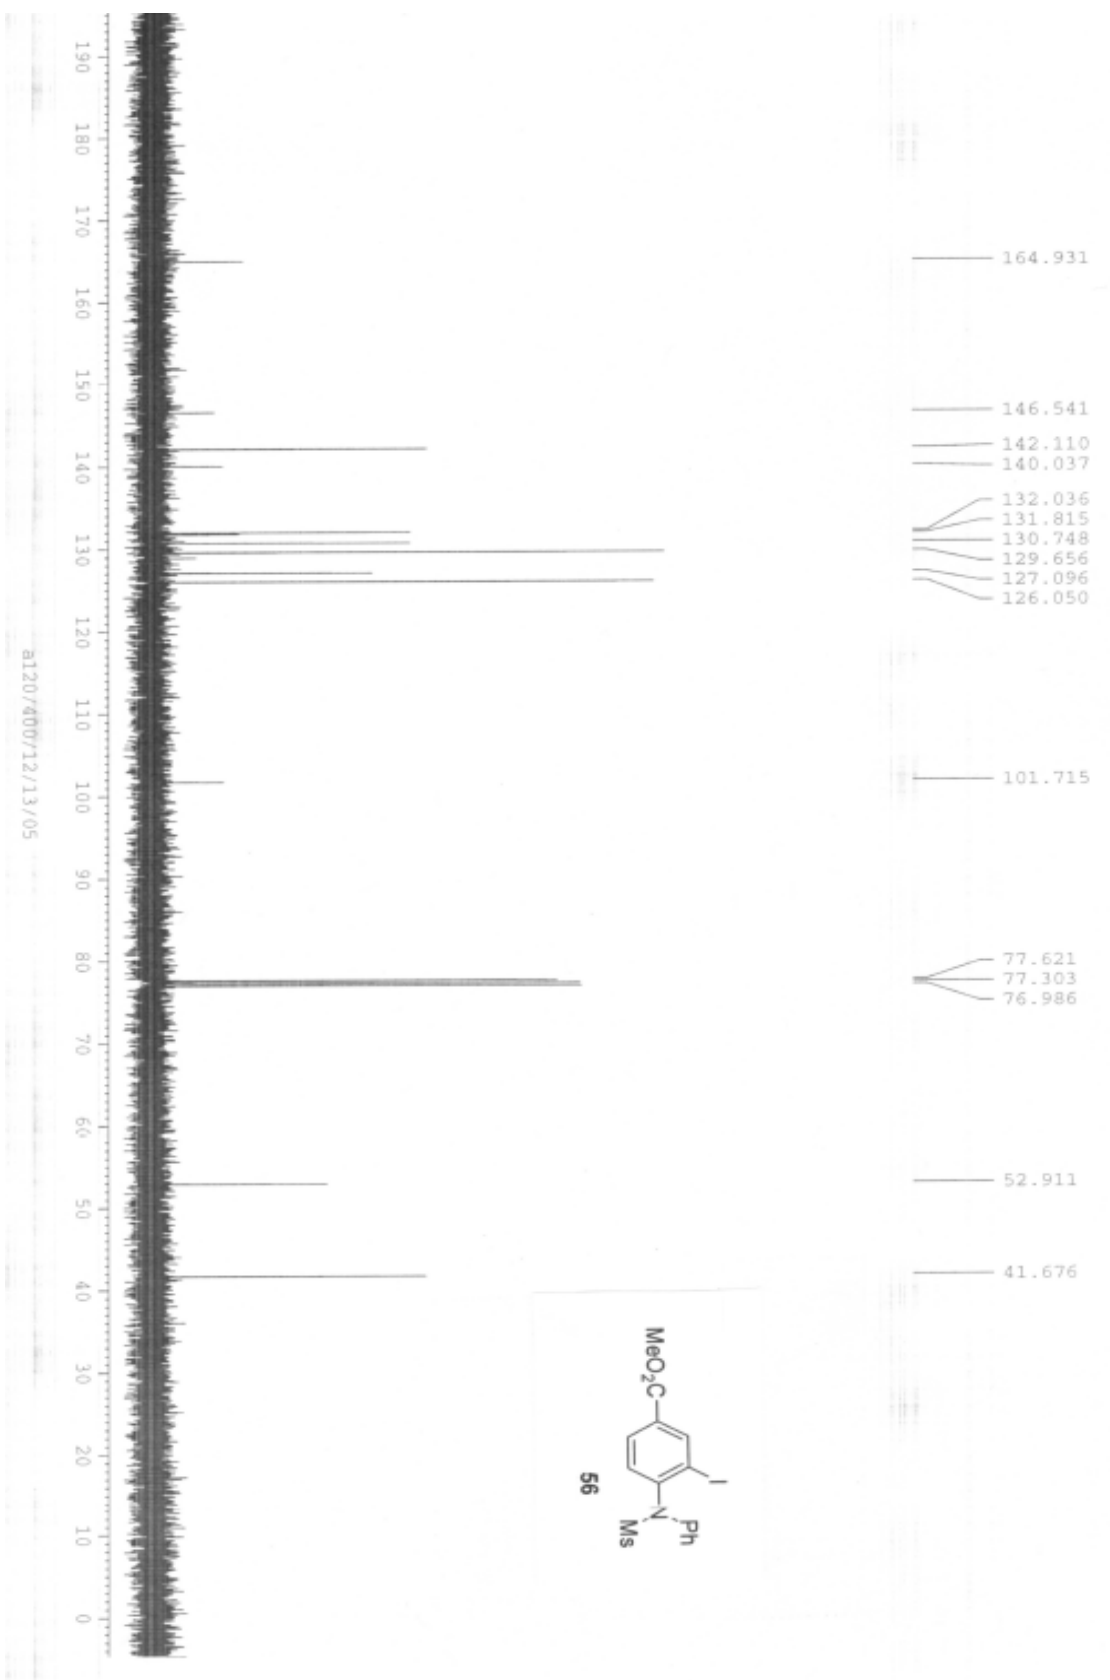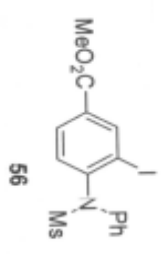

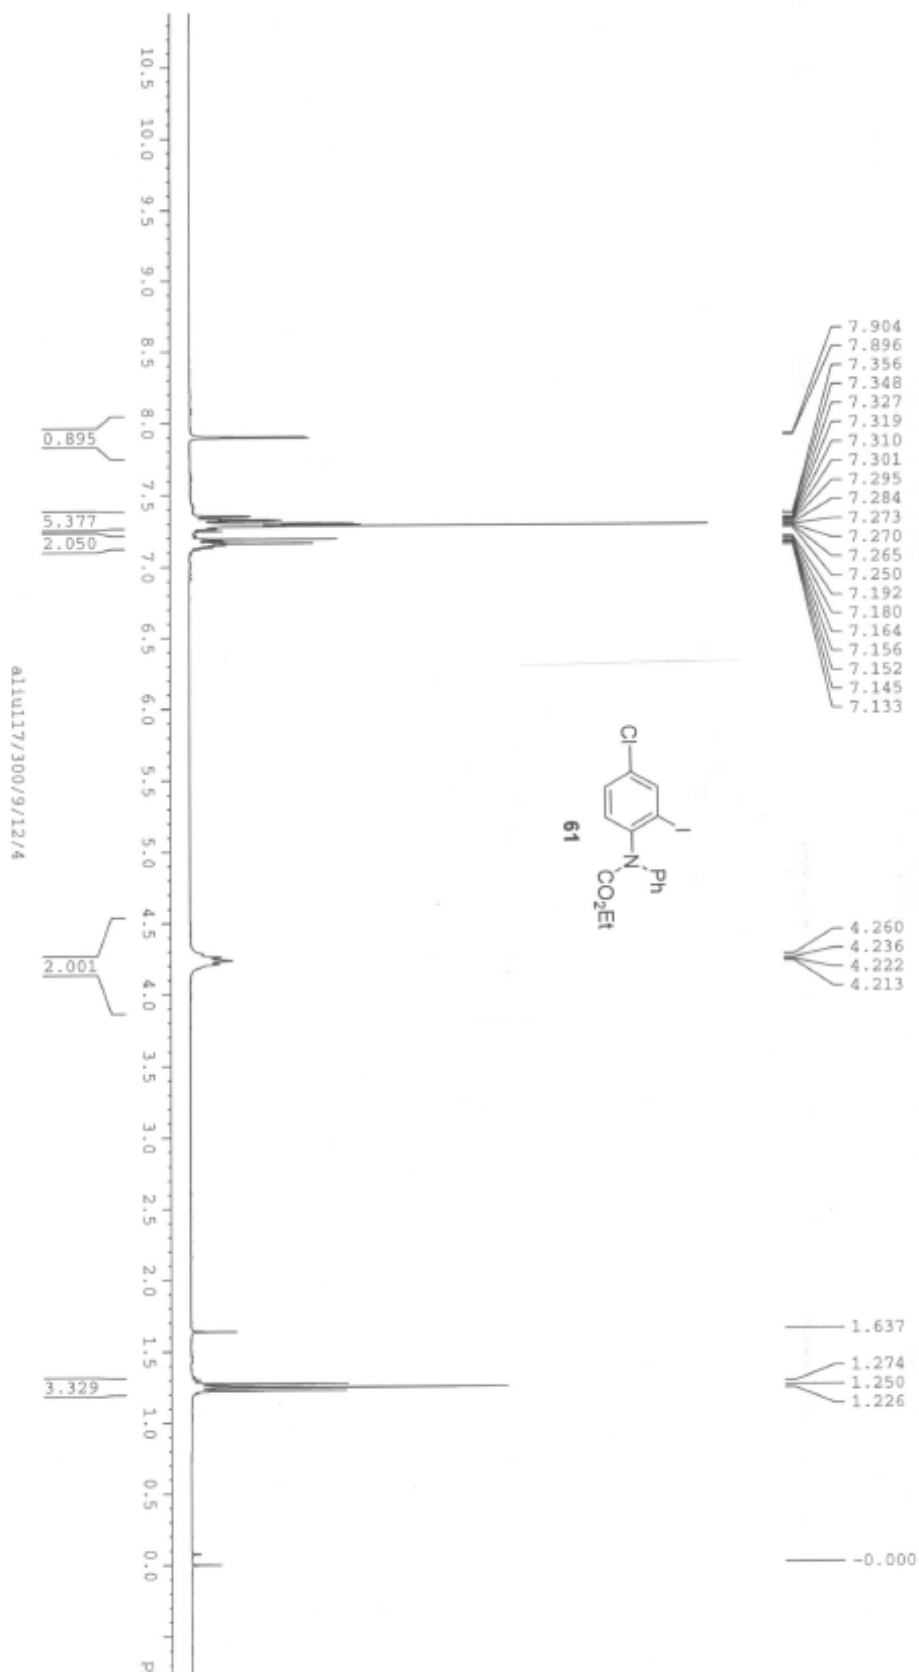

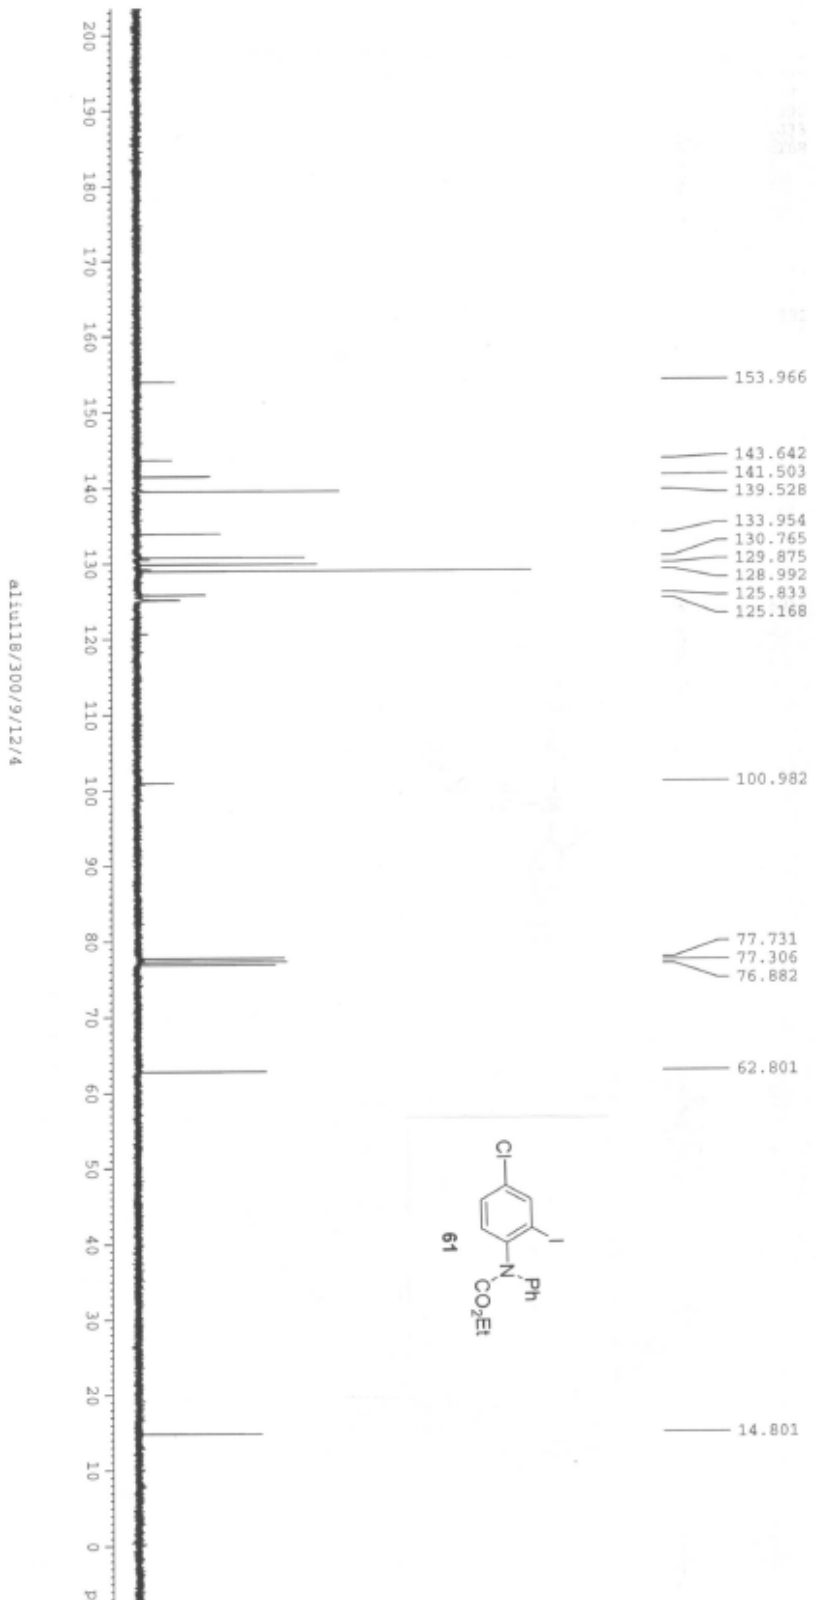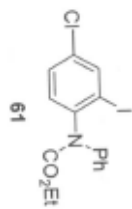

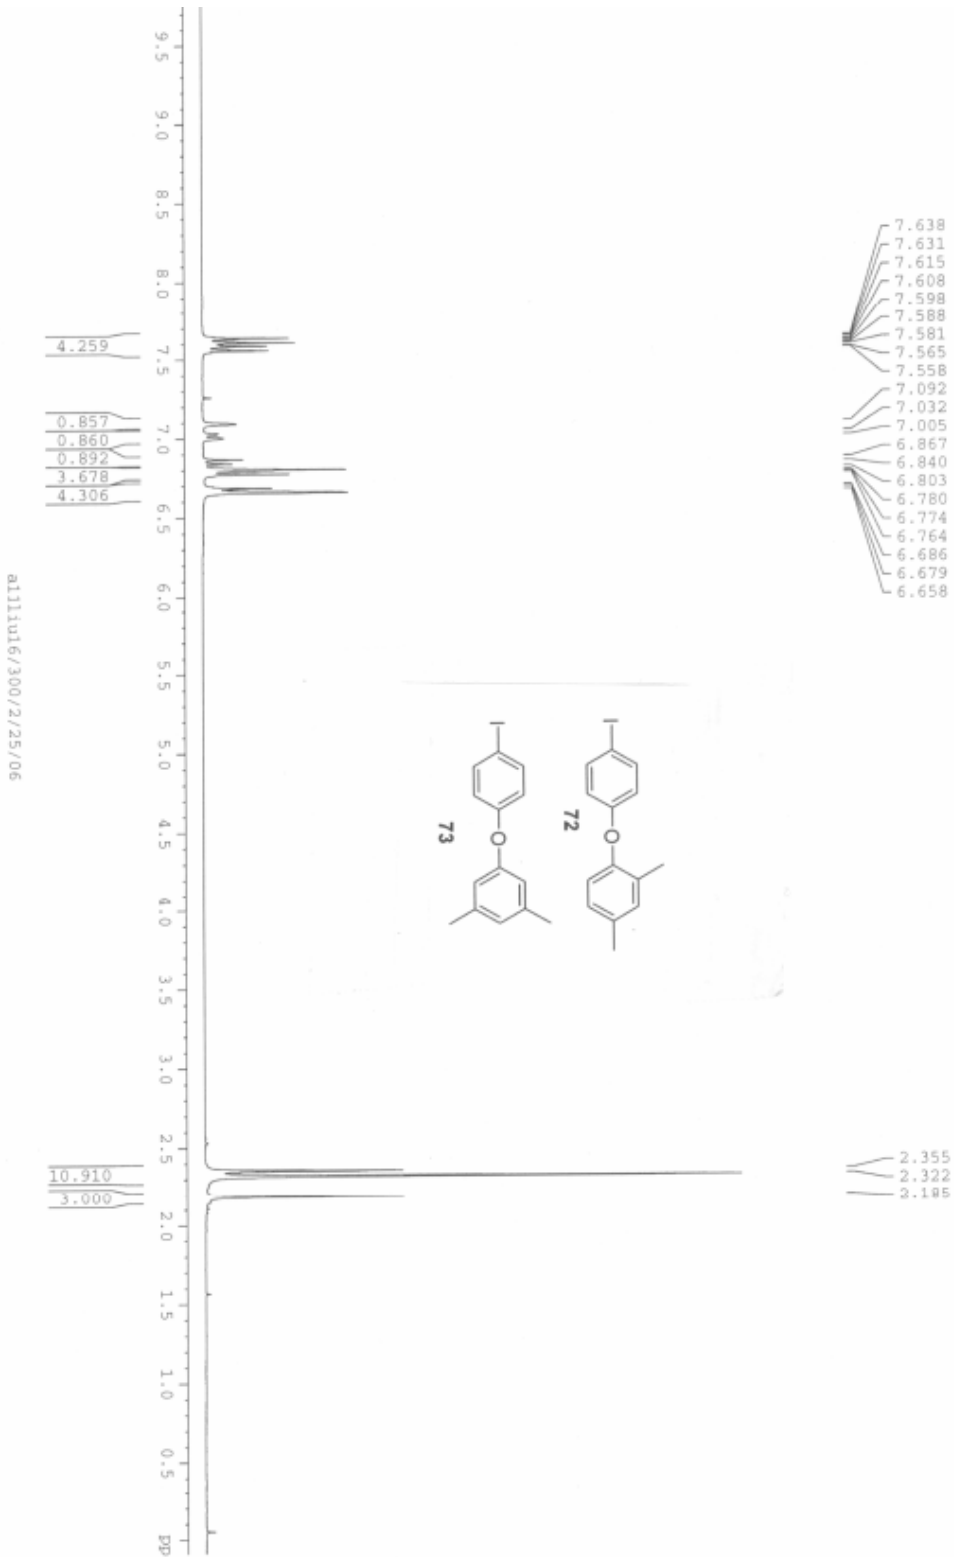



01111117/300/2/25/06

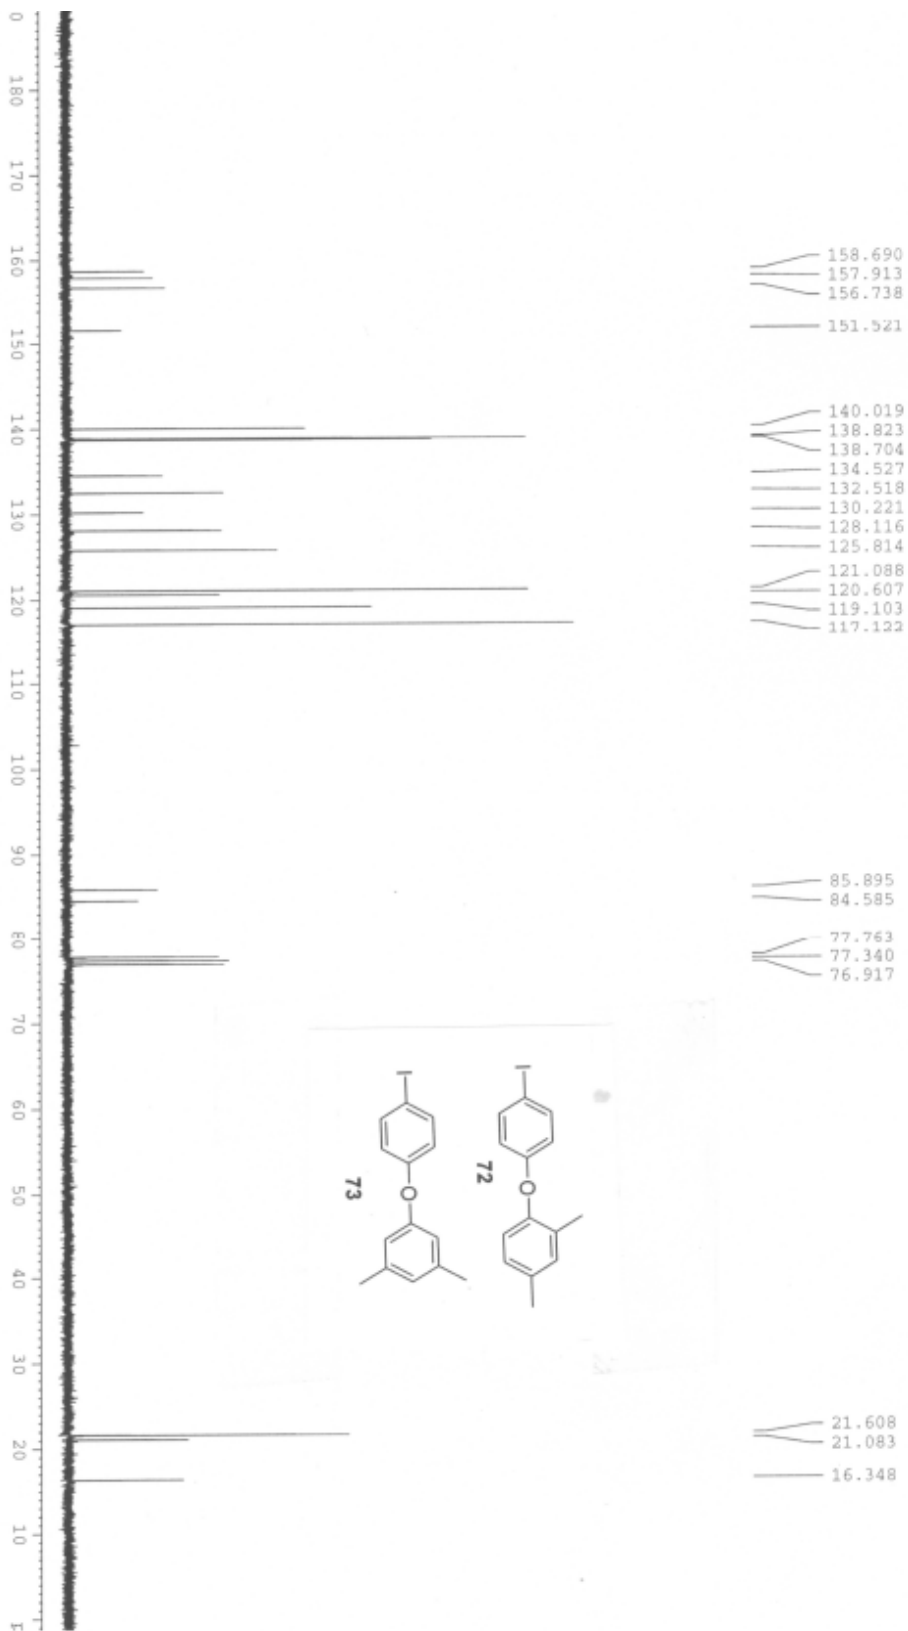

0111018/300/12/18/05

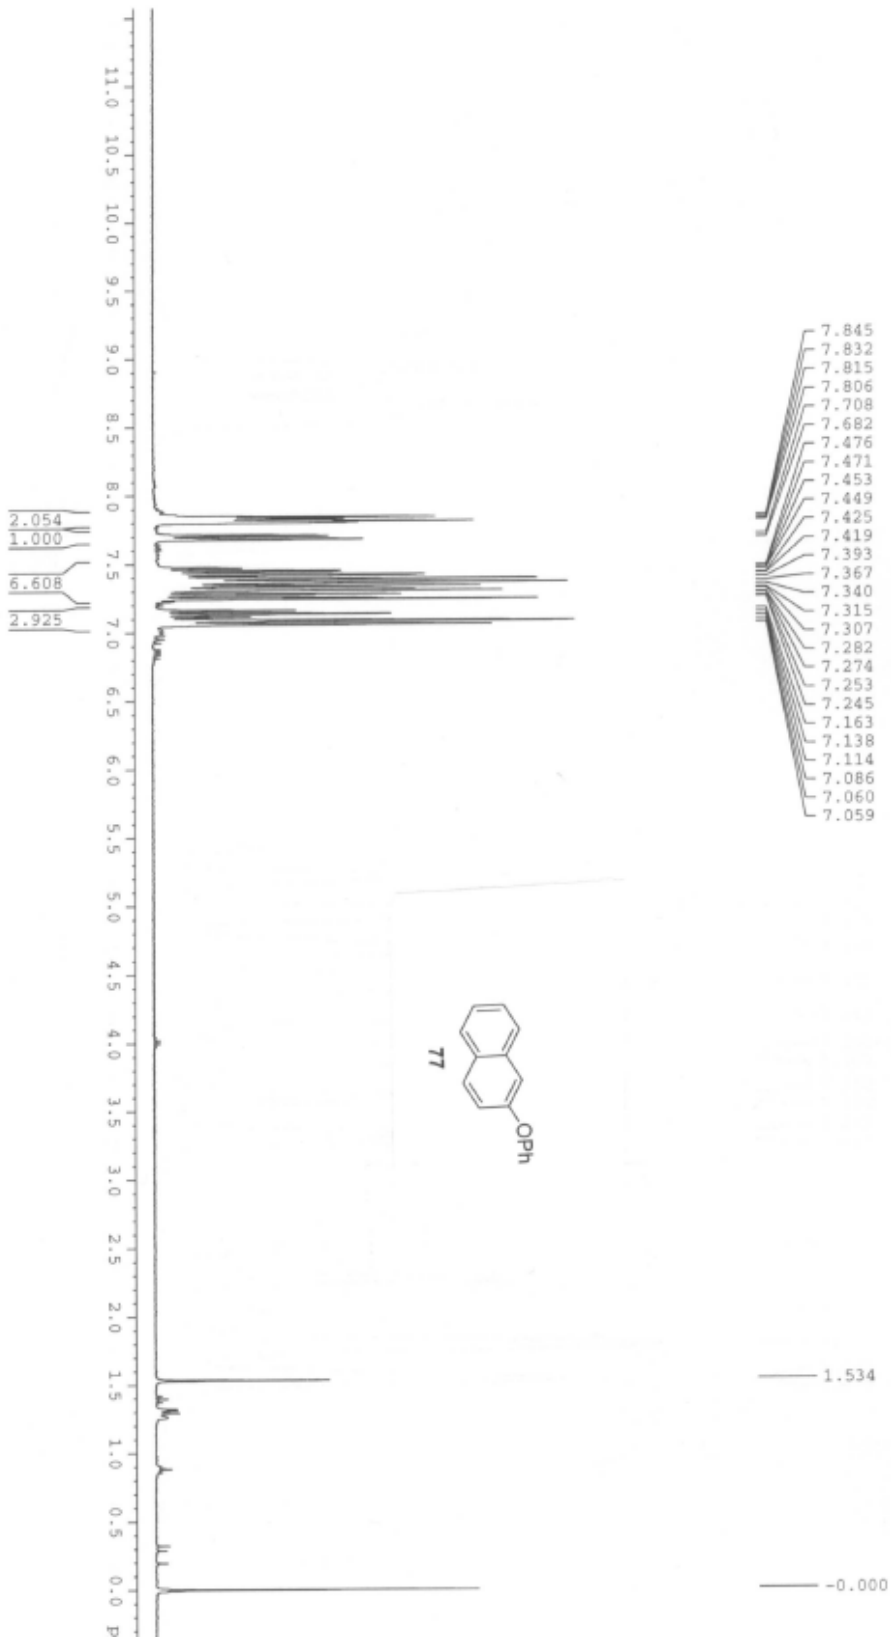

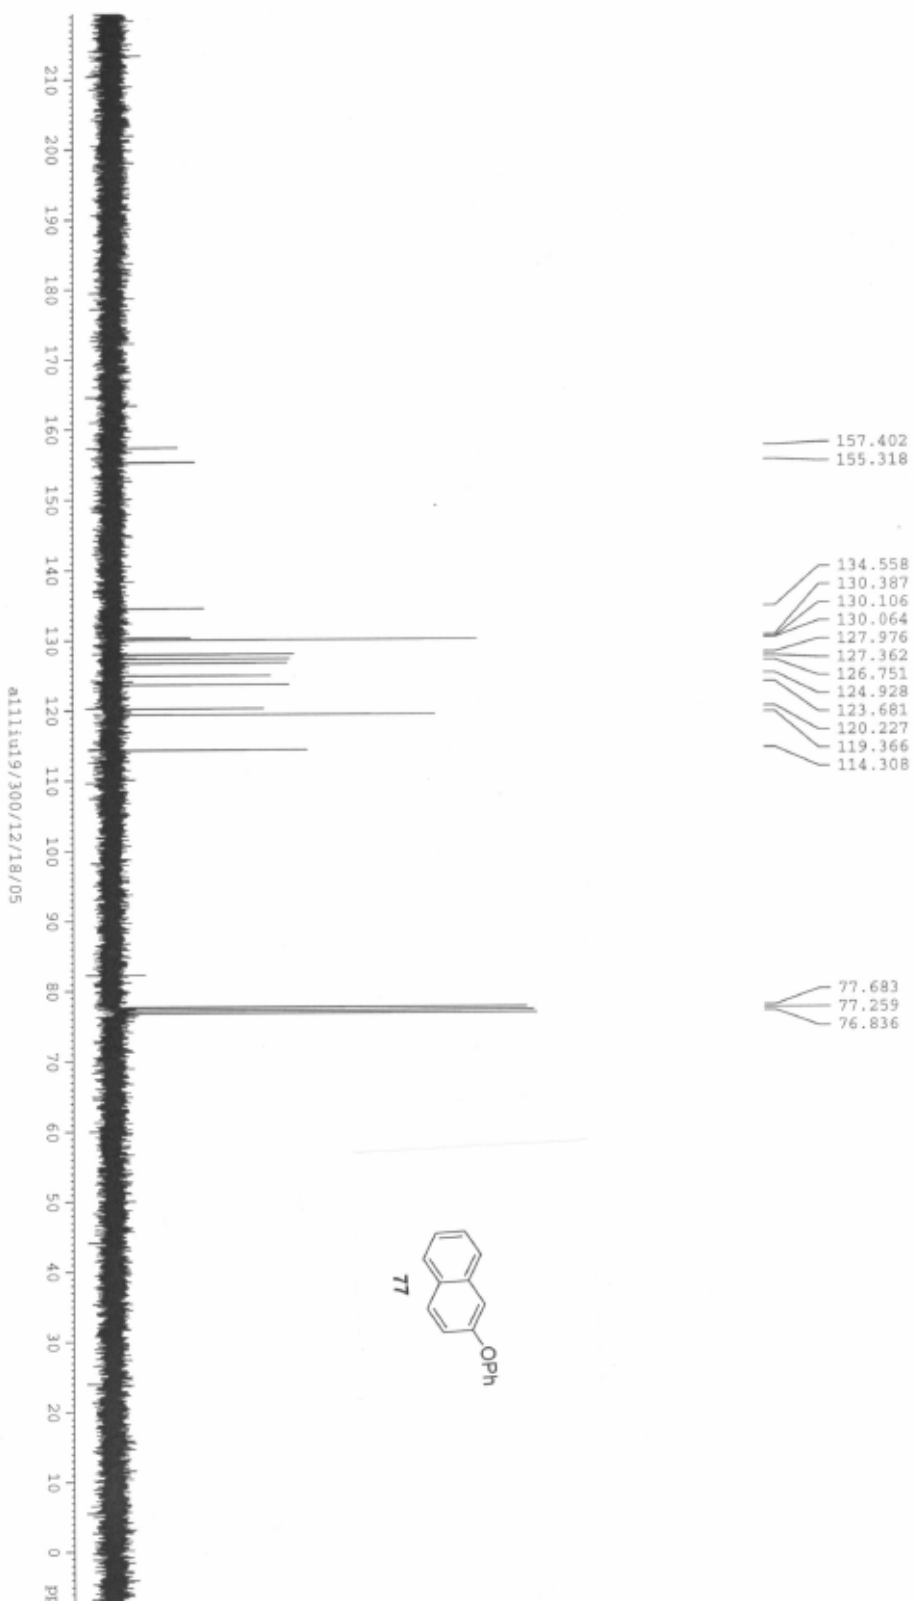

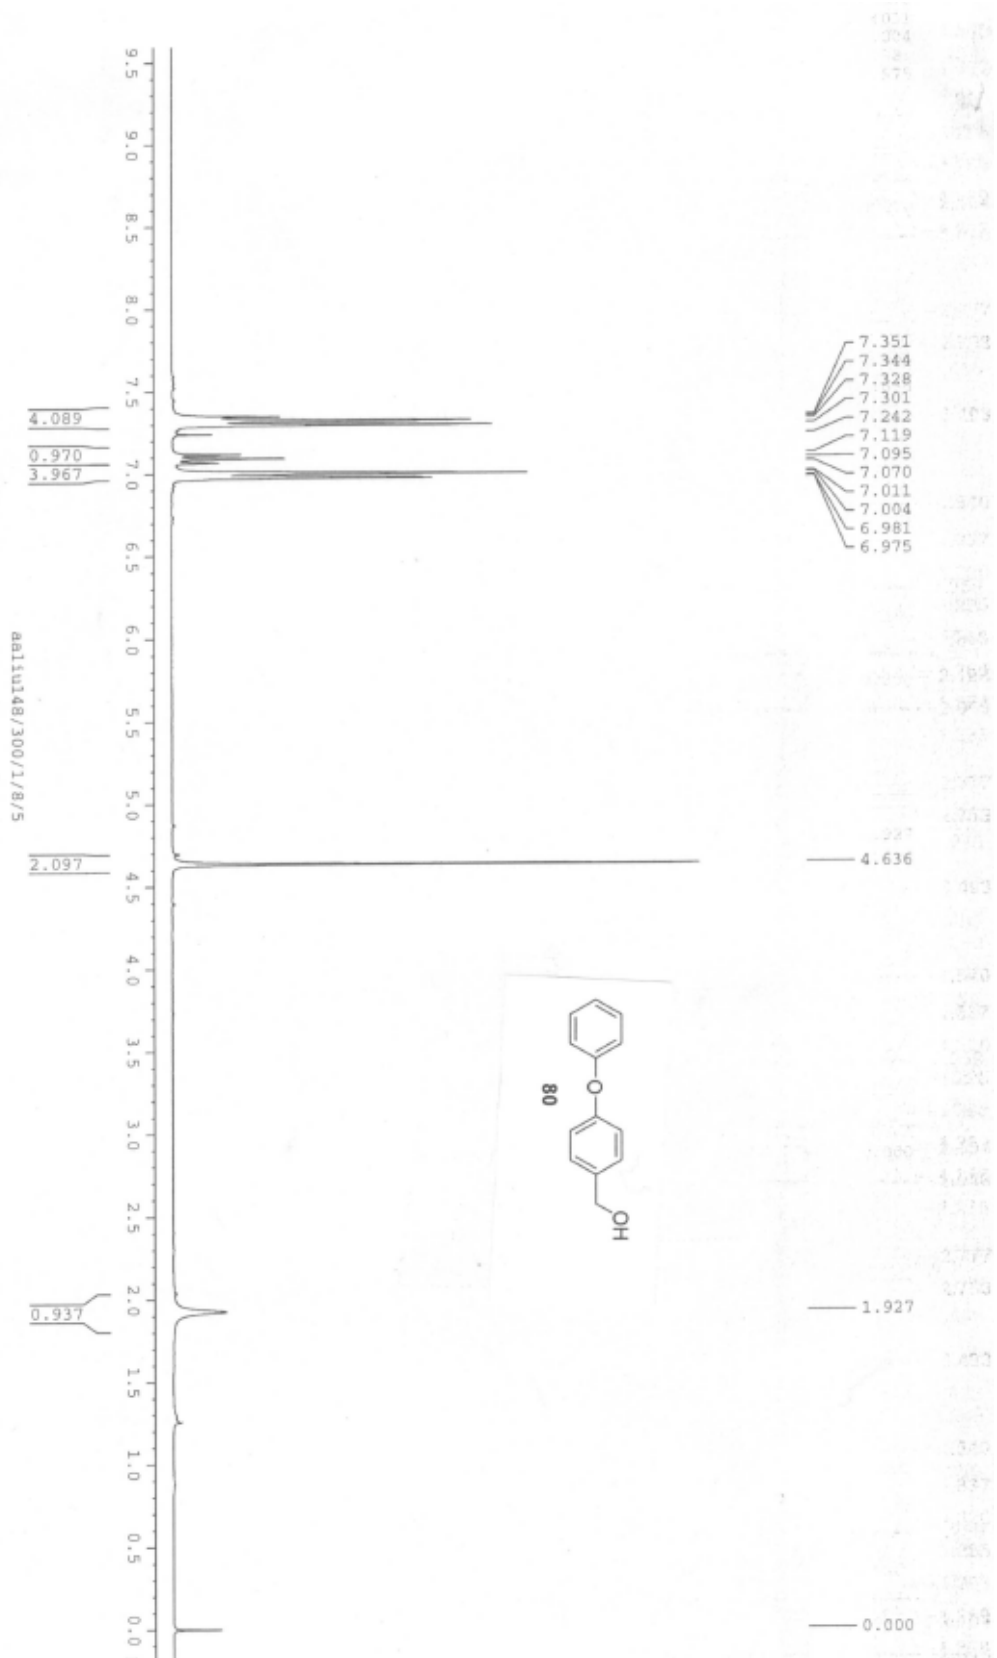

02111149/300/1/8/5

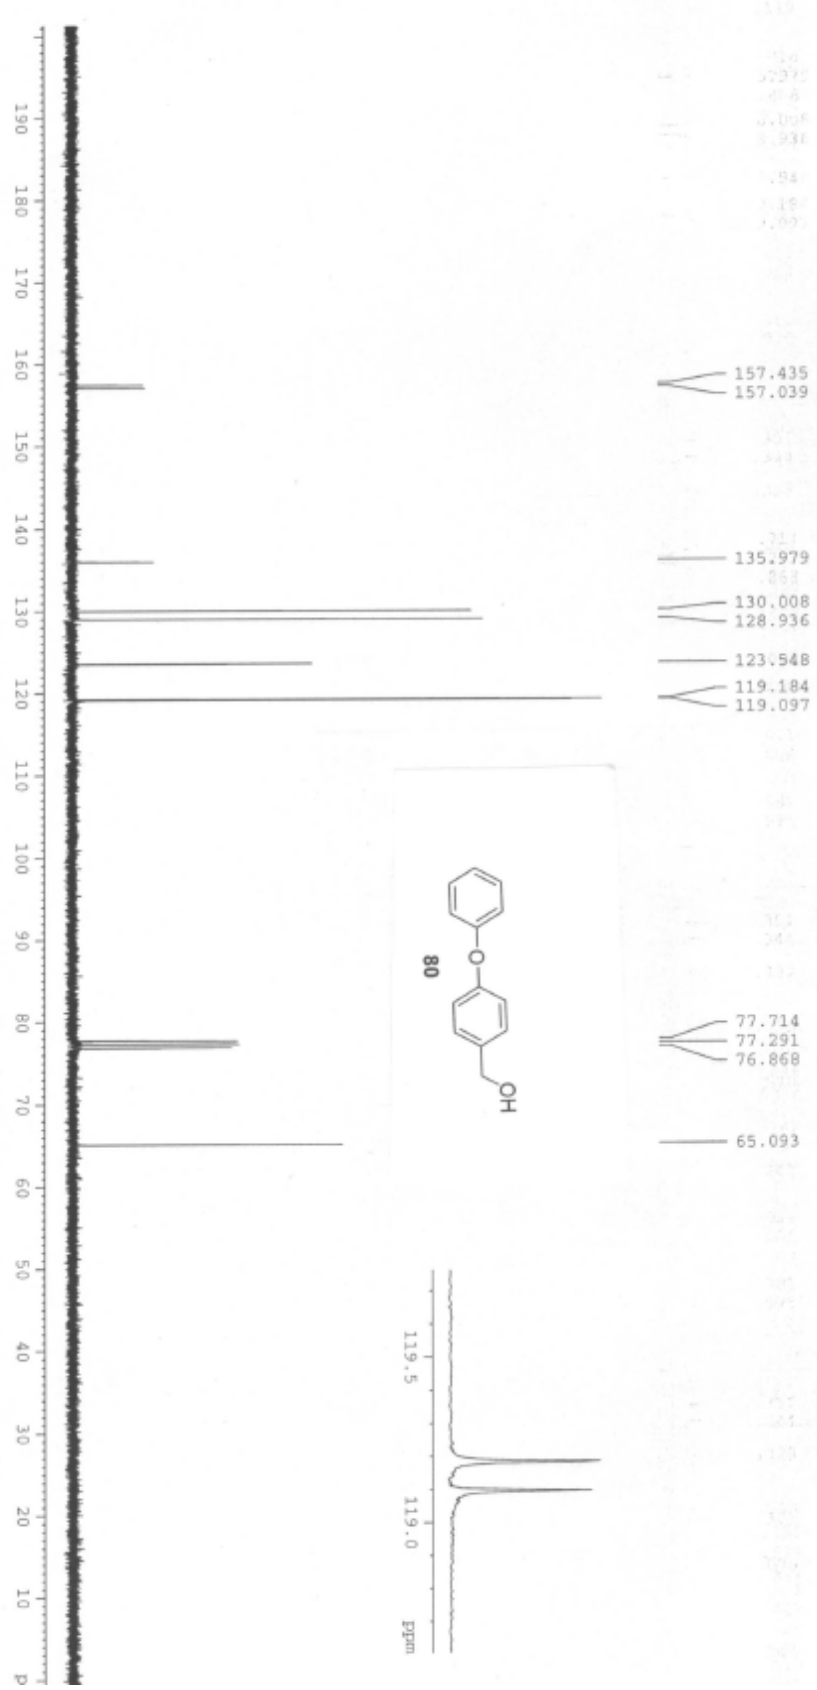

a111u184/300/11/30/05

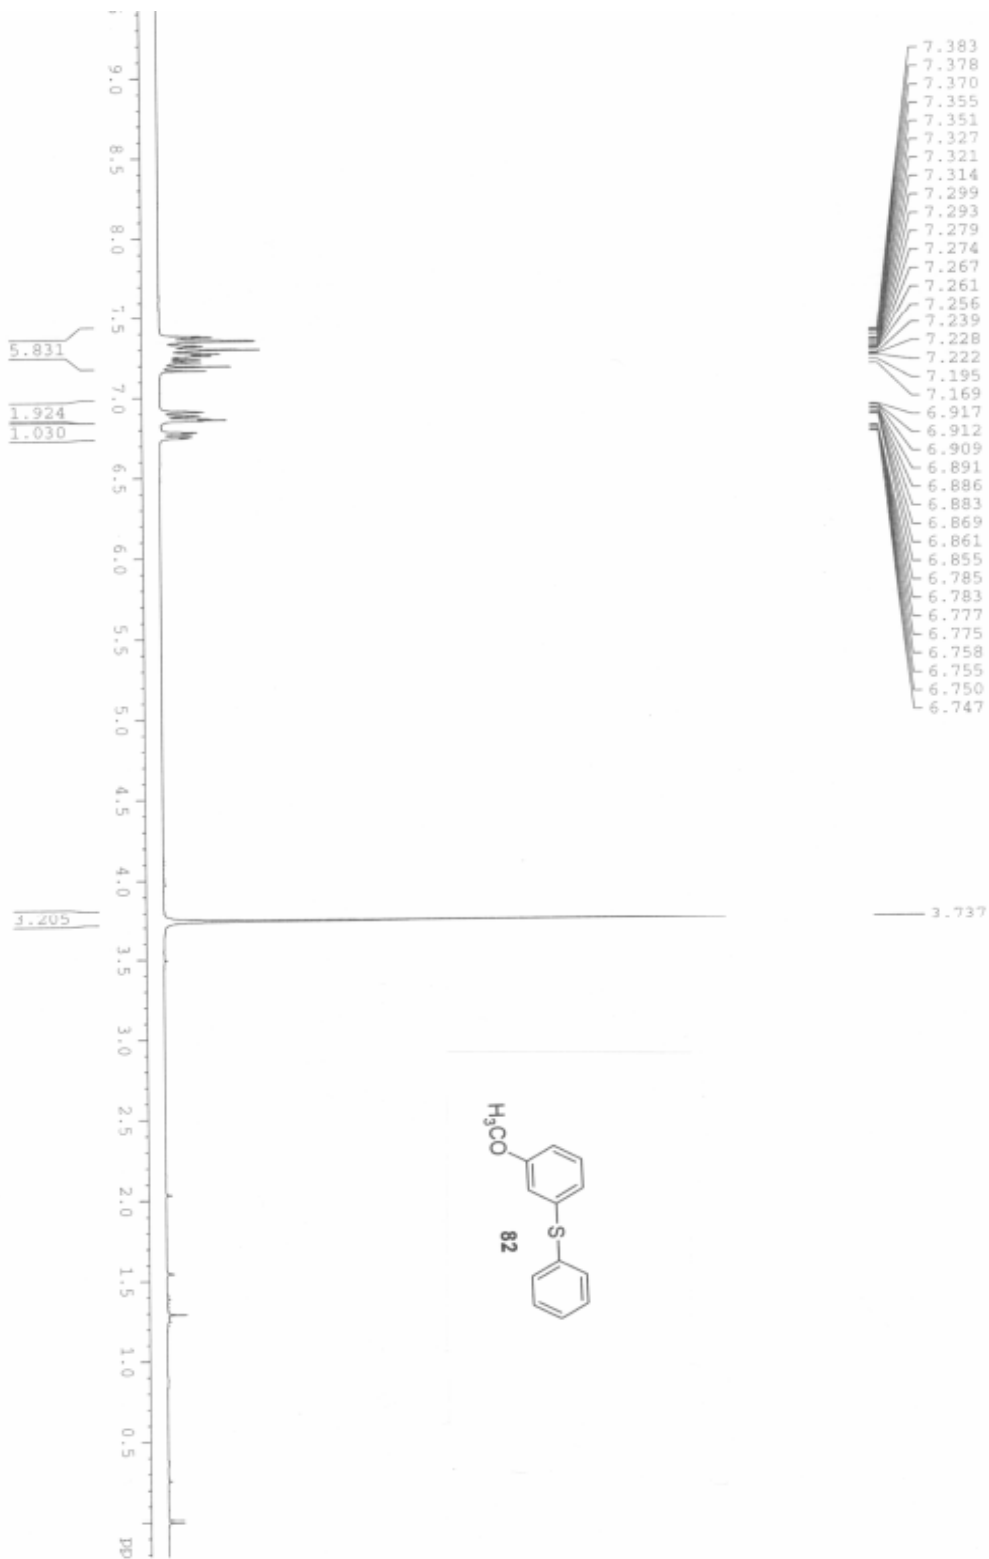

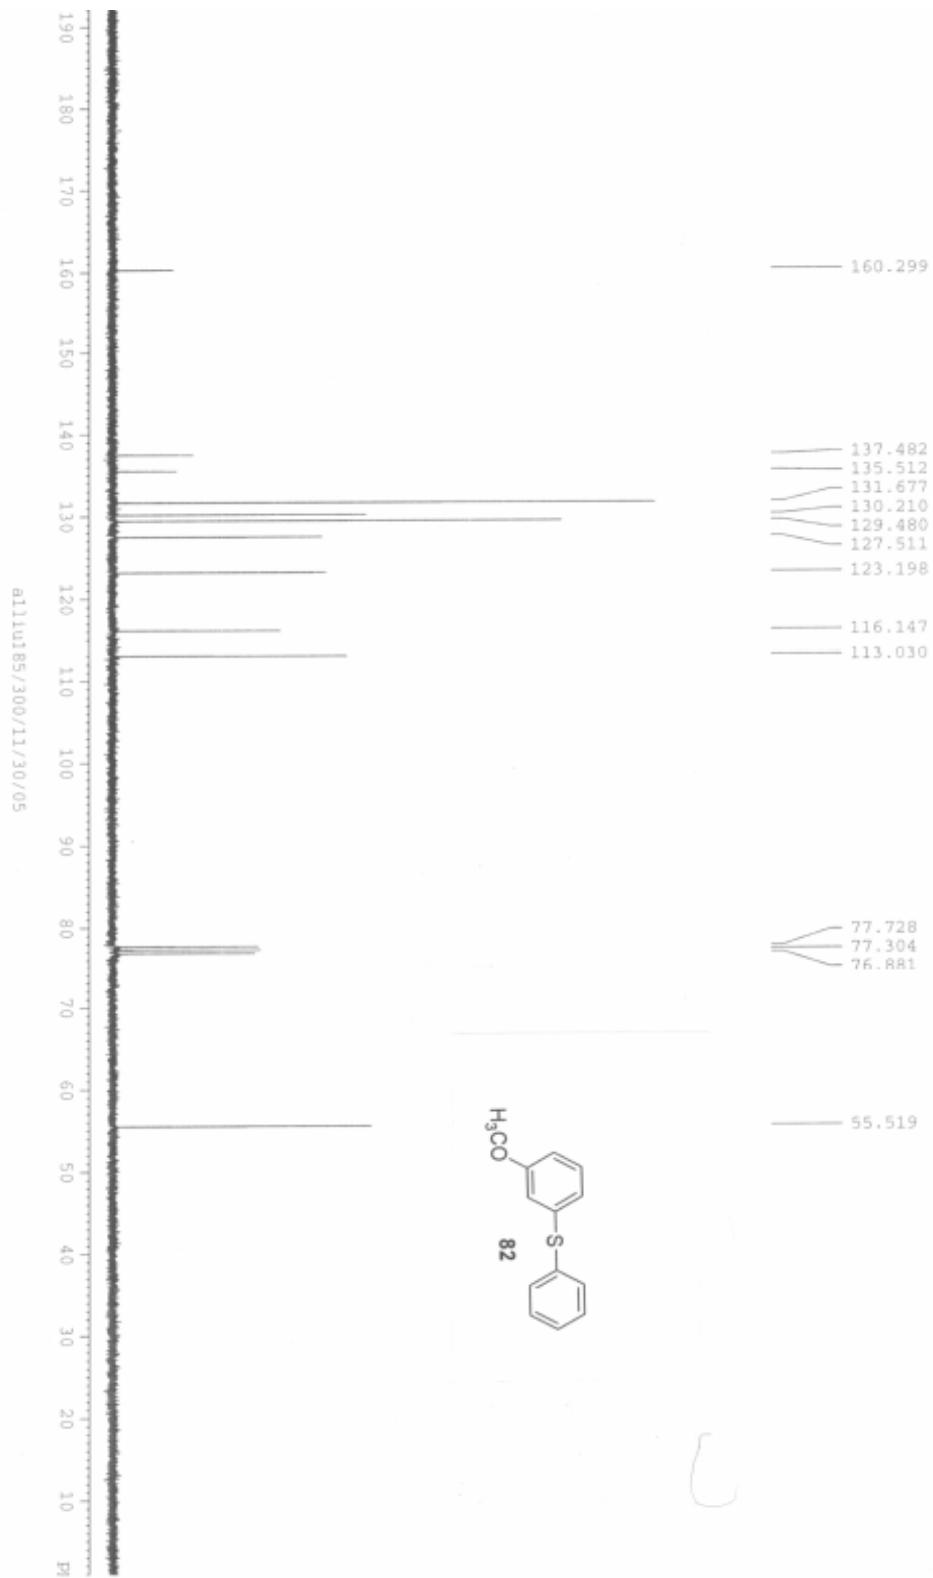

11-6/300/04/24/03

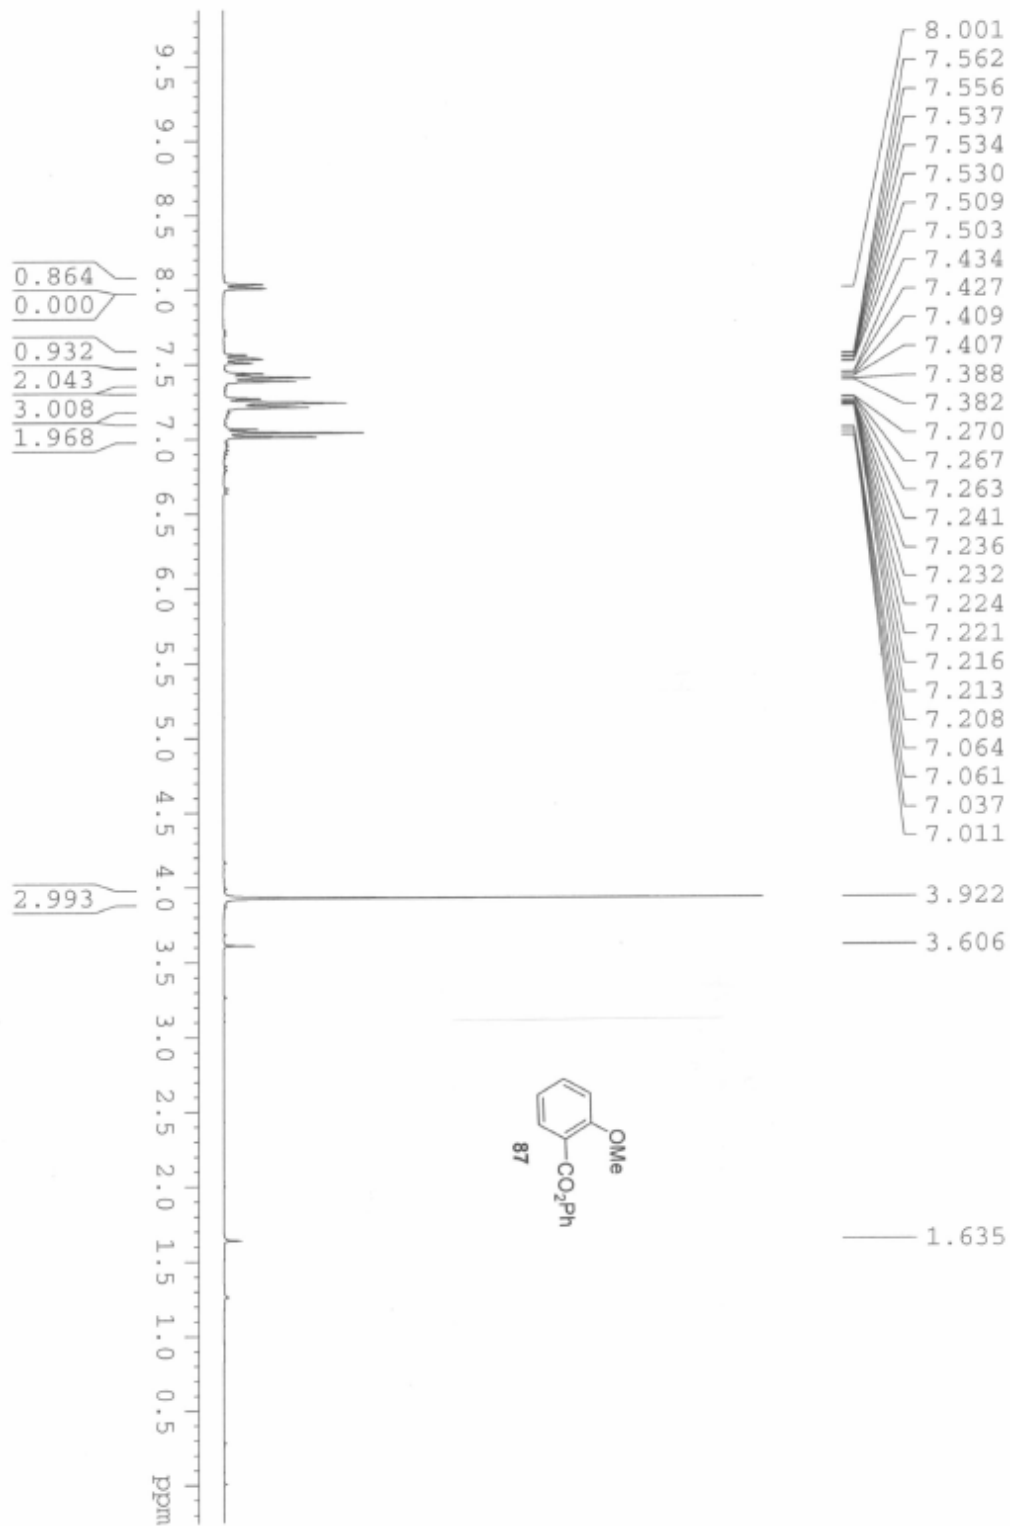



11-7/300/04/24/03

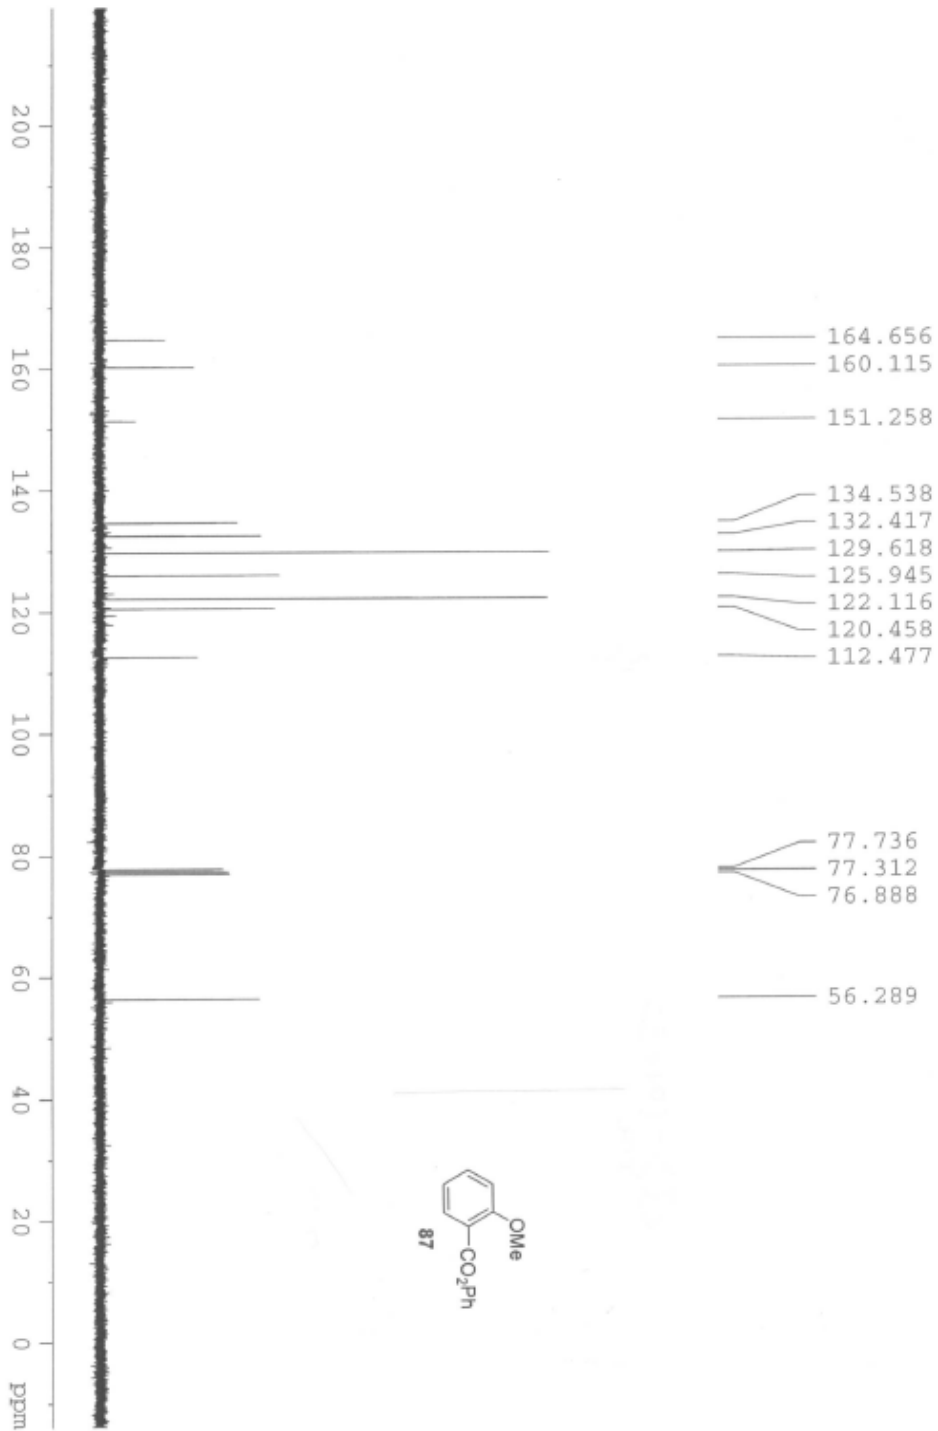

611114/300/2/25/06

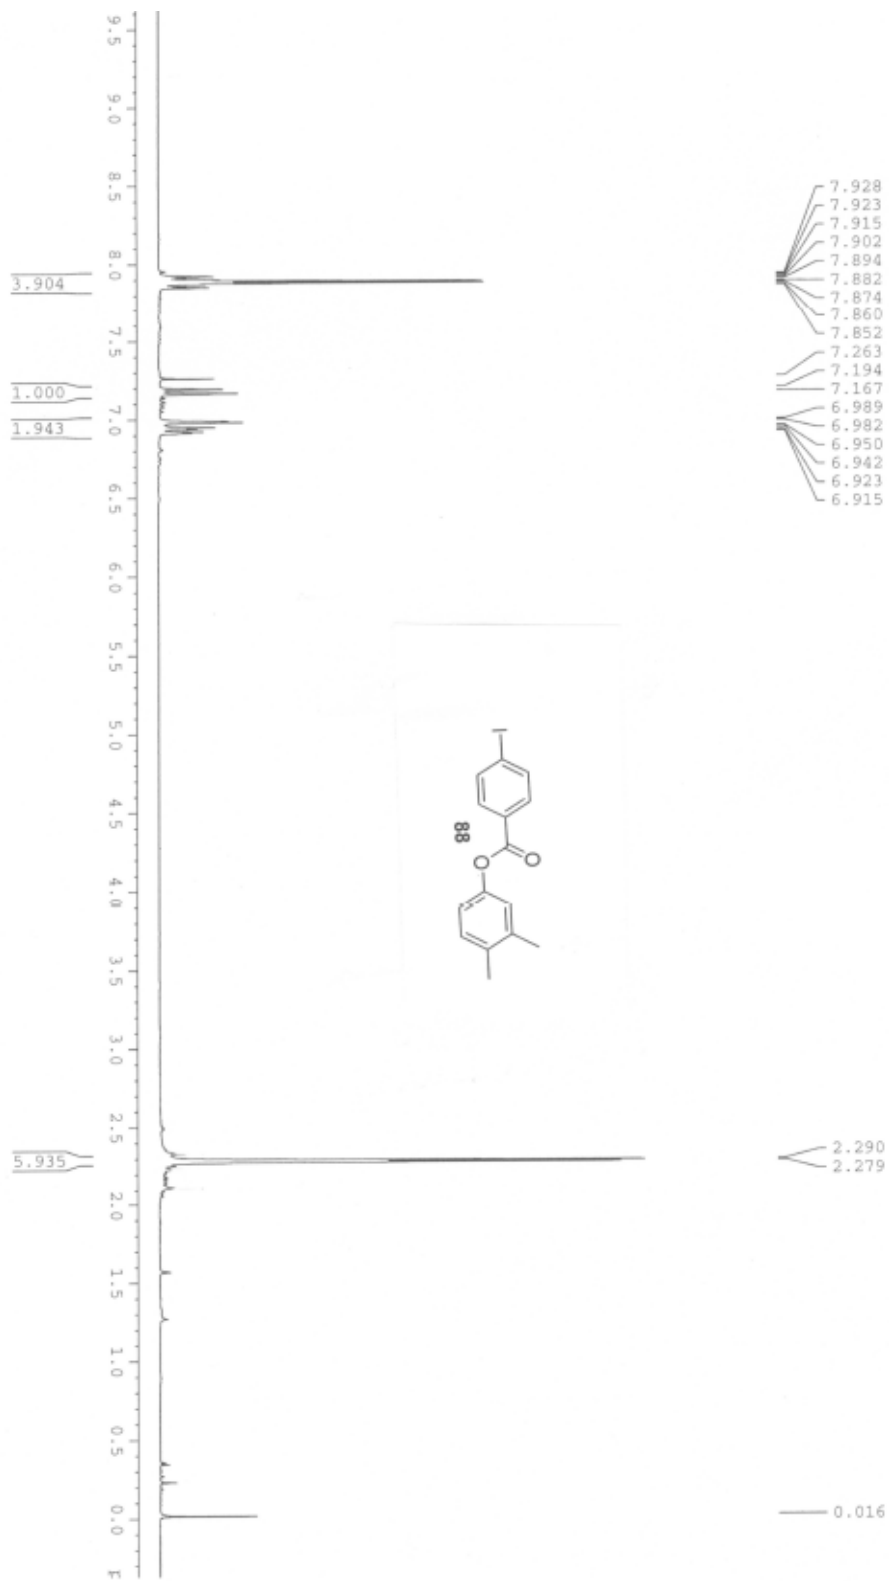

0111415/300/2/25/06

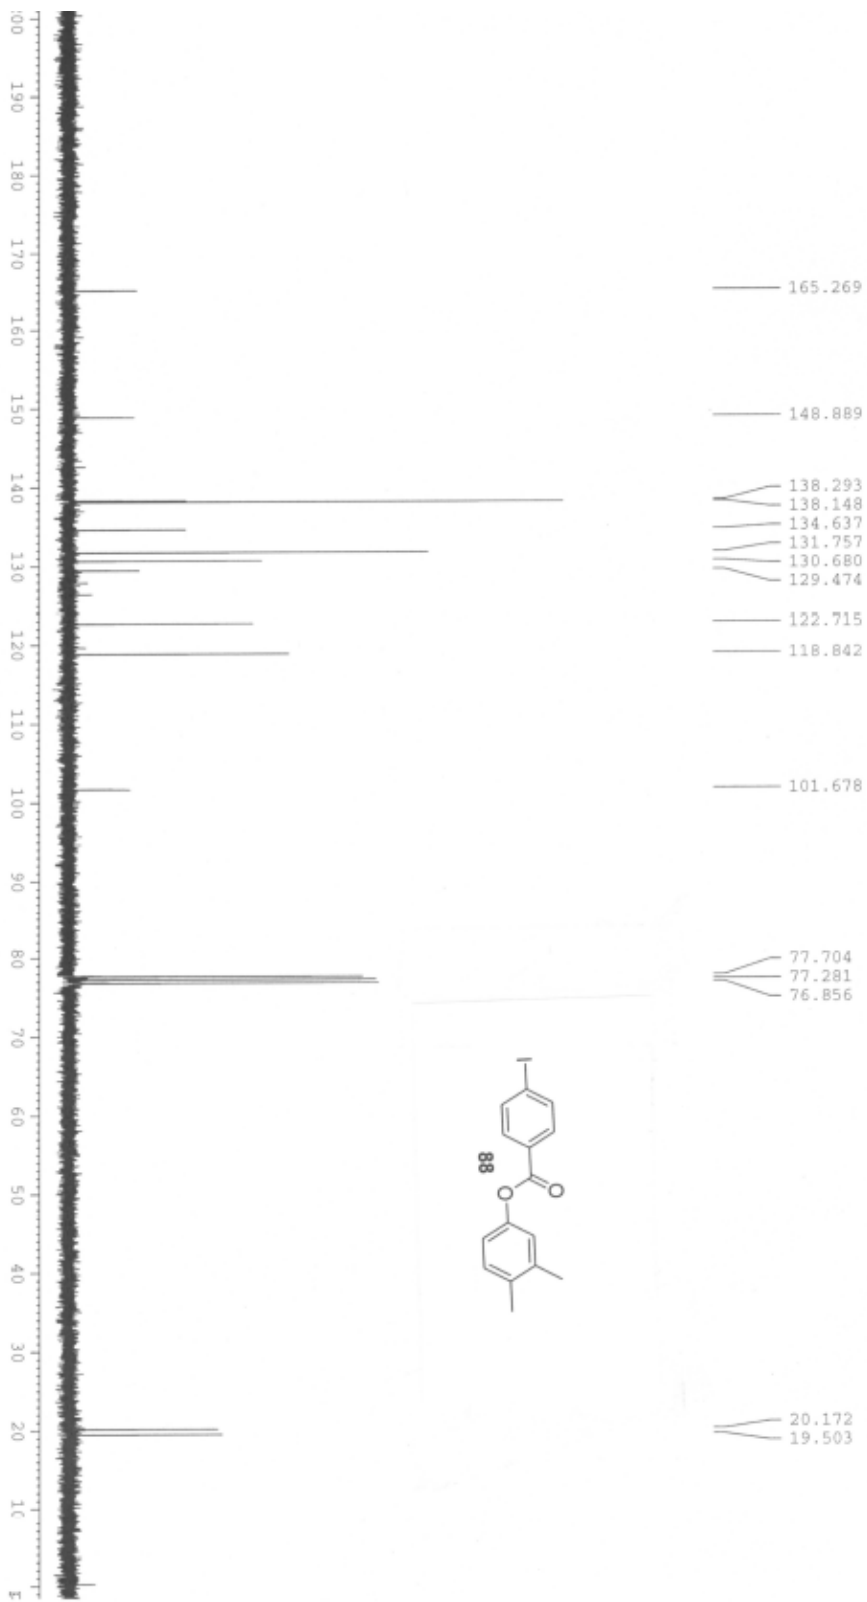

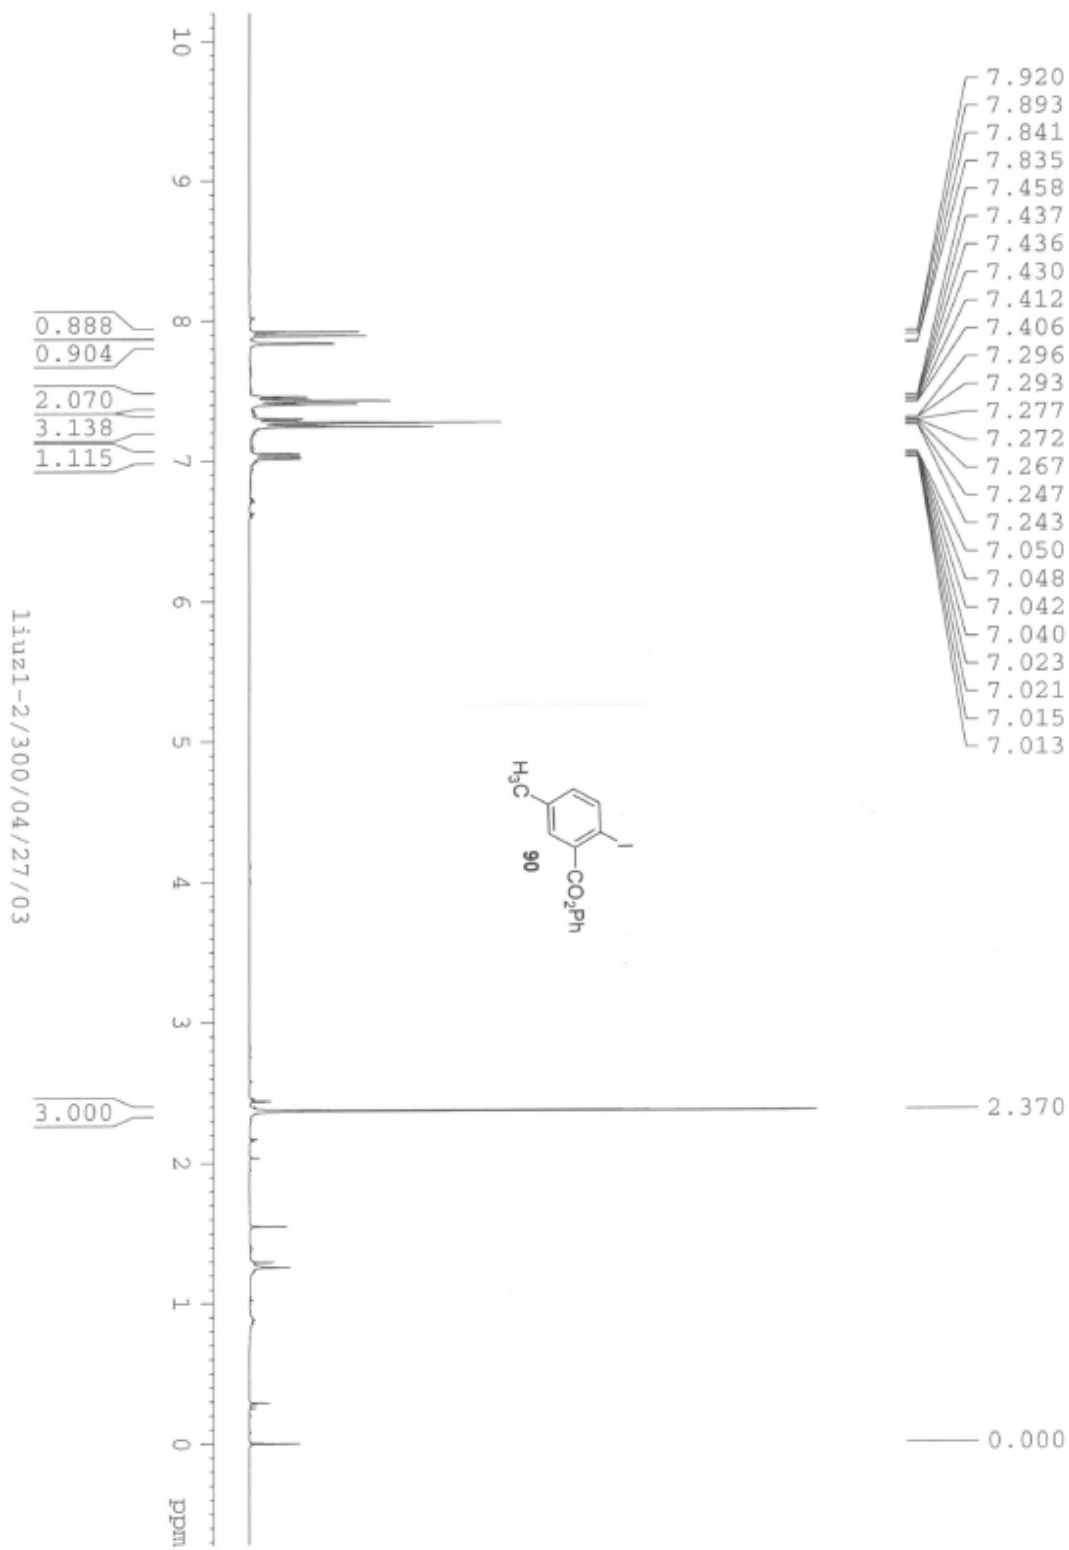

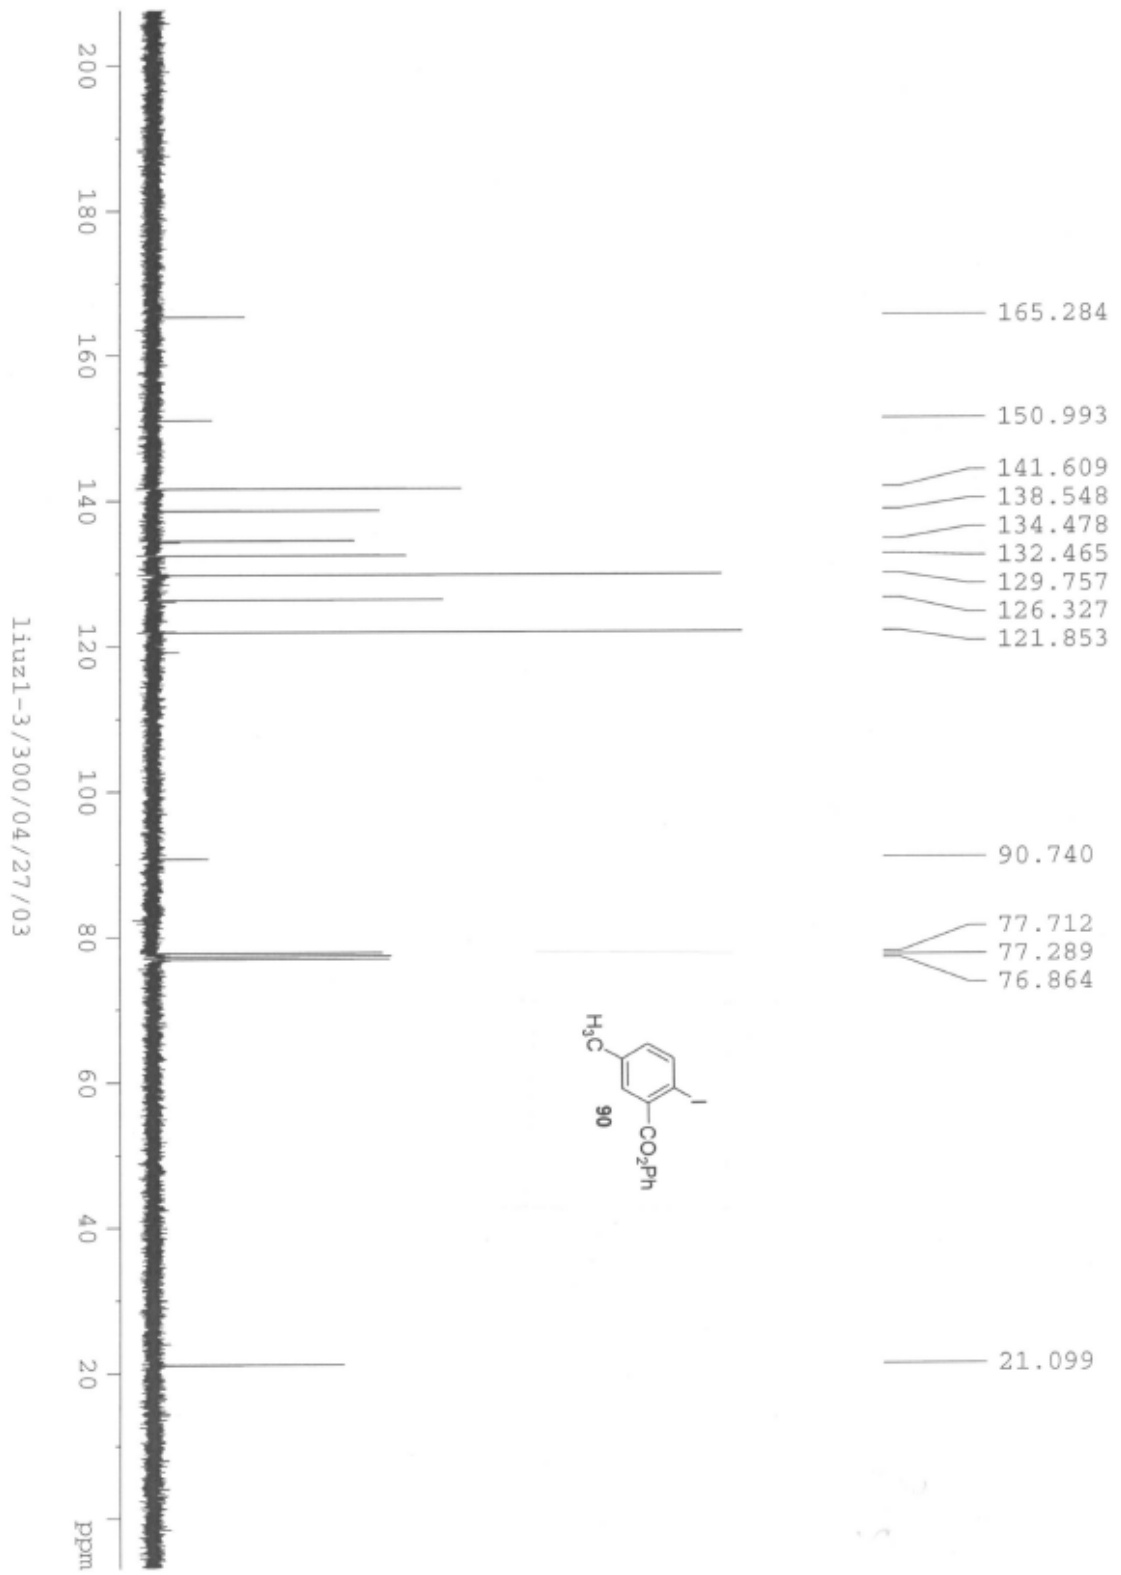

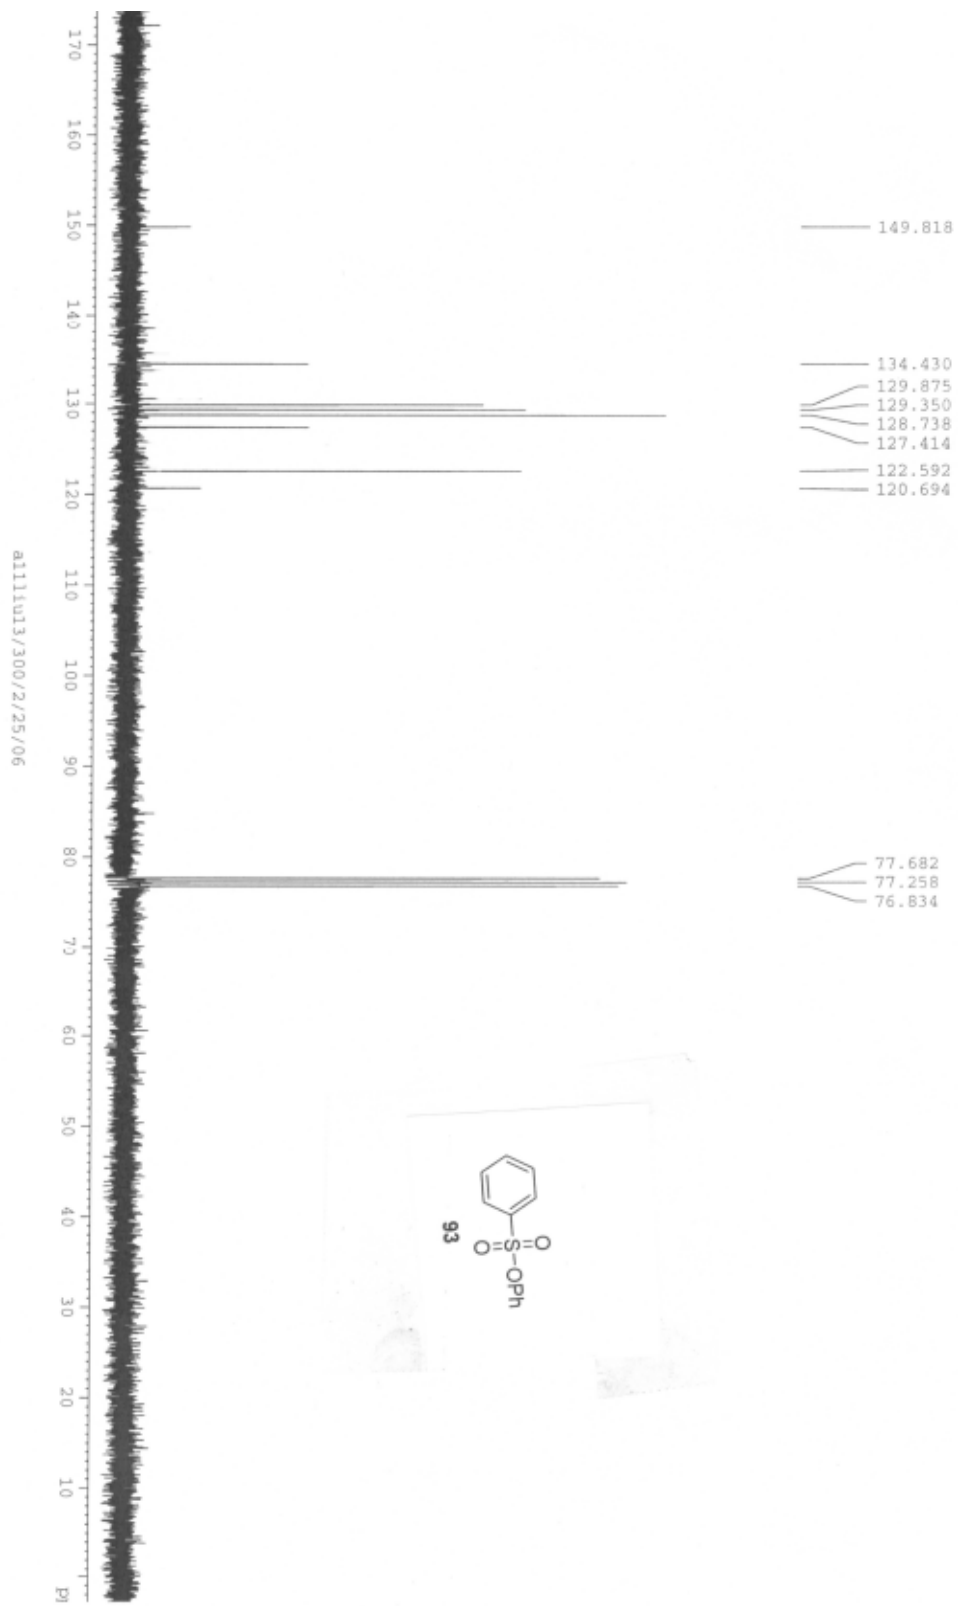

Supplement: NIHMS60962-supplement-si20060227_042.pdf [file NIHMS60962-supplement-si20060227_042.pdf]
